# Supplementary material for: Genes, pathways and transcription factors involved in seedling stage chilling stress tolerance in indica rice through RNA-Seq analysis
Source: BMC Plant Biol. 2019 Aug 14;19:352. doi: 10.1186/s12870-019-1922-8 (PMC6694648; doi:10.1186/s12870-019-1922-8)
Supplement: Supplementary file 20 — Table S14. KEGG Pathway analysis of DEGs at 48 h late response phase and after 24 h recovery of CTV and their comparison with CSV genotype. (XLS 528 kb) [file 12870_2019_1922_MOESM20_ESM.xls]

## Sheet: Table S11
Table S14. KEGG Pathway analysis of DEGs at 48 hrs late response phase and after 24 hrs recovery of CTV and their comparison with CSV genotype
Pathway enriched (T4 & T5 DEGs)	T4_up_exl_T5	T4_dwn-exl_T5	T5_up-exl_T4	T5_dwn_exl_T4	T4_T5_up	T4_T5_dwn	S4_T4_up	S4_T4_dwn	S5_T5_up	S5_T5_dwn	T1-T5_DEGs	Excl_T1-T5_S	KO ids	Enzyme Name
Metabolism
Carbohydrate metabolism
00010 Glycolysis / Gluconeogenesis [PATH:ko00010]
LOC_Os05g09500	No	No	Yes	No	No	No	No	No	No	No	No	No	K00844 HK	hexokinase [EC:2.7.1.1]
LOC_Os01g09570	No	Yes	No	No	No	No	No	No	No	No	No	No	K00850 pfkA, PFK	6-phosphofructokinase 1 [EC:2.7.1.11]
LOC_Os06g40640	No	No	No	No	No	Yes	No	No	No	Yes	No	No	K01623 ALDO	fructose-bisphosphate aldolase, class I [EC:4.1.2.13]
LOC_Os12g07210	No	No	No	Yes	No	No	No	No	No	No	No	No	K01623 ALDO	fructose-bisphosphate aldolase, class I [EC:4.1.2.13]
LOC_Os06g45590	No	No	No	Yes	No	No	No	No	No	No	No	No	K00134 GAPDH, gapA	glyceraldehyde 3-phosphate dehydrogenase [EC:1.2.1.12]
LOC_Os06g45710	No	No	Yes	No	No	No	No	No	No	No	No	No	K00927 PGK, pgk	phosphoglycerate kinase [EC:2.7.2.3]
LOC_Os02g51590	No	Yes	No	No	No	No	No	Yes	No	No	No	No	K01834 PGAM, gpmA	2,3-bisphosphoglycerate-dependent phosphoglycerate mutase [EC:5.4.2.1]
LOC_Os06g01630	No	No	Yes	No	No	No	No	No	No	No	No	No	K00627 DLAT, aceF, pdhC	pyruvate dehydrogenase E2 component (dihydrolipoamide acetyltransferase) [EC:2.3.1.12]
LOC_Os05g39320	No	No	No	Yes	No	No	No	No	No	No	No	No	K01568 E4.1.1.1, pdc	pyruvate decarboxylase [EC:4.1.1.1]
LOC_Os03g09020	No	No	Yes	No	No	No	No	No	Yes	No	No	No	K00121 frmA, ADH5, adhC	S-(hydroxymethyl)glutathione dehydrogenase / alcohol dehydrogenase [EC:1.1.1.284 1.1.1.1]
LOC_Os10g07229	No	Yes	No	No	No	No	No	No	No	No	No	No	K00001 E1.1.1.1, adh	alcohol dehydrogenase [EC:1.1.1.1]
LOC_Os05g38230	No	No	No	Yes	No	No	No	No	No	No	No	No	K00002 E1.1.1.2, adh	alcohol dehydrogenase (NADP+) [EC:1.1.1.2]
LOC_Os02g43194	No	No	No	No	No	Yes	No	Yes	No	Yes	No	No	K00128 E1.2.1.3	aldehyde dehydrogenase (NAD+) [EC:1.2.1.3]
LOC_Os02g43280	No	Yes	No	No	No	No	No	Yes	No	No	No	No	K00128 E1.2.1.3	aldehyde dehydrogenase (NAD+) [EC:1.2.1.3]
LOC_Os04g38540	No	No	Yes	No	No	No	No	No	Yes	No	No	No	K01785 E5.1.3.3, galM	aldose 1-epimerase [EC:5.1.3.3]
LOC_Os03g15050	No	Yes	No	No	No	No	No	Yes	No	No	No	No	K01610 E4.1.1.49, pckA	phosphoeNolpyruvate carboxykinase (ATP) [EC:4.1.1.49]
LOC_Os10g13700	No	No	No	Yes	No	No	No	No	No	No	No	No	K01610 E4.1.1.49, pckA	phosphoeNolpyruvate carboxykinase (ATP) [EC:4.1.1.49]
00020 Citrate cycle (TCA cycle) [PATH:ko00020]	No	No	No	No	No	No	No	No	No	No	No	No
LOC_Os08g09200	No	No	Yes	No	No	No	No	No	No	No	No	No	K01681 ACO, acnA	aconitate hydratase 1 / homoaconitase [EC:4.2.1.3 4.2.1.-]
LOC_Os04g40310	No	No	No	No	Yes	No	Yes	No	No	No	No	No	K00030 IDH3	isocitrate dehydrogenase (NAD+) [EC:1.1.1.41]
LOC_Os07g43700	No	No	No	No	No	Yes	No	Yes	No	No	No	No	K00026 MDH2	malate dehydrogenase [EC:1.1.1.37]
LOC_Os12g43630	No	No	Yes	No	No	No	No	No	No	No	No	No	K00026 MDH2	malate dehydrogenase [EC:1.1.1.37]
LOC_Os03g15050	No	Yes	No	No	No	No	No	Yes	No	No	No	No	K01610 E4.1.1.49, pckA	phosphoeNolpyruvate carboxykinase (ATP) [EC:4.1.1.49]
LOC_Os10g13700	No	No	No	Yes	No	No	No	No	No	No	No	No	K01610 E4.1.1.49, pckA	phosphoeNolpyruvate carboxykinase (ATP) [EC:4.1.1.49]
LOC_Os06g01630	No	No	Yes	No	No	No	No	No	No	No	No	No	K00627 DLAT, aceF, pdhC	pyruvate dehydrogenase E2 component (dihydrolipoamide acetyltransferase) [EC:2.3.1.12]
00030 Pentose phosphate pathway [PATH:ko00030]	No	No	No	No	No	No	No	No	No	No	No	No
LOC_Os03g30300	No	Yes	No	No	No	No	No	No	No	No	No	No	K01057 PGLS, pgl, devB	6-phosphoglucoNolactonase [EC:3.1.1.31]
LOC_Os06g40640	No	No	No	No	No	Yes	No	No	No	Yes	No	No	K01623 ALDO	fructose-bisphosphate aldolase, class I [EC:4.1.2.13]
LOC_Os12g07210	No	No	No	Yes	No	No	No	No	No	No	No	No	K01623 ALDO	fructose-bisphosphate aldolase, class I [EC:4.1.2.13]
LOC_Os01g09570	No	Yes	No	No	No	No	No	No	No	No	No	No	K00850 pfkA, PFK	6-phosphofructokinase 1 [EC:2.7.1.11]
00040 Pentose and glucuronate interconversions [PATH:ko00040]	No	No	No	No	No	No	No	No	No	No	No	No
LOC_Os01g21034	No	No	No	No	No	Yes	No	Yes	No	No	No	No	K01051 E3.1.1.11	pectinesterase [EC:3.1.1.11]
LOC_Os01g57854	No	No	Yes	No	No	No	No	No	No	No	No	No	K01051 E3.1.1.11	pectinesterase [EC:3.1.1.11]
LOC_Os08g34900	No	No	No	Yes	No	No	No	No	No	No	No	No	K01051 E3.1.1.11	pectinesterase [EC:3.1.1.11]
LOC_Os10g31910	No	No	Yes	No	No	No	No	No	No	No	No	No	K01728 E4.2.2.2, pel	pectate lyase [EC:4.2.2.2]
LOC_Os02g43194	No	No	No	No	No	Yes	No	Yes	No	Yes	No	No	K00128 E1.2.1.3	aldehyde dehydrogenase (NAD+) [EC:1.2.1.3]
LOC_Os02g43280	No	Yes	No	No	No	No	No	Yes	No	No	No	No	K00128 E1.2.1.3	aldehyde dehydrogenase (NAD+) [EC:1.2.1.3]
00051 Fructose and manNose metabolism [PATH:ko00051]	No	No	No	No	No	No	No	No	No	No	No	No
LOC_Os11g38810	No	No	No	Yes	No	No	No	No	No	No	No	No	K01809 E5.3.1.8, manA	manNose-6-phosphate isomerase [EC:5.3.1.8]
LOC_Os08g13930	No	Yes	No	No	No	No	No	No	No	No	No	No	K00966 GMPP	manNose-1-phosphate guanylyltransferase [EC:2.7.7.13]
LOC_Os05g09500	No	No	Yes	No	No	No	No	No	No	No	No	No	K00844 HK	hexokinase [EC:2.7.1.1]
LOC_Os01g09570	No	Yes	No	No	No	No	No	No	No	No	No	No	K00850 pfkA, PFK	6-phosphofructokinase 1 [EC:2.7.1.11]
LOC_Os08g43190	No	No	Yes	No	No	No	No	No	No	No	No	No	K00008 E1.1.1.14, gutB	L-iditol 2-dehydrogenase [EC:1.1.1.14]
LOC_Os06g40640	No	No	No	No	No	Yes	No	No	No	Yes	No	No	K01623 ALDO	fructose-bisphosphate aldolase, class I [EC:4.1.2.13]
LOC_Os12g07210	No	No	No	Yes	No	No	No	No	No	No	No	No	K01623 ALDO	fructose-bisphosphate aldolase, class I [EC:4.1.2.13]
00052 Galactose metabolism [PATH:ko00052]	No	No	No	No	No	No	No	No	No	No	No	No
LOC_Os05g09500	No	No	Yes	No	No	No	No	No	No	No	No	No	K00844 HK	hexokinase [EC:2.7.1.1]
LOC_Os03g59430	No	Yes	No	No	No	No	No	Yes	No	No	No	No	K06617 E2.4.1.82	raffiNose synthase [EC:2.4.1.82]
LOC_Os07g10840	No	Yes	No	No	No	No	No	Yes	No	No	No	No	K06617 E2.4.1.82	raffiNose synthase [EC:2.4.1.82]
LOC_Os07g48160	No	No	Yes	No	No	No	No	No	Yes	No	No	No	K07407 E3.2.1.22B, galA, rafA	alpha-galactosidase [EC:3.2.1.22]
LOC_Os01g09570	No	Yes	No	No	No	No	No	No	No	No	No	No	K00850 pfkA, PFK	6-phosphofructokinase 1 [EC:2.7.1.11]
LOC_Os02g01590	No	Yes	Yes	No	No	No	No	Yes	No	No	Yes	Yes	K01193 E3.2.1.26, sacA	beta-fructofuraNosidase [EC:3.2.1.26]
LOC_Os06g46284	No	Yes	Yes	No	No	No	No	Yes	No	No	No	No	K01187 E3.2.1.20, malZ	alpha-glucosidase [EC:3.2.1.20]
00053 Ascorbate and aldarate metabolism [PATH:ko00053]	No	No	No	No	No	No	No	No	No	No	No	No
LOC_Os06g36560	No	No	Yes	No	No	No	No	No	No	No	No	No	K00469 MIOX	iNositol oxygenase [EC:1.13.99.1]
LOC_Os02g43194	No	No	No	No	No	Yes	No	Yes	No	Yes	No	No	K00128 E1.2.1.3	aldehyde dehydrogenase (NAD+) [EC:1.2.1.3]
LOC_Os02g43280	No	Yes	No	No	No	No	No	Yes	No	No	No	No	K00128 E1.2.1.3	aldehyde dehydrogenase (NAD+) [EC:1.2.1.3]
00500 Starch and sucrose metabolism [PATH:ko00500]	No	No	No	No	No	No	No	No	No	No	No	No
LOC_Os02g01590	No	Yes	Yes	No	No	No	No	Yes	No	No	Yes	Yes	K01193 E3.2.1.26, sacA	beta-fructofuraNosidase [EC:3.2.1.26]
LOC_Os08g20660	No	No	Yes	No	No	No	No	No	No	No	No	No	K00696 E2.4.1.14	sucrose-phosphate synthase [EC:2.4.1.14]
LOC_Os03g22120	No	No	Yes	No	No	No	No	No	Yes	No	No	No	K00695 E2.4.1.13	sucrose synthase [EC:2.4.1.13]
LOC_Os06g46284	No	Yes	Yes	No	No	No	No	Yes	No	No	No	No	K01187 E3.2.1.20, malZ	alpha-glucosidase [EC:3.2.1.20]
LOC_Os04g39900	No	Yes	No	No	No	No	No	Yes	No	No	No	No	K01188 E3.2.1.21	beta-glucosidase [EC:3.2.1.21]
LOC_Os05g30350	No	Yes	No	No	No	No	No	Yes	No	No	No	No	K01188 E3.2.1.21	beta-glucosidase [EC:3.2.1.21]
LOC_Os10g17650	No	No	Yes	No	No	No	No	No	Yes	No	No	No	K01188 E3.2.1.21	beta-glucosidase [EC:3.2.1.21]
LOC_Os03g53790	Yes	No	No	No	No	No	No	No	No	No	No	No	K05349 bglX	beta-glucosidase [EC:3.2.1.21]
LOC_Os03g53800	No	No	Yes	No	No	No	No	No	No	No	No	No	K05349 bglX	beta-glucosidase [EC:3.2.1.21]
LOC_Os02g44230	Yes	No	No	Yes	No	No	Yes	No	No	No	Yes	Yes	K01087 otsB	trehalose 6-phosphate phosphatase [EC:3.1.3.12]
LOC_Os02g44235	Yes	No	No	Yes	No	No	Yes	No	No	No	Yes	Yes	K01087 otsB	trehalose 6-phosphate phosphatase [EC:3.1.3.12]
LOC_Os09g20390	No	No	No	No	No	Yes	No	Yes	No	No	No	No	K01087 otsB	trehalose 6-phosphate phosphatase [EC:3.1.3.12]
LOC_Os01g54560	Yes	No	No	No	No	No	No	No	No	No	No	No	K16055 TPS	trehalose 6-phosphate synthase/phosphatase [EC:2.4.1.15 3.1.3.12]
LOC_Os02g54820	No	No	Yes	No	No	No	No	No	No	No	No	No	K16055 TPS	trehalose 6-phosphate synthase/phosphatase [EC:2.4.1.15 3.1.3.12]
LOC_Os05g44100	Yes	No	No	No	No	No	No	No	No	No	No	No	K16055 TPS	trehalose 6-phosphate synthase/phosphatase [EC:2.4.1.15 3.1.3.12]
LOC_Os08g31980	Yes	No	No	No	No	No	No	No	No	No	No	No	K16055 TPS	trehalose 6-phosphate synthase/phosphatase [EC:2.4.1.15 3.1.3.12]
LOC_Os08g34580	No	No	Yes	No	No	No	No	No	No	No	No	No	K16055 TPS	trehalose 6-phosphate synthase/phosphatase [EC:2.4.1.15 3.1.3.12]
LOC_Os02g54890	No	No	No	Yes	No	No	No	No	No	No	No	No	K08679 E5.1.3.6	UDP-glucuronate 4-epimerase [EC:5.1.3.6]
LOC_Os01g21034	No	No	No	No	No	Yes	No	Yes	No	No	No	No	K01051 E3.1.1.11	pectinesterase [EC:3.1.1.11]
LOC_Os01g57854	No	No	Yes	No	No	No	No	No	No	No	No	No	K01051 E3.1.1.11	pectinesterase [EC:3.1.1.11]
LOC_Os08g34900	No	No	No	Yes	No	No	No	No	No	No	No	No	K01051 E3.1.1.11	pectinesterase [EC:3.1.1.11]
LOC_Os05g09500	No	No	Yes	No	No	No	No	No	No	No	No	No	K00844 HK	hexokinase [EC:2.7.1.1]
LOC_Os02g32660	No	No	Yes	No	No	No	No	No	No	No	No	No	K00700 glgB	1,4-alpha-glucan branching enzyme [EC:2.4.1.18]
LOC_Os06g49970	No	No	Yes	No	No	No	No	No	Yes	No	No	No	K01176 E3.2.1.1, amyA, malS	alpha-amylase [EC:3.2.1.1]
LOC_Os03g04770	No	Yes	No	No	No	No	No	No	No	No	No	No	K01177 E3.2.1.2	beta-amylase [EC:3.2.1.2]
LOC_Os03g52630	No	No	No	Yes	No	No	No	No	No	Yes	No	No	K01179 E3.2.1.4	endoglucanase [EC:3.2.1.4]
00520 AmiNo sugar and nucleotide sugar metabolism [PATH:ko00520]	No	No	No	No	No	No	No	No	No	No	No	No
LOC_Os04g41620	No	No	Yes	No	No	No	No	No	No	No	No	No	K01183 E3.2.1.14	chitinase [EC:3.2.1.14]
LOC_Os04g41680	No	No	Yes	No	No	No	No	No	Yes	No	No	No	K01183 E3.2.1.14	chitinase [EC:3.2.1.14]
LOC_Os05g33130	No	No	Yes	No	No	No	No	No	No	No	No	No	K01183 E3.2.1.14	chitinase [EC:3.2.1.14]
LOC_Os07g19040	Yes	No	No	No	No	No	No	No	No	No	No	No	K01183 E3.2.1.14	chitinase [EC:3.2.1.14]
LOC_Os07g38790	No	No	No	Yes	No	No	No	No	No	Yes	No	No	K12373 HEXA_B	hexosaminidase [EC:3.2.1.52]
LOC_Os04g52370	No	No	Yes	No	No	No	No	No	No	No	No	No	K00972 UAP1	UDP-N-acetylglucosamine pyrophosphorylase [EC:2.7.7.23]
LOC_Os05g09500	No	No	Yes	No	No	No	No	No	No	No	No	No	K00844 HK	hexokinase [EC:2.7.1.1]
LOC_Os09g31310	No	Yes	No	No	No	No	No	Yes	No	No	No	No	K00621 E2.3.1.4, GNA1	glucosamine-phosphate N-acetyltransferase [EC:2.3.1.4]
LOC_Os02g04840	No	No	Yes	No	No	No	No	No	No	No	No	No	K12446 E2.7.1.46	L-arabiNokinase [EC:2.7.1.46]
LOC_Os11g03730	No	No	Yes	No	No	No	No	No	No	No	No	No	K01209 E3.2.1.55, abfA	alpha-N-arabiNofuraNosidase [EC:3.2.1.55]
LOC_Os12g03470	No	No	Yes	No	No	No	No	No	Yes	No	No	No	K01209 E3.2.1.55, abfA	alpha-N-arabiNofuraNosidase [EC:3.2.1.55]
LOC_Os12g03530	No	No	Yes	No	No	No	No	No	No	No	No	No	K01209 E3.2.1.55, abfA	alpha-N-arabiNofuraNosidase [EC:3.2.1.55]
LOC_Os02g54890	No	No	No	Yes	No	No	No	No	No	No	No	No	K08679 E5.1.3.6	UDP-glucuronate 4-epimerase [EC:5.1.3.6]
LOC_Os08g13930	No	Yes	No	No	No	No	No	No	No	No	No	No	K00966 GMPP	manNose-1-phosphate guanylyltransferase [EC:2.7.7.13]
LOC_Os11g38810	No	No	No	Yes	No	No	No	No	No	No	No	No	K01809 E5.3.1.8, manA	manNose-6-phosphate isomerase [EC:5.3.1.8]
00620 Pyruvate metabolism [PATH:ko00620]	No	No	No	No	No	No	No	No	No	No	No	No
LOC_Os06g01630	No	No	Yes	No	No	No	No	No	No	No	No	No	K00627 DLAT, aceF, pdhC	pyruvate dehydrogenase E2 component (dihydrolipoamide acetyltransferase) [EC:2.3.1.12]
LOC_Os06g15380	No	Yes	No	No	No	No	No	No	No	No	No	No	K01512 acyP	acylphosphatase [EC:3.6.1.7]
LOC_Os06g15390	No	Yes	No	No	No	No	No	Yes	No	No	No	No	K01512 acyP	acylphosphatase [EC:3.6.1.7]
LOC_Os02g43194	No	No	No	No	No	Yes	No	Yes	No	Yes	No	No	K00128 E1.2.1.3	aldehyde dehydrogenase (NAD+) [EC:1.2.1.3]
LOC_Os02g43280	No	Yes	No	No	No	No	No	Yes	No	No	No	No	K00128 E1.2.1.3	aldehyde dehydrogenase (NAD+) [EC:1.2.1.3]
LOC_Os03g21460	No	Yes	No	No	No	No	No	Yes	No	No	No	No	K01069 E3.1.2.6, gloB	hydroxyacylglutathione hydrolase [EC:3.1.2.6]
LOC_Os01g54030	No	No	Yes	No	No	No	No	No	No	No	No	No	K00029 E1.1.1.40, maeB	malate dehydrogenase (oxaloacetate-decarboxylating)(NADP+) [EC:1.1.1.40]
LOC_Os07g43700	No	No	No	No	No	Yes	No	Yes	No	No	No	No	K00026 MDH2	malate dehydrogenase [EC:1.1.1.37]
LOC_Os12g43630	No	No	Yes	No	No	No	No	No	No	No	No	No	K00026 MDH2	malate dehydrogenase [EC:1.1.1.37]
LOC_Os03g15050	No	Yes	No	No	No	No	No	Yes	No	No	No	No	K01610 E4.1.1.49, pckA	phosphoeNolpyruvate carboxykinase (ATP) [EC:4.1.1.49]
LOC_Os10g13700	No	No	No	Yes	No	No	No	No	No	No	No	No	K01610 E4.1.1.49, pckA	phosphoeNolpyruvate carboxykinase (ATP) [EC:4.1.1.49]
00630 Glyoxylate and dicarboxylate metabolism [PATH:ko00630]	No	No	No	No	No	No	No	No	No	No	No	No
LOC_Os07g34520	No	No	Yes	No	No	No	No	No	Yes	No	No	No	K01637 E4.1.3.1, aceA	isocitrate lyase [EC:4.1.3.1]
LOC_Os07g43700	No	No	No	No	No	Yes	No	Yes	No	No	No	No	K00026 MDH2	malate dehydrogenase [EC:1.1.1.37]
LOC_Os12g43630	No	No	Yes	No	No	No	No	No	No	No	No	No	K00026 MDH2	malate dehydrogenase [EC:1.1.1.37]
LOC_Os08g09200	No	No	Yes	No	No	No	No	No	No	No	No	No	K01681 ACO, acnA	aconitate hydratase 1 / homoaconitase [EC:4.2.1.3 4.2.1.-]
LOC_Os04g53210	No	No	Yes	No	No	No	No	No	Yes	No	No	No	K11517 HAO	(S)-2-hydroxy-acid oxidase [EC:1.1.3.15]
LOC_Os04g53214	Yes	No	No	No	No	No	No	No	No	No	No	No	K11517 HAO	(S)-2-hydroxy-acid oxidase [EC:1.1.3.15]
LOC_Os07g05820	No	No	No	Yes	No	No	No	No	No	No	No	No	K11517 HAO	(S)-2-hydroxy-acid oxidase [EC:1.1.3.15]
LOC_Os07g42440	No	Yes	No	No	No	No	No	Yes	No	No	No	No	K11517 HAO	(S)-2-hydroxy-acid oxidase [EC:1.1.3.15]
LOC_Os06g51150	No	No	Yes	No	No	No	No	No	No	No	No	No	K03781 katE, CAT, catB, srpA	catalase [EC:1.11.1.6]
LOC_Os01g58020	Yes	No	No	No	No	No	No	No	No	No	No	No	K01601 rbcL	ribulose-bisphosphate carboxylase large chain [EC:4.1.1.39]
LOC_Os05g35330	Yes	No	No	No	No	No	No	No	No	No	No	No	K01601 rbcL	ribulose-bisphosphate carboxylase large chain [EC:4.1.1.39]
LOC_Os10g21268	Yes	No	No	No	No	No	No	No	No	No	No	No	K01601 rbcL	ribulose-bisphosphate carboxylase large chain [EC:4.1.1.39]
LOC_Os12g10580	Yes	No	No	No	No	No	No	No	No	No	No	No	K01601 rbcL	ribulose-bisphosphate carboxylase large chain [EC:4.1.1.39]
LOC_Os12g34550	Yes	No	No	No	No	No	No	No	No	No	No	No	K01601 rbcL	ribulose-bisphosphate carboxylase large chain [EC:4.1.1.39]
LOC_Os02g05830	Yes	No	No	No	No	No	No	No	No	No	No	No	K01602 rbcS	ribulose-bisphosphate carboxylase small chain [EC:4.1.1.39]
LOC_Os10g37180	No	Yes	No	No	No	No	No	Yes	No	No	No	No	K02437 gcvH, GCSH	glycine cleavage system H protein
LOC_Os01g12830	No	Yes	No	No	No	No	No	No	No	No	No	No	K15919 HPR2	hydroxypyruvate reductase 2
00640 PropaNoate metabolism [PATH:ko00640]	No	No	No	No	No	No	No	No	No	No	No	No
LOC_Os02g43194	No	No	No	No	No	Yes	No	Yes	No	Yes	No	No	K00128 E1.2.1.3	aldehyde dehydrogenase (NAD+) [EC:1.2.1.3]
LOC_Os02g43280	No	Yes	No	No	No	No	No	Yes	No	No	No	No	K00128 E1.2.1.3	aldehyde dehydrogenase (NAD+) [EC:1.2.1.3]
00650 ButaNoate metabolism [PATH:ko00650]	No	No	No	No	No	No	No	No	No	No	No	No
LOC_Os03g51080	No	No	Yes	No	No	No	No	No	No	No	No	No	K01580 E4.1.1.15, gadB, gadA, GAD	glutamate decarboxylase [EC:4.1.1.15]
LOC_Os04g37500	No	No	Yes	No	No	No	No	No	No	No	No	No	K01580 E4.1.1.15, gadB, gadA, GAD	glutamate decarboxylase [EC:4.1.1.15]
LOC_Os08g36320	No	Yes	No	No	No	No	No	Yes	No	No	No	No	K01580 E4.1.1.15, gadB, gadA, GAD	glutamate decarboxylase [EC:4.1.1.15]
LOC_Os01g16350	No	No	Yes	No	No	No	No	No	Yes	No	No	No	K01640 E4.1.3.4, HMGCL, hmgL	hydroxymethylglutaryl-CoA lyase [EC:4.1.3.4]
LOC_Os04g32010	No	No	No	Yes	No	No	No	No	No	No	No	No	K01652 E2.2.1.6L, ilvB, ilvG, ilvI	acetolactate synthase I/II/III large subunit [EC:2.2.1.6]
00660 C5-Branched dibasic acid metabolism [PATH:ko00660]	No	No	No	No	No	No	No	No	No	No	No	No
LOC_Os04g32010	No	No	No	Yes	No	No	No	No	No	No	No	No	K01652 E2.2.1.6L, ilvB, ilvG, ilvI	acetolactate synthase I/II/III large subunit [EC:2.2.1.6]
00562 INositol phosphate metabolism [PATH:ko00562]	No	No	No	No	No	No	No	No	No	No	No	No
LOC_Os04g59540	No	No	Yes	No	No	No	No	No	Yes	No	No	No	K00921 PIKFYVE, FAB1	1-phosphatidyliNositol-3-phosphate 5-kinase [EC:2.7.1.150]
LOC_Os09g23740	No	No	No	Yes	No	No	No	No	No	No	No	No	K00921 PIKFYVE, FAB1	1-phosphatidyliNositol-3-phosphate 5-kinase [EC:2.7.1.150]
LOC_Os01g01190	Yes	No	No	No	No	No	No	No	No	No	No	No	K01114 plcC	phospholipase C [EC:3.1.4.3]
LOC_Os03g63580	No	No	Yes	No	No	No	No	No	Yes	No	No	No	K01114 plcC	phospholipase C [EC:3.1.4.3]
LOC_Os02g26720	No	No	Yes	No	No	No	No	No	Yes	No	No	No	K00913 ITPK1	iNositol-1,3,4-trisphosphate 5/6-kinase / iNositol-tetrakisphosphate 1-kinase [EC:2.7.1.159 2.7.1.134]
LOC_Os06g36560	No	No	Yes	No	No	No	No	No	No	No	No	No	K00469 MIOX	iNositol oxygenase [EC:1.13.99.1]
Energy metabolism	No	No	No	No	No	No	No	No	No	No	No	No
00190 Oxidative phosphorylation [PATH:ko00190]	No	No	No	No	No	No	No	No	No	No	No	No
LOC_Os10g21396	Yes	No	No	No	No	No	No	No	No	No	No	No	K05572 ndhA	NAD(P)H-quiNone oxidoreductase subunit 1 [EC:1.6.5.3]
LOC_Os04g16732	Yes	No	No	No	No	No	No	No	No	No	No	No	K05579 ndhH	NAD(P)H-quiNone oxidoreductase subunit H [EC:1.6.5.3]
LOC_Os10g21394	Yes	No	No	No	No	No	No	No	No	No	No	No	K05579 ndhH	NAD(P)H-quiNone oxidoreductase subunit H [EC:1.6.5.3]
LOC_Os12g33958	Yes	No	No	No	No	No	No	No	No	No	No	No	K03935 NDUFS2	NADH dehydrogenase (ubiquiNone) Fe-S protein 2 [EC:1.6.5.3 1.6.99.3]
LOC_Os02g57180	No	Yes	No	No	No	No	No	Yes	No	No	No	No	K03953 NDUFA9	NADH dehydrogenase (ubiquiNone) 1 alpha subcomplex 9 [EC:1.6.5.3 1.6.99.3]
LOC_Os06g47000	No	Yes	No	No	No	No	No	Yes	No	No	No	No	K03885 ndh	NADH dehydrogenase [EC:1.6.99.3]
LOC_Os12g39930	Yes	No	No	No	No	No	No	No	No	No	No	No	K02262 COX3	cytochrome c oxidase subunit 3
LOC_Os12g33946	Yes	No	No	No	No	No	No	No	No	No	No	No	K02256 COX1	cytochrome c oxidase subunit 1 [EC:1.9.3.1]
LOC_Os01g67364	Yes	No	No	No	No	No	No	No	No	No	No	No	K02261 COX2	cytochrome c oxidase subunit 2
LOC_Os01g58000	Yes	No	No	No	No	No	No	No	No	No	No	No	K02114 ATPF1E, atpC	F-type H+-transporting ATPase subunit epsilon [EC:3.6.3.14]
LOC_Os06g39756	Yes	No	No	No	No	No	No	No	No	No	No	No	K02114 ATPF1E, atpC	F-type H+-transporting ATPase subunit epsilon [EC:3.6.3.14]
LOC_Os10g21264	Yes	No	No	No	No	No	No	No	No	No	No	No	K02114 ATPF1E, atpC	F-type H+-transporting ATPase subunit epsilon [EC:3.6.3.14]
LOC_Os01g25065	Yes	No	No	No	No	No	No	No	No	No	No	No	K02112 ATPF1B, atpD	F-type H+-transporting ATPase subunit beta [EC:3.6.3.14]
LOC_Os03g55874	Yes	No	No	No	No	No	No	No	No	No	No	No	K02112 ATPF1B, atpD	F-type H+-transporting ATPase subunit beta [EC:3.6.3.14]
LOC_Os05g35320	Yes	No	No	No	No	No	No	No	No	No	No	No	K02112 ATPF1B, atpD	F-type H+-transporting ATPase subunit beta [EC:3.6.3.14]
LOC_Os06g39740	Yes	No	No	No	No	No	No	No	No	No	No	No	K02112 ATPF1B, atpD	F-type H+-transporting ATPase subunit beta [EC:3.6.3.14]
LOC_Os10g21266	Yes	No	No	No	No	No	No	No	No	No	No	No	K02112 ATPF1B, atpD	F-type H+-transporting ATPase subunit beta [EC:3.6.3.14]
LOC_Os12g10570	Yes	No	No	No	No	No	No	No	No	No	No	No	K02112 ATPF1B, atpD	F-type H+-transporting ATPase subunit beta [EC:3.6.3.14]
LOC_Os12g34018	Yes	No	No	No	No	No	No	No	No	No	No	No	K02109 ATPF0B, atpF	F-type H+-transporting ATPase subunit b [EC:3.6.3.14]
LOC_Os05g45740	Yes	No	No	No	No	No	No	No	No	No	No	No	K02140 ATPeFG, ATP5L	F-type H+-transporting ATPase subunit g [EC:3.6.3.14]
LOC_Os01g51380	No	No	Yes	No	No	No	No	No	No	No	No	No	K02147 ATPeVB, ATP6B1	V-type H+-transporting ATPase subunit B [EC:3.6.3.14]
LOC_Os04g51270	No	No	Yes	No	No	No	No	No	No	No	No	No	K02152 ATPeVG, ATP6G1	V-type H+-transporting ATPase subunit G [EC:3.6.3.14]
LOC_Os02g15970	No	Yes	No	No	No	No	No	Yes	No	No	No	No	K01535 E3.6.3.6	H+-transporting ATPase [EC:3.6.3.6]
LOC_Os03g48310	No	No	Yes	No	No	No	No	No	No	No	No	No	K01535 E3.6.3.6	H+-transporting ATPase [EC:3.6.3.6]
LOC_Os04g56160	No	Yes	No	No	No	No	No	No	No	No	No	No	K01535 E3.6.3.6	H+-transporting ATPase [EC:3.6.3.6]
LOC_Os02g55890	No	Yes	No	No	No	No	No	Yes	No	No	No	No	K01507 ppa	iNorganic pyrophosphatase [EC:3.6.1.1]
LOC_Os05g36260	Yes	No	No	No	No	No	Yes	No	No	No	No	No	K01507 ppa	iNorganic pyrophosphatase [EC:3.6.1.1]
00195 Photosynthesis [PATH:ko00195]	No	No	No	No	No	No	No	No	No	No	No	No
LOC_Os04g16770	Yes	No	No	No	No	No	No	No	No	No	No	No	K02703 psbA	photosystem II P680 reaction center D1 protein
LOC_Os08g35420	Yes	No	No	No	No	No	No	No	No	No	No	No	K02703 psbA	photosystem II P680 reaction center D1 protein
LOC_Os10g21192	Yes	No	No	No	No	No	No	No	No	No	No	No	K02703 psbA	photosystem II P680 reaction center D1 protein
LOC_Os10g39880	Yes	No	No	No	No	No	No	No	No	No	No	No	K02703 psbA	photosystem II P680 reaction center D1 protein
LOC_Os12g19580	Yes	No	No	No	No	No	No	No	No	No	No	No	K02703 psbA	photosystem II P680 reaction center D1 protein
LOC_Os06g39708	Yes	No	No	No	No	No	No	No	No	No	No	No	K02704 psbB	photosystem II CP47 chlorophyll apoprotein
LOC_Os09g04680	Yes	No	No	No	No	No	No	No	No	No	No	No	K02704 psbB	photosystem II CP47 chlorophyll apoprotein
LOC_Os10g21310	Yes	No	No	No	No	No	No	No	No	No	No	No	K02704 psbB	photosystem II CP47 chlorophyll apoprotein
LOC_Os12g10600	Yes	No	No	No	No	No	No	No	No	No	No	No	K02704 psbB	photosystem II CP47 chlorophyll apoprotein
LOC_Os02g24632	Yes	No	No	No	No	No	No	No	No	No	No	No	K02705 psbC	photosystem II CP43 chlorophyll apoprotein
LOC_Os04g16874	Yes	No	No	No	No	No	No	No	No	No	No	No	K02705 psbC	photosystem II CP43 chlorophyll apoprotein
LOC_Os10g21212	Yes	No	No	No	No	No	No	No	No	No	No	No	K02705 psbC	photosystem II CP43 chlorophyll apoprotein
LOC_Os02g24634	Yes	No	No	No	No	No	No	No	No	No	No	No	K02706 psbD	photosystem II P680 reaction center D2 protein
LOC_Os04g16872	Yes	No	No	No	No	No	No	No	No	No	No	No	K02706 psbD	photosystem II P680 reaction center D2 protein
LOC_Os06g39728	Yes	No	No	No	No	No	No	No	No	No	No	No	K02707 psbE	photosystem II cytochrome b559 subunit alpha
LOC_Os10g21298	Yes	No	No	No	No	No	No	No	No	No	No	No	K02707 psbE	photosystem II cytochrome b559 subunit alpha
LOC_Os04g16848	Yes	No	No	No	No	No	No	No	No	No	No	No	K02709 psbH	photosystem II PsbH protein
LOC_Os01g31690	No	Yes	No	No	No	No	No	No	No	No	No	No	K02716 psbO	photosystem II oxygen-evolving enhancer protein 1
LOC_Os07g04840	No	Yes	No	No	No	No	No	Yes	No	No	No	No	K02717 psbP	photosystem II oxygen-evolving enhancer protein 2
LOC_Os08g25900	No	Yes	No	No	No	No	No	No	No	No	No	No	K02717 psbP	photosystem II oxygen-evolving enhancer protein 2
LOC_Os02g36850	No	Yes	No	No	No	No	No	Yes	No	No	No	No	K08901 psbQ	photosystem II oxygen-evolving enhancer protein 3
LOC_Os07g36080	No	Yes	No	No	No	No	No	Yes	No	No	No	No	K08901 psbQ	photosystem II oxygen-evolving enhancer protein 3
LOC_Os07g05360	No	Yes	No	No	No	No	No	Yes	No	No	No	No	K03541 psbR	photosystem II 10kDa protein
LOC_Os07g05365	No	No	Yes	No	No	No	No	No	Yes	No	No	No	K03541 psbR	photosystem II 10kDa protein
LOC_Os08g02630	No	Yes	No	No	No	No	No	No	No	No	No	No	K02723 psbY	photosystem II PsbY protein
LOC_Os03g21560	No	Yes	No	No	No	No	No	Yes	No	No	No	No	K08902 psb27	photosystem II Psb27 protein
LOC_Os01g57964	Yes	No	No	No	No	No	No	No	No	No	No	No	K02689 psaA	photosystem I P700 chlorophyll a apoprotein A1
LOC_Os04g16760	Yes	No	No	No	No	No	No	No	No	No	No	No	K02689 psaA	photosystem I P700 chlorophyll a apoprotein A1
LOC_Os05g01675	Yes	No	No	No	No	No	No	No	No	No	No	No	K02689 psaA	photosystem I P700 chlorophyll a apoprotein A1
LOC_Os10g21250	Yes	No	No	No	No	No	No	No	No	No	No	No	K02689 psaA	photosystem I P700 chlorophyll a apoprotein A1
LOC_Os10g38229	Yes	No	No	No	No	No	No	No	No	No	No	No	K02689 psaA	photosystem I P700 chlorophyll a apoprotein A1
LOC_Os01g57962	Yes	No	No	No	No	No	No	No	No	No	No	No	K02690 psaB	photosystem I P700 chlorophyll a apoprotein A2
LOC_Os10g21248	Yes	No	No	No	No	No	No	No	No	No	No	No	K02690 psaB	photosystem I P700 chlorophyll a apoprotein A2
LOC_Os10g38234	Yes	No	No	No	No	No	No	No	No	No	No	No	K02690 psaB	photosystem I P700 chlorophyll a apoprotein A2
LOC_Os08g44680	No	Yes	No	No	No	No	No	Yes	No	No	No	No	K02692 psaD	photosystem I subunit II
LOC_Os03g56670	No	Yes	No	No	No	No	No	Yes	No	No	No	No	K02694 psaF	photosystem I subunit III
LOC_Os05g48630	No	Yes	No	No	No	No	No	No	No	No	No	No	K02695 psaH	photosystem I subunit VI
LOC_Os12g23200	No	Yes	No	No	No	No	No	No	No	No	No	No	K02699 psaL	photosystem I subunit XI
LOC_Os12g08770	No	Yes	No	No	No	No	No	Yes	No	No	No	No	K02701 psaN	photosystem I subunit PsaN
LOC_Os01g65902	Yes	No	No	No	No	No	No	No	No	No	No	No	K02634 petA	apocytochrome f
LOC_Os08g15280	Yes	No	No	No	No	No	No	No	No	No	No	No	K02634 petA	apocytochrome f
LOC_Os10g21290	Yes	No	No	No	No	No	No	No	No	No	No	No	K02634 petA	apocytochrome f
LOC_Os01g57942	Yes	No	No	No	No	No	No	No	No	No	No	No	K02635 petB	cytochrome b6
LOC_Os04g16846	Yes	No	No	No	No	No	No	No	No	No	No	No	K02635 petB	cytochrome b6
LOC_Os10g21324	Yes	No	No	No	No	No	No	No	No	No	No	No	K02635 petB	cytochrome b6
LOC_Os01g57945	Yes	No	No	No	No	No	No	No	No	No	No	No	K02637 petD	cytochrome b6-f complex subunit 4
LOC_Os04g16844	Yes	No	No	No	No	No	No	No	No	No	No	No	K02637 petD	cytochrome b6-f complex subunit 4
LOC_Os08g15292	Yes	No	No	No	No	No	No	No	No	No	No	No	K02637 petD	cytochrome b6-f complex subunit 4
LOC_Os10g21326	Yes	No	No	No	No	No	No	No	No	No	No	No	K02637 petD	cytochrome b6-f complex subunit 4
LOC_Os01g64120	No	Yes	No	No	No	No	No	No	No	No	No	No	K02639 petF	ferredoxin
LOC_Os03g57120	No	Yes	No	No	No	No	No	Yes	No	No	No	No	K02641 petH	ferredoxin--NADP+ reductase [EC:1.18.1.2]
LOC_Os01g58000	Yes	No	No	No	No	No	No	No	No	No	No	No	K02114 ATPF1E, atpC	F-type H+-transporting ATPase subunit epsilon [EC:3.6.3.14]
LOC_Os06g39756	Yes	No	No	No	No	No	No	No	No	No	No	No	K02114 ATPF1E, atpC	F-type H+-transporting ATPase subunit epsilon [EC:3.6.3.14]
LOC_Os10g21264	Yes	No	No	No	No	No	No	No	No	No	No	No	K02114 ATPF1E, atpC	F-type H+-transporting ATPase subunit epsilon [EC:3.6.3.14]
LOC_Os01g25065	Yes	No	No	No	No	No	No	No	No	No	No	No	K02112 ATPF1B, atpD	F-type H+-transporting ATPase subunit beta [EC:3.6.3.14]
LOC_Os03g55874	Yes	No	No	No	No	No	No	No	No	No	No	No	K02112 ATPF1B, atpD	F-type H+-transporting ATPase subunit beta [EC:3.6.3.14]
LOC_Os05g35320	Yes	No	No	No	No	No	No	No	No	No	No	No	K02112 ATPF1B, atpD	F-type H+-transporting ATPase subunit beta [EC:3.6.3.14]
LOC_Os06g39740	Yes	No	No	No	No	No	No	No	No	No	No	No	K02112 ATPF1B, atpD	F-type H+-transporting ATPase subunit beta [EC:3.6.3.14]
LOC_Os10g21266	Yes	No	No	No	No	No	No	No	No	No	No	No	K02112 ATPF1B, atpD	F-type H+-transporting ATPase subunit beta [EC:3.6.3.14]
LOC_Os12g10570	Yes	No	No	No	No	No	No	No	No	No	No	No	K02112 ATPF1B, atpD	F-type H+-transporting ATPase subunit beta [EC:3.6.3.14]
LOC_Os12g34018	Yes	No	No	No	No	No	No	No	No	No	No	No	K02109 ATPF0B, atpF	F-type H+-transporting ATPase subunit b [EC:3.6.3.14]
00196 Photosynthesis - antenna proteins [PATH:ko00196]	No	No	No	No	No	No	No	No	No	No	No	No
LOC_Os06g21590	No	Yes	No	No	No	No	No	No	No	No	No	No	K08907 LHCA1	light-harvesting complex I chlorophyll a/b binding protein 1
LOC_Os07g38960	No	Yes	No	No	No	No	No	No	No	No	No	No	K08908 LHCA2	light-harvesting complex I chlorophyll a/b binding protein 2
LOC_Os09g26810	No	Yes	No	No	No	No	No	Yes	No	No	No	No	K08908 LHCA2	light-harvesting complex I chlorophyll a/b binding protein 2
LOC_Os08g33820	No	Yes	No	No	No	No	No	Yes	No	No	No	No	K08910 LHCA4	light-harvesting complex I chlorophyll a/b binding protein 4
LOC_Os01g41710	No	Yes	No	No	No	No	No	Yes	No	No	No	No	K08912 LHCB1	light-harvesting complex II chlorophyll a/b binding protein 1
LOC_Os01g52240	No	Yes	No	No	No	No	No	No	No	No	No	No	K08912 LHCB1	light-harvesting complex II chlorophyll a/b binding protein 1
LOC_Os09g17740	No	Yes	No	No	No	No	No	Yes	No	No	No	No	K08912 LHCB1	light-harvesting complex II chlorophyll a/b binding protein 1
LOC_Os07g37550	No	Yes	No	No	No	No	No	No	No	No	No	No	K08914 LHCB3	light-harvesting complex II chlorophyll a/b binding protein 3
LOC_Os07g37240	No	Yes	No	No	No	No	No	Yes	No	No	No	No	K08915 LHCB4	light-harvesting complex II chlorophyll a/b binding protein 4
LOC_Os04g38410	No	Yes	No	No	No	No	No	Yes	No	No	No	No	K08917 LHCB6	light-harvesting complex II chlorophyll a/b binding protein 6
00194 Photosynthesis proteins [BR:ko00194]	No	No	No	No	No	No	No	No	No	No	No	No
00710 Carbon fixation in photosynthetic organisms [PATH:ko00710]	No	No	No	No	No	No	No	No	No	No	No	No
LOC_Os01g58020	Yes	No	No	No	No	No	No	No	No	No	No	No	K01601 rbcL	ribulose-bisphosphate carboxylase large chain [EC:4.1.1.39]
LOC_Os05g35330	Yes	No	No	No	No	No	No	No	No	No	No	No	K01601 rbcL	ribulose-bisphosphate carboxylase large chain [EC:4.1.1.39]
LOC_Os10g21268	Yes	No	No	No	No	No	No	No	No	No	No	No	K01601 rbcL	ribulose-bisphosphate carboxylase large chain [EC:4.1.1.39]
LOC_Os12g10580	Yes	No	No	No	No	No	No	No	No	No	No	No	K01601 rbcL	ribulose-bisphosphate carboxylase large chain [EC:4.1.1.39]
LOC_Os12g34550	Yes	No	No	No	No	No	No	No	No	No	No	No	K01601 rbcL	ribulose-bisphosphate carboxylase large chain [EC:4.1.1.39]
LOC_Os02g05830	Yes	No	No	No	No	No	No	No	No	No	No	No	K01602 rbcS	ribulose-bisphosphate carboxylase small chain [EC:4.1.1.39]
LOC_Os06g45710	No	No	Yes	No	No	No	No	No	No	No	No	No	K00927 PGK, pgk	phosphoglycerate kinase [EC:2.7.2.3]
LOC_Os06g45590	No	No	No	Yes	No	No	No	No	No	No	No	No	K00134 GAPDH, gapA	glyceraldehyde 3-phosphate dehydrogenase [EC:1.2.1.12]
LOC_Os04g38600	No	Yes	No	No	No	No	No	No	No	No	No	No	K05298 GAPA	glyceraldehyde-3-phosphate dehydrogenase (NADP+) (phosphorylating) [EC:1.2.1.13]
LOC_Os06g40640	No	No	No	No	No	Yes	No	No	No	Yes	No	No	K01623 ALDO	fructose-bisphosphate aldolase, class I [EC:4.1.2.13]
LOC_Os12g07210	No	No	No	Yes	No	No	No	No	No	No	No	No	K01623 ALDO	fructose-bisphosphate aldolase, class I [EC:4.1.2.13]
LOC_Os03g15050	No	Yes	No	No	No	No	No	Yes	No	No	No	No	K01610 E4.1.1.49, pckA	phosphoeNolpyruvate carboxykinase (ATP) [EC:4.1.1.49]
LOC_Os10g13700	No	No	No	Yes	No	No	No	No	No	No	No	No	K01610 E4.1.1.49, pckA	phosphoeNolpyruvate carboxykinase (ATP) [EC:4.1.1.49]
LOC_Os10g25140	No	No	Yes	No	No	No	No	No	No	No	No	No	K00814 GPT, ALT	alanine transaminase [EC:2.6.1.2]
LOC_Os01g54030	No	No	Yes	No	No	No	No	No	No	No	No	No	K00029 E1.1.1.40, maeB	malate dehydrogenase (oxaloacetate-decarboxylating)(NADP+) [EC:1.1.1.40]
LOC_Os07g43700	No	No	No	No	No	Yes	No	Yes	No	No	No	No	K00026 MDH2	malate dehydrogenase [EC:1.1.1.37]
LOC_Os12g43630	No	No	Yes	No	No	No	No	No	No	No	No	No	K00026 MDH2	malate dehydrogenase [EC:1.1.1.37]
00720 Carbon fixation pathways in prokaryotes [PATH:ko00720]	No	No	No	No	No	No	No	No	No	No	No	No
LOC_Os08g09200	No	No	Yes	No	No	No	No	No	No	No	No	No	K01681 ACO, acnA	aconitate hydratase 1 / homoaconitase [EC:4.2.1.3 4.2.1.-]
00680 Methane metabolism [PATH:ko00680]	No	No	No	No	No	No	No	No	No	No	No	No
LOC_Os03g09020	No	No	Yes	No	No	No	No	No	Yes	No	No	No	K00121 frmA, ADH5, adhC	S-(hydroxymethyl)glutathione dehydrogenase / alcohol dehydrogenase [EC:1.1.1.284 1.1.1.1]
LOC_Os06g40640	No	No	No	No	No	Yes	No	No	No	Yes	No	No	K01623 ALDO	fructose-bisphosphate aldolase, class I [EC:4.1.2.13]
LOC_Os12g07210	No	No	No	Yes	No	No	No	No	No	No	No	No	K01623 ALDO	fructose-bisphosphate aldolase, class I [EC:4.1.2.13]
LOC_Os01g09570	No	Yes	No	No	No	No	No	No	No	No	No	No	K00850 pfkA, PFK	6-phosphofructokinase 1 [EC:2.7.1.11]
LOC_Os02g51590	No	Yes	No	No	No	No	No	Yes	No	No	No	No	K01834 PGAM, gpmA	2,3-bisphosphoglycerate-dependent phosphoglycerate mutase [EC:5.4.2.1]
00910 Nitrogen metabolism [PATH:ko00910]	No	No	No	No	No	No	No	No	No	No	No	No
LOC_Os01g45274	No	No	No	No	No	Yes	No	No	No	Yes	No	No	K01673 cynT, can	carbonic anhydrase [EC:4.2.1.1]
LOC_Os09g28910	No	Yes	Yes	No	No	No	No	Yes	No	No	No	No	K01673 cynT, can	carbonic anhydrase [EC:4.2.1.1]
LOC_Os01g25484	No	No	No	No	No	Yes	No	No	No	No	No	No	K00366 nirA	ferredoxin-nitrite reductase [EC:1.7.7.1]
LOC_Os01g25520	No	No	No	Yes	No	No	No	No	No	No	No	No	K00366 nirA	ferredoxin-nitrite reductase [EC:1.7.7.1]
LOC_Os02g52730	No	No	No	No	No	Yes	No	No	No	No	No	No	K00366 nirA	ferredoxin-nitrite reductase [EC:1.7.7.1]
LOC_Os02g43470	No	No	Yes	No	No	No	No	No	No	No	No	No	K00261 E1.4.1.3	glutamate dehydrogenase (NAD(P)+) [EC:1.4.1.3]
LOC_Os04g45970	No	No	Yes	No	No	No	No	No	No	No	No	No	K00261 E1.4.1.3	glutamate dehydrogenase (NAD(P)+) [EC:1.4.1.3]
LOC_Os03g61920	No	No	Yes	No	No	No	No	No	No	No	No	No	K03522 fixB, etfA	electron transfer flavoprotein alpha subunit
00920 Sulfur metabolism [PATH:ko00920]	No	No	No	No	No	No	No	No	No	No	No	No
LOC_Os03g08660	No	No	Yes	No	No	No	No	No	No	No	No	No	K00640 cysE	serine O-acetyltransferase [EC:2.3.1.30]
LOC_Os05g45710	No	Yes	No	No	No	No	No	No	No	No	No	No	K00640 cysE	serine O-acetyltransferase [EC:2.3.1.30]
Lipid metabolism	No	No	No	No	No	No	No	No	No	No	No	No
00061 Fatty acid biosynthesis [PATH:ko00061]	No	No	No	No	No	No	No	No	No	No	No	No
LOC_Os03g53690	Yes	No	No	No	No	No	No	No	No	No	No	No	K00059 fabG	3-oxoacyl-[acyl-carrier protein] reductase [EC:1.1.1.100]
LOC_Os07g37420	No	No	No	No	No	Yes	No	Yes	No	No	No	No	K00059 fabG	3-oxoacyl-[acyl-carrier protein] reductase [EC:1.1.1.100]
LOC_Os06g05130	Yes	No	No	No	No	No	Yes	No	No	No	No	No	K10781 FATB	fatty acyl-ACP thioesterase B [EC:3.1.2.14 3.1.2.-]
00062 Fatty acid elongation [PATH:ko00062]	No	No	No	No	No	No	No	No	No	No	No	No
LOC_Os02g11070	No	No	No	Yes	No	No	No	No	No	No	No	No	K15397 KCS	3-ketoacyl-CoA synthase [EC:2.3.1.199]
LOC_Os02g49920	No	Yes	No	No	No	No	No	Yes	No	No	No	No	K15397 KCS	3-ketoacyl-CoA synthase [EC:2.3.1.199]
LOC_Os03g08360	No	No	No	No	No	Yes	No	Yes	No	Yes	No	No	K15397 KCS	3-ketoacyl-CoA synthase [EC:2.3.1.199]
LOC_Os04g02640	No	No	No	Yes	No	No	No	No	No	No	No	No	K15397 KCS	3-ketoacyl-CoA synthase [EC:2.3.1.199]
LOC_Os05g49900	No	No	No	No	Yes	No	No	No	Yes	No	No	No	K15397 KCS	3-ketoacyl-CoA synthase [EC:2.3.1.199]
LOC_Os06g39750	No	No	No	No	No	Yes	No	Yes	No	No	No	No	K15397 KCS	3-ketoacyl-CoA synthase [EC:2.3.1.199]
LOC_Os10g07010	No	No	Yes	No	No	No	No	No	Yes	No	No	No	K15397 KCS	3-ketoacyl-CoA synthase [EC:2.3.1.199]
00071 Fatty acid metabolism [PATH:ko00071]	No	No	No	No	No	No	No	No	No	No	No	No
LOC_Os02g57260	No	No	Yes	No	No	No	No	No	No	No	No	No	K07513 ACAA1	acetyl-CoA acyltransferase 1 [EC:2.3.1.16]
LOC_Os06g24704	No	No	Yes	No	No	No	No	No	No	No	No	No	K00232 E1.3.3.6, ACOX1, ACOX3	acyl-CoA oxidase [EC:1.3.3.6]
LOC_Os11g39220	No	No	Yes	No	No	No	No	No	Yes	No	No	No	K00232 E1.3.3.6, ACOX1, ACOX3	acyl-CoA oxidase [EC:1.3.3.6]
LOC_Os01g48910	No	No	Yes	No	No	No	No	No	No	No	No	No	K01897 ACSL, fadD	long-chain acyl-CoA synthetase [EC:6.2.1.3]
LOC_Os05g04170	No	No	No	No	No	Yes	No	Yes	No	No	No	No	K01897 ACSL, fadD	long-chain acyl-CoA synthetase [EC:6.2.1.3]
LOC_Os05g25310	No	Yes	No	No	No	No	No	Yes	No	No	No	No	K01897 ACSL, fadD	long-chain acyl-CoA synthetase [EC:6.2.1.3]
LOC_Os12g04990	No	No	Yes	No	No	No	No	No	No	No	No	No	K01897 ACSL, fadD	long-chain acyl-CoA synthetase [EC:6.2.1.3]
LOC_Os03g09020	No	No	Yes	No	No	No	No	No	Yes	No	No	No	K00121 frmA, ADH5, adhC	S-(hydroxymethyl)glutathione dehydrogenase / alcohol dehydrogenase [EC:1.1.1.284 1.1.1.1]
LOC_Os10g07229	No	Yes	No	No	No	No	No	No	No	No	No	No	K00001 E1.1.1.1, adh	alcohol dehydrogenase [EC:1.1.1.1]
LOC_Os02g43194	No	No	No	No	No	Yes	No	Yes	No	Yes	No	No	K00128 E1.2.1.3	aldehyde dehydrogenase (NAD+) [EC:1.2.1.3]
LOC_Os02g43280	No	Yes	No	No	No	No	No	Yes	No	No	No	No	K00128 E1.2.1.3	aldehyde dehydrogenase (NAD+) [EC:1.2.1.3]
00072 Synthesis and degradation of ketone bodies [PATH:ko00072]	No	No	No	No	No	No	No	No	No	No	No	No
LOC_Os01g16350	No	No	Yes	No	No	No	No	No	Yes	No	No	No	K01640 E4.1.3.4, HMGCL, hmgL	hydroxymethylglutaryl-CoA lyase [EC:4.1.3.4]
00073 Cutin, suberine and wax biosynthesis [PATH:ko00073]	No	No	No	No	No	No	No	No	No	No	No	No
LOC_Os02g40784	No	No	Yes	No	No	No	No	No	Yes	No	No	No	K15404 K15404, CER1	aldehyde decarbonylase [EC:4.1.99.5]
LOC_Os08g44360	No	No	No	No	Yes	No	No	No	No	No	Yes	Yes	K13356 FAR	fatty acyl-CoA reductase [EC:1.2.1.-]
00100 Steroid biosynthesis [PATH:ko00100]	No	No	No	No	No	No	No	No	No	No	No	No
LOC_Os02g02230	No	No	Yes	No	No	No	No	No	No	No	No	No	K05917 CYP51	cytochrome P450, family 51 (sterol 14-demethylase) [EC:1.14.13.70]
LOC_Os02g21810	No	No	No	No	No	Yes	No	No	No	No	No	No	K05917 CYP51	cytochrome P450, family 51 (sterol 14-demethylase) [EC:1.14.13.70]
LOC_Os03g59620	No	No	Yes	No	No	No	No	No	No	No	No	No	K14674 TGL4	TAG lipase / steryl ester hydrolase / phospholipase A2 / LPA acyltransferase [EC:3.1.1.3 3.1.1.13 3.1.1.4 2.3.1.51]
LOC_Os11g48020	No	Yes	No	No	No	No	No	Yes	No	No	No	No	K14424 SMO2	4-alpha-methyl-delta7-sterol-4alpha-methyl oxidase [EC:1.14.13.72]
LOC_Os01g11340	No	Yes	No	No	No	No	No	Yes	No	No	No	No	K09832 CYP710A	cytochrome P450, family 710, subfamily A
00120 Primary bile acid biosynthesis [PATH:ko00120]	No	No	No	No	No	No	No	No	No	No	No	No
00121 Secondary bile acid biosynthesis [PATH:ko00121]	No	No	No	No	No	No	No	No	No	No	No	No
00140 Steroid hormone biosynthesis [PATH:ko00140]	No	No	No	No	No	No	No	No	No	No	No	No
00561 Glycerolipid metabolism [PATH:ko00561]	No	No	No	No	No	No	No	No	No	No	No	No
LOC_Os02g43194	No	No	No	No	No	Yes	No	Yes	No	Yes	No	No	K00128 E1.2.1.3	aldehyde dehydrogenase (NAD+) [EC:1.2.1.3]
LOC_Os02g43280	No	Yes	No	No	No	No	No	Yes	No	No	No	No	K00128 E1.2.1.3	aldehyde dehydrogenase (NAD+) [EC:1.2.1.3]
LOC_Os05g38230	No	No	No	Yes	No	No	No	No	No	No	No	No	K00002 E1.1.1.2, adh	alcohol dehydrogenase (NADP+) [EC:1.1.1.2]
LOC_Os04g55410	No	No	Yes	No	No	No	No	No	No	No	No	No	K00864 E2.7.1.30, glpK	glycerol kinase [EC:2.7.1.30]
LOC_Os01g44069	No	Yes	No	No	No	No	No	No	No	No	No	No	K13508 GPAT	glycerol-3-phosphate acyltransferase [EC:2.3.1.15]
LOC_Os01g63580	No	No	Yes	No	No	No	No	No	No	No	No	No	K13508 GPAT	glycerol-3-phosphate acyltransferase [EC:2.3.1.15]
LOC_Os11g45400	No	No	Yes	No	No	No	No	No	No	No	No	No	K13508 GPAT	glycerol-3-phosphate acyltransferase [EC:2.3.1.15]
LOC_Os03g59620	No	No	Yes	No	No	No	No	No	No	No	No	No	K14674 TGL4	TAG lipase / steryl ester hydrolase / phospholipase A2 / LPA acyltransferase [EC:3.1.1.3 3.1.1.13 3.1.1.4 2.3.1.51]
LOC_Os02g55910	Yes	No	No	No	No	No	Yes	No	No	No	No	No	K03715 E2.4.1.46	1,2-diacylglycerol 3-beta-galactosyltransferase [EC:2.4.1.46]
LOC_Os03g16140	No	Yes	No	No	No	No	No	Yes	No	No	No	No	K09480 E2.4.1.241	digalactosyldiacylglycerol synthase [EC:2.4.1.241]
LOC_Os07g48160	No	No	Yes	No	No	No	No	No	Yes	No	No	No	K07407 E3.2.1.22B, galA, rafA	alpha-galactosidase [EC:3.2.1.22]
00564 Glycerophospholipid metabolism [PATH:ko00564]	No	No	No	No	No	No	No	No	No	No	No	No
LOC_Os01g44069	No	Yes	No	No	No	No	No	No	No	No	No	No	K13508 GPAT	glycerol-3-phosphate acyltransferase [EC:2.3.1.15]
LOC_Os01g63580	No	No	Yes	No	No	No	No	No	No	No	No	No	K13508 GPAT	glycerol-3-phosphate acyltransferase [EC:2.3.1.15]
LOC_Os11g45400	No	No	Yes	No	No	No	No	No	No	No	No	No	K13508 GPAT	glycerol-3-phosphate acyltransferase [EC:2.3.1.15]
LOC_Os01g01190	Yes	No	No	No	No	No	No	No	No	No	No	No	K01114 plcC	phospholipase C [EC:3.1.4.3]
LOC_Os03g63580	No	No	Yes	No	No	No	No	No	Yes	No	No	No	K01114 plcC	phospholipase C [EC:3.1.4.3]
LOC_Os05g07880	No	No	No	Yes	No	No	No	No	No	No	No	No	K01115 PLD1_2	phospholipase D1/2 [EC:3.1.4.4]
LOC_Os06g40180	No	No	No	Yes	No	No	No	No	No	No	No	No	K01115 PLD1_2	phospholipase D1/2 [EC:3.1.4.4]
LOC_Os03g59620	No	No	Yes	No	No	No	No	No	No	No	No	No	K14674 TGL4	TAG lipase / steryl ester hydrolase / phospholipase A2 / LPA acyltransferase [EC:3.1.1.3 3.1.1.13 3.1.1.4 2.3.1.51]
LOC_Os03g40670	No	Yes	No	No	No	No	No	Yes	No	No	No	No	K01126 E3.1.4.46, glpQ, ugpQ	glycerophosphoryl diester phosphodiesterase [EC:3.1.4.46]
LOC_Os08g12830	Yes	No	No	No	No	No	Yes	No	No	No	No	No	K00967 PCYT2	ethaNolamine-phosphate cytidylyltransferase [EC:2.7.7.14]
00565 Ether lipid metabolism [PATH:ko00565]	No	No	No	No	No	No	No	No	No	No	No	No
LOC_Os03g59620	No	No	Yes	No	No	No	No	No	No	No	No	No	K14674 TGL4	TAG lipase / steryl ester hydrolase / phospholipase A2 / LPA acyltransferase [EC:3.1.1.3 3.1.1.13 3.1.1.4 2.3.1.51]
LOC_Os01g01190	Yes	No	No	No	No	No	No	No	No	No	No	No	K01114 plcC	phospholipase C [EC:3.1.4.3]
LOC_Os03g63580	No	No	Yes	No	No	No	No	No	Yes	No	No	No	K01114 plcC	phospholipase C [EC:3.1.4.3]
LOC_Os05g07880	No	No	No	Yes	No	No	No	No	No	No	No	No	K01115 PLD1_2	phospholipase D1/2 [EC:3.1.4.4]
LOC_Os06g40180	No	No	No	Yes	No	No	No	No	No	No	No	No	K01115 PLD1_2	phospholipase D1/2 [EC:3.1.4.4]
00600 Sphingolipid metabolism [PATH:ko00600]	No	No	No	No	No	No	No	No	No	No	No	No
LOC_Os02g47350	No	Yes	No	No	No	No	No	No	No	No	No	No	K04708 E1.1.1.102	3-dehydrosphinganine reductase [EC:1.1.1.102]
LOC_Os07g48160	No	No	Yes	No	No	No	No	No	Yes	No	No	No	K07407 E3.2.1.22B, galA, rafA	alpha-galactosidase [EC:3.2.1.22]
00590 Arachidonic acid metabolism [PATH:ko00590]	No	No	No	No	No	No	No	No	No	No	No	No
LOC_Os03g59620	No	No	Yes	No	No	No	No	No	No	No	No	No	K14674 TGL4	TAG lipase / steryl ester hydrolase / phospholipase A2 / LPA acyltransferase [EC:3.1.1.3 3.1.1.13 3.1.1.4 2.3.1.51]
LOC_Os01g05810	No	No	Yes	No	No	No	No	No	Yes	No	No	No	K00681 ggt	gamma-glutamyltranspeptidase [EC:2.3.2.2]
00591 LiNoleic acid metabolism [PATH:ko00591]	No	No	No	No	No	No	No	No	No	No	No	No
LOC_Os03g59620	No	No	Yes	No	No	No	No	No	No	No	No	No	K14674 TGL4	TAG lipase / steryl ester hydrolase / phospholipase A2 / LPA acyltransferase [EC:3.1.1.3 3.1.1.13 3.1.1.4 2.3.1.51]
LOC_Os03g49380	No	No	Yes	No	No	No	No	No	Yes	No	No	No	K15718 LOX1_5	liNoleate 9S-lipoxygenase [EC:1.13.11.58]
LOC_Os02g10120	No	Yes	No	No	No	No	No	No	No	No	No	No	K00454 LOX2S	lipoxygenase [EC:1.13.11.12]
LOC_Os04g37430	No	No	No	Yes	No	No	No	No	No	No	No	No	K00454 LOX2S	lipoxygenase [EC:1.13.11.12]
LOC_Os08g39840	No	No	No	Yes	No	No	No	No	No	No	No	No	K00454 LOX2S	lipoxygenase [EC:1.13.11.12]
00592 alpha-LiNolenic acid metabolism [PATH:ko00592]	No	No	No	No	No	No	No	No	No	No	No	No
LOC_Os03g59620	No	No	Yes	No	No	No	No	No	No	No	No	No	K14674 TGL4	TAG lipase / steryl ester hydrolase / phospholipase A2 / LPA acyltransferase [EC:3.1.1.3 3.1.1.13 3.1.1.4 2.3.1.51]
LOC_Os02g10120	No	Yes	No	No	No	No	No	No	No	No	No	No	K00454 LOX2S	lipoxygenase [EC:1.13.11.12]
LOC_Os04g37430	No	No	No	Yes	No	No	No	No	No	No	No	No	K00454 LOX2S	lipoxygenase [EC:1.13.11.12]
LOC_Os08g39840	No	No	No	Yes	No	No	No	No	No	No	No	No	K00454 LOX2S	lipoxygenase [EC:1.13.11.12]
LOC_Os03g55800	No	No	No	Yes	No	No	No	No	No	No	No	No	K01723 AOS	hydroperoxide dehydratase [EC:4.2.1.92]
LOC_Os03g32314	No	Yes	No	No	No	No	No	Yes	No	No	No	No	K10525 E5.3.99.6, aoc	allene oxide cyclase [EC:5.3.99.6]
LOC_Os06g11290	Yes	No	No	No	No	No	Yes	No	No	No	No	No	K05894 E1.3.1.42	12-oxophytodieNoic acid reductase [EC:1.3.1.42]
LOC_Os06g24704	No	No	Yes	No	No	No	No	No	No	No	No	No	K00232 E1.3.3.6, ACOX1, ACOX3	acyl-CoA oxidase [EC:1.3.3.6]
LOC_Os11g39220	No	No	Yes	No	No	No	No	No	Yes	No	No	No	K00232 E1.3.3.6, ACOX1, ACOX3	acyl-CoA oxidase [EC:1.3.3.6]
LOC_Os02g57260	No	No	Yes	No	No	No	No	No	No	No	No	No	K07513 ACAA1	acetyl-CoA acyltransferase 1 [EC:2.3.1.16]
LOC_Os02g02000	No	No	No	No	No	Yes	No	No	No	Yes	No	No	K10528 HPL	hydroperoxide lyase [EC:4.1.2.-]
01040 Biosynthesis of unsaturated fatty acids [PATH:ko01040]	No	No	No	No	No	No	No	No	No	No	No	No
LOC_Os03g53690	Yes	No	No	No	No	No	No	No	No	No	No	No	K00059 fabG	3-oxoacyl-[acyl-carrier protein] reductase [EC:1.1.1.100]
LOC_Os07g37420	No	No	No	No	No	Yes	No	Yes	No	No	No	No	K00059 fabG	3-oxoacyl-[acyl-carrier protein] reductase [EC:1.1.1.100]
LOC_Os07g23410	No	No	Yes	No	No	No	No	No	No	No	No	No	K10256 FAD2	omega-6 fatty acid desaturase (delta-12 desaturase) [EC:1.14.19.-]
LOC_Os03g18070	No	No	No	Yes	No	No	No	No	No	Yes	No	No	K10257 FAD8, desB	omega-3 fatty acid desaturase (delta-15 desaturase) [EC:1.14.19.-]
LOC_Os06g24704	No	No	Yes	No	No	No	No	No	No	No	No	No	K00232 E1.3.3.6, ACOX1, ACOX3	acyl-CoA oxidase [EC:1.3.3.6]
LOC_Os11g39220	No	No	Yes	No	No	No	No	No	Yes	No	No	No	K00232 E1.3.3.6, ACOX1, ACOX3	acyl-CoA oxidase [EC:1.3.3.6]
LOC_Os02g57260	No	No	Yes	No	No	No	No	No	No	No	No	No	K07513 ACAA1	acetyl-CoA acyltransferase 1 [EC:2.3.1.16]
01004 Lipid biosynthesis proteins [BR:ko01004]	No	No	No	No	No	No	No	No	No	No	No	No
Nucleotide metabolism	No	No	No	No	No	No	No	No	No	No	No	No
00230 Purine metabolism [PATH:ko00230]	No	No	No	No	No	No	No	No	No	No	No	No
LOC_Os01g65260	No	No	No	Yes	No	No	No	No	No	No	No	No	K00764 purF, PPAT	amidophosphoribosyltransferase [EC:2.4.2.14]
LOC_Os08g09210	No	Yes	No	No	No	No	No	No	No	No	No	No	K01945 purD	phosphoribosylamine--glycine ligase [EC:6.3.4.13]
LOC_Os06g22560	No	Yes	No	No	No	No	No	No	No	No	No	No	K00601 E2.1.2.2	phosphoribosylglycinamide formyltransferase [EC:2.1.2.2]
LOC_Os08g39160	No	Yes	No	No	No	No	No	Yes	No	No	No	No	K00601 E2.1.2.2	phosphoribosylglycinamide formyltransferase [EC:2.1.2.2]
LOC_Os08g20090	No	Yes	No	No	No	No	No	No	No	No	No	No	K03043 rpoB	DNA-directed RNA polymerase subunit beta [EC:2.7.7.6]
LOC_Os12g23570	Yes	No	No	No	No	No	No	No	No	No	No	No	K03043 rpoB	DNA-directed RNA polymerase subunit beta [EC:2.7.7.6]
LOC_Os05g05860	Yes	No	No	No	No	No	Yes	No	No	No	No	No	K03006 RPB1, POLR2A	DNA-directed RNA polymerase II subunit RPB1 [EC:2.7.7.6]
LOC_Os11g45080	Yes	No	No	No	No	No	No	No	No	No	No	No	K03017 RPB9, POLR2I	DNA-directed RNA polymerase II subunit RPB9
LOC_Os12g37370	No	Yes	No	No	No	No	No	Yes	No	No	No	No	K03017 RPB9, POLR2I	DNA-directed RNA polymerase II subunit RPB9
LOC_Os01g34614	No	Yes	No	No	No	No	No	Yes	No	No	No	No	K03009 RPB12, POLR2K	DNA-directed RNA polymerases I, II, and III subunit RPABC4
LOC_Os07g46630	No	Yes	Yes	No	No	No	No	No	No	No	No	No	K01488 E3.5.4.4, ADA, add	adeNosine deaminase [EC:3.5.4.4]
LOC_Os01g64520	No	No	Yes	No	No	No	No	No	No	No	No	No	K00365 E1.7.3.3	urate oxidase [EC:1.7.3.3]
00240 Pyrimidine metabolism [PATH:ko00240]	No	No	No	No	No	No	No	No	No	No	No	No
LOC_Os02g47850	No	Yes	No	No	No	No	No	Yes	No	No	No	No	K01956 carA, CPA1	carbamoyl-phosphate synthase small subunit [EC:6.3.5.5]
LOC_Os08g20090	No	Yes	No	No	No	No	No	No	No	No	No	No	K03043 rpoB	DNA-directed RNA polymerase subunit beta [EC:2.7.7.6]
LOC_Os12g23570	Yes	No	No	No	No	No	No	No	No	No	No	No	K03043 rpoB	DNA-directed RNA polymerase subunit beta [EC:2.7.7.6]
LOC_Os05g05860	Yes	No	No	No	No	No	Yes	No	No	No	No	No	K03006 RPB1, POLR2A	DNA-directed RNA polymerase II subunit RPB1 [EC:2.7.7.6]
LOC_Os11g45080	Yes	No	No	No	No	No	No	No	No	No	No	No	K03017 RPB9, POLR2I	DNA-directed RNA polymerase II subunit RPB9
LOC_Os12g37370	No	Yes	No	No	No	No	No	Yes	No	No	No	No	K03017 RPB9, POLR2I	DNA-directed RNA polymerase II subunit RPB9
LOC_Os01g34614	No	Yes	No	No	No	No	No	Yes	No	No	No	No	K03009 RPB12, POLR2K	DNA-directed RNA polymerases I, II, and III subunit RPABC4
LOC_Os02g50350	No	No	Yes	No	No	No	No	No	Yes	No	No	No	K00207 E1.3.1.2, DPYD	dihydropyrimidine dehydrogenase (NADP+) [EC:1.3.1.2]
LOC_Os07g30170	No	No	Yes	No	No	No	No	No	Yes	No	No	No	K01431 E3.5.1.6	beta-ureidopropionase [EC:3.5.1.6]
LOC_Os11g29390	No	Yes	No	No	No	No	No	No	No	No	No	No	K13998 DHFR-TS	dihydrofolate reductase / thymidylate synthase [EC:1.5.1.3 2.1.1.45]
LOC_Os01g51540	No	No	Yes	No	No	No	No	No	No	No	No	No	K01489 E3.5.4.5, cdd	cytidine deaminase [EC:3.5.4.5]
AmiNo acid metabolism	No	No	No	No	No	No	No	No	No	No	No	No
00250 Alanine, aspartate and glutamate metabolism [PATH:ko00250]	No	No	No	No	No	No	No	No	No	No	No	No
LOC_Os02g04170	No	No	No	Yes	No	No	No	No	No	Yes	No	No	K00278 nadB	L-aspartate oxidase [EC:1.4.3.16]
LOC_Os10g25140	No	No	Yes	No	No	No	No	No	No	No	No	No	K00814 GPT, ALT	alanine transaminase [EC:2.6.1.2]
LOC_Os03g07570	No	Yes	No	No	No	No	No	Yes	No	No	No	No	K00827 AGXT2	alanine-glyoxylate transaminase / (R)-3-amiNo-2-methylpropionate-pyruvate transaminase [EC:2.6.1.44 2.6.1.40]
LOC_Os03g51080	No	No	Yes	No	No	No	No	No	No	No	No	No	K01580 E4.1.1.15, gadB, gadA, GAD	glutamate decarboxylase [EC:4.1.1.15]
LOC_Os04g37500	No	No	Yes	No	No	No	No	No	No	No	No	No	K01580 E4.1.1.15, gadB, gadA, GAD	glutamate decarboxylase [EC:4.1.1.15]
LOC_Os08g36320	No	Yes	No	No	No	No	No	Yes	No	No	No	No	K01580 E4.1.1.15, gadB, gadA, GAD	glutamate decarboxylase [EC:4.1.1.15]
LOC_Os02g43470	No	No	Yes	No	No	No	No	No	No	No	No	No	K00261 E1.4.1.3	glutamate dehydrogenase (NAD(P)+) [EC:1.4.1.3]
LOC_Os04g45970	No	No	Yes	No	No	No	No	No	No	No	No	No	K00261 E1.4.1.3	glutamate dehydrogenase (NAD(P)+) [EC:1.4.1.3]
LOC_Os02g47850	No	Yes	No	No	No	No	No	Yes	No	No	No	No	K01956 carA, CPA1	carbamoyl-phosphate synthase small subunit [EC:6.3.5.5]
LOC_Os01g65260	No	No	No	Yes	No	No	No	No	No	No	No	No	K00764 purF, PPAT	amidophosphoribosyltransferase [EC:2.4.2.14]
00260 Glycine, serine and threonine metabolism [PATH:ko00260]	No	No	No	No	No	No	No	No	No	No	No	No
LOC_Os05g47640	No	Yes	No	No	No	No	No	Yes	No	No	No	No	K01733 thrC	threonine synthase [EC:4.2.3.1]
LOC_Os02g51590	No	Yes	No	No	No	No	No	Yes	No	No	No	No	K01834 PGAM, gpmA	2,3-bisphosphoglycerate-dependent phosphoglycerate mutase [EC:5.4.2.1]
LOC_Os01g12830	No	Yes	No	No	No	No	No	No	No	No	No	No	K15919 HPR2	hydroxypyruvate reductase 2
LOC_Os03g07570	No	Yes	No	No	No	No	No	Yes	No	No	No	No	K00827 AGXT2	alanine-glyoxylate transaminase / (R)-3-amiNo-2-methylpropionate-pyruvate transaminase [EC:2.6.1.44 2.6.1.40]
00270 Cysteine and methionine metabolism [PATH:ko00270]	No	No	No	No	No	No	No	No	No	No	No	No
LOC_Os03g08660	No	No	Yes	No	No	No	No	No	No	No	No	No	K00640 cysE	serine O-acetyltransferase [EC:2.3.1.30]
LOC_Os05g45710	No	Yes	No	No	No	No	No	No	No	No	No	No	K00640 cysE	serine O-acetyltransferase [EC:2.3.1.30]
LOC_Os01g01120	No	Yes	No	No	No	No	No	Yes	No	No	No	No	K09880 mtnC, ENoPH1	eNolase-phosphatase E1 [EC:3.1.3.77]
LOC_Os03g51740	No	No	No	No	No	Yes	No	No	No	No	No	No	K01762 ACS	1-amiNocyclopropane-1-carboxylate synthase [EC:4.4.1.14]
LOC_Os04g48850	No	Yes	No	No	No	No	No	No	No	No	No	No	K01762 ACS	1-amiNocyclopropane-1-carboxylate synthase [EC:4.4.1.14]
LOC_Os09g27750	No	No	No	No	No	Yes	No	No	No	No	No	No	K05933 E1.14.17.4	amiNocyclopropanecarboxylate oxidase [EC:1.14.17.4]
LOC_Os09g27820	No	No	No	No	No	Yes	No	No	No	No	No	No	K05933 E1.14.17.4	amiNocyclopropanecarboxylate oxidase [EC:1.14.17.4]
00280 Valine, leucine and isoleucine degradation [PATH:ko00280]	No	No	No	No	No	No	No	No	No	No	No	No
LOC_Os03g01600	No	No	Yes	No	No	No	No	No	No	No	No	No	K00826 E2.6.1.42, ilvE	branched-chain amiNo acid amiNotransferase [EC:2.6.1.42]
LOC_Os05g48450	No	Yes	No	No	No	No	No	Yes	No	No	No	No	K00826 E2.6.1.42, ilvE	branched-chain amiNo acid amiNotransferase [EC:2.6.1.42]
LOC_Os12g08260	No	Yes	Yes	No	No	No	No	Yes	Yes	No	No	No	K00166 E1.2.4.4A, bkdA1	2-oxoisovalerate dehydrogenase E1 component, alpha subunit [EC:1.2.4.4]
LOC_Os07g07470	No	No	Yes	No	No	No	No	No	No	No	No	No	K00167 E1.2.4.4B, bkdA2	2-oxoisovalerate dehydrogenase E1 component, beta subunit [EC:1.2.4.4]
LOC_Os01g21160	No	No	Yes	No	No	No	No	No	Yes	No	No	No	K09699 E2.3.1.168, bkdB	2-oxoisovalerate dehydrogenase E2 component (dihydrolipoyl transacylase) [EC:2.3.1.168]
LOC_Os02g57260	No	No	Yes	No	No	No	No	No	No	No	No	No	K07513 ACAA1	acetyl-CoA acyltransferase 1 [EC:2.3.1.16]
LOC_Os02g43194	No	No	No	No	No	Yes	No	Yes	No	Yes	No	No	K00128 E1.2.1.3	aldehyde dehydrogenase (NAD+) [EC:1.2.1.3]
LOC_Os02g43280	No	Yes	No	No	No	No	No	Yes	No	No	No	No	K00128 E1.2.1.3	aldehyde dehydrogenase (NAD+) [EC:1.2.1.3]
LOC_Os12g41250	No	No	Yes	No	No	No	No	No	No	No	No	No	K01968 E6.4.1.4A	3-methylcrotonyl-CoA carboxylase alpha subunit [EC:6.4.1.4]
LOC_Os01g16350	No	No	Yes	No	No	No	No	No	Yes	No	No	No	K01640 E4.1.3.4, HMGCL, hmgL	hydroxymethylglutaryl-CoA lyase [EC:4.1.3.4]
00290 Valine, leucine and isoleucine biosynthesis [PATH:ko00290]	No	No	No	No	No	No	No	No	No	No	No	No
LOC_Os04g32010	No	No	No	Yes	No	No	No	No	No	No	No	No	K01652 E2.2.1.6L, ilvB, ilvG, ilvI	acetolactate synthase I/II/III large subunit [EC:2.2.1.6]
LOC_Os03g01600	No	No	Yes	No	No	No	No	No	No	No	No	No	K00826 E2.6.1.42, ilvE	branched-chain amiNo acid amiNotransferase [EC:2.6.1.42]
LOC_Os05g48450	No	Yes	No	No	No	No	No	Yes	No	No	No	No	K00826 E2.6.1.42, ilvE	branched-chain amiNo acid amiNotransferase [EC:2.6.1.42]
00300 Lysine biosynthesis [PATH:ko00300]	No	No	No	No	No	No	No	No	No	No	No	No
LOC_Os02g24020	No	Yes	No	No	No	No	No	Yes	No	No	No	No	K00215 dapB	4-hydroxy-tetrahydrodipicolinate reductase [EC:1.17.1.8]
LOC_Os12g37960	No	Yes	No	No	No	No	No	Yes	No	No	No	No	K01778 dapF	diamiNopimelate epimerase [EC:5.1.1.7]
LOC_Os03g09910	No	No	Yes	No	No	No	No	No	No	No	No	No	K10206 E2.6.1.83	LL-diamiNopimelate amiNotransferase [EC:2.6.1.83]
LOC_Os08g09200	No	No	Yes	No	No	No	No	No	No	No	No	No	K01681 ACO, acnA	aconitate hydratase 1 / homoaconitase [EC:4.2.1.3 4.2.1.-]
00310 Lysine degradation [PATH:ko00310]	No	No	No	No	No	No	No	No	No	No	No	No
LOC_Os02g43194	No	No	No	No	No	Yes	No	Yes	No	Yes	No	No	K00128 E1.2.1.3	aldehyde dehydrogenase (NAD+) [EC:1.2.1.3]
LOC_Os02g43280	No	Yes	No	No	No	No	No	Yes	No	No	No	No	K00128 E1.2.1.3	aldehyde dehydrogenase (NAD+) [EC:1.2.1.3]
00330 Arginine and proline metabolism [PATH:ko00330]	No	No	No	No	No	No	No	No	No	No	No	No
LOC_Os02g28110	No	No	Yes	No	No	No	No	No	Yes	No	No	No	K01581 E4.1.1.17, ODC1, speC, speF	ornithine decarboxylase [EC:4.1.1.17]
LOC_Os02g43194	No	No	No	No	No	Yes	No	Yes	No	Yes	No	No	K00128 E1.2.1.3	aldehyde dehydrogenase (NAD+) [EC:1.2.1.3]
LOC_Os02g43280	No	Yes	No	No	No	No	No	Yes	No	No	No	No	K00128 E1.2.1.3	aldehyde dehydrogenase (NAD+) [EC:1.2.1.3]
LOC_Os05g43830	No	No	Yes	No	No	No	No	No	Yes	No	No	No	K01259 pip	proline imiNopeptidase [EC:3.4.11.5]
LOC_Os04g01590	No	No	Yes	No	No	No	No	No	No	No	No	No	K01476 E3.5.3.1, rocF, arg	arginase [EC:3.5.3.1]
LOC_Os02g43470	No	No	Yes	No	No	No	No	No	No	No	No	No	K00261 E1.4.1.3	glutamate dehydrogenase (NAD(P)+) [EC:1.4.1.3]
LOC_Os04g45970	No	No	Yes	No	No	No	No	No	No	No	No	No	K00261 E1.4.1.3	glutamate dehydrogenase (NAD(P)+) [EC:1.4.1.3]
00340 Histidine metabolism [PATH:ko00340]	No	No	No	No	No	No	No	No	No	No	No	No
LOC_Os02g43194	No	No	No	No	No	Yes	No	Yes	No	Yes	No	No	K00128 E1.2.1.3	aldehyde dehydrogenase (NAD+) [EC:1.2.1.3]
LOC_Os02g43280	No	Yes	No	No	No	No	No	Yes	No	No	No	No	K00128 E1.2.1.3	aldehyde dehydrogenase (NAD+) [EC:1.2.1.3]
00350 Tyrosine metabolism [PATH:ko00350]	No	No	No	No	No	No	No	No	No	No	No	No
LOC_Os02g10310	No	No	Yes	No	No	No	No	No	Yes	No	No	No	K01555 FAH, fahA	fumarylacetoacetase [EC:3.7.1.2]
LOC_Os01g56380	No	Yes	No	No	No	No	No	Yes	No	No	No	No	K01592 E4.1.1.25	tyrosine decarboxylase [EC:4.1.1.25]
LOC_Os08g04560	No	Yes	No	No	No	No	No	Yes	No	No	No	No	K01592 E4.1.1.25	tyrosine decarboxylase [EC:4.1.1.25]
LOC_Os03g09020	No	No	Yes	No	No	No	No	No	Yes	No	No	No	K00121 frmA, ADH5, adhC	S-(hydroxymethyl)glutathione dehydrogenase / alcohol dehydrogenase [EC:1.1.1.284 1.1.1.1]
LOC_Os10g07229	No	Yes	No	No	No	No	No	No	No	No	No	No	K00001 E1.1.1.1, adh	alcohol dehydrogenase [EC:1.1.1.1]
LOC_Os03g61330	No	No	Yes	No	No	No	No	No	No	No	No	No	K01557 FAHD1	acylpyruvate hydrolase [EC:3.7.1.5]
00360 Phenylalanine metabolism [PATH:ko00360]	No	No	No	No	No	No	No	No	No	No	No	No
LOC_Os07g44430	No	No	Yes	No	No	No	No	No	No	No	No	No	K11188 PRDX6	peroxiredoxin 6, 1-Cys peroxiredoxin [EC:1.11.1.7 1.11.1.15 3.1.1.-]
LOC_Os07g44440	No	No	Yes	No	No	No	No	No	No	No	No	No	K11188 PRDX6	peroxiredoxin 6, 1-Cys peroxiredoxin [EC:1.11.1.7 1.11.1.15 3.1.1.-]
LOC_Os01g15830	Yes	No	No	No	No	No	No	No	No	No	No	No	K00430 E1.11.1.7	peroxidase [EC:1.11.1.7]
LOC_Os03g55420	No	No	Yes	No	No	No	No	No	Yes	No	No	No	K00430 E1.11.1.7	peroxidase [EC:1.11.1.7]
LOC_Os04g53640	Yes	No	No	No	No	No	Yes	No	No	No	No	No	K00430 E1.11.1.7	peroxidase [EC:1.11.1.7]
LOC_Os07g02440	No	No	No	Yes	No	No	No	No	No	Yes	No	No	K00430 E1.11.1.7	peroxidase [EC:1.11.1.7]
LOC_Os07g47990	No	Yes	No	No	No	No	No	Yes	No	No	No	No	K00430 E1.11.1.7	peroxidase [EC:1.11.1.7]
LOC_Os07g49360	No	Yes	No	No	No	No	No	Yes	No	No	No	No	K00430 E1.11.1.7	peroxidase [EC:1.11.1.7]
LOC_Os08g02110	No	No	No	No	No	Yes	No	Yes	No	No	No	No	K00430 E1.11.1.7	peroxidase [EC:1.11.1.7]
LOC_Os09g29490	No	No	No	Yes	No	No	No	No	No	No	No	No	K00430 E1.11.1.7	peroxidase [EC:1.11.1.7]
LOC_Os05g35290	No	No	No	Yes	No	No	No	No	No	No	No	No	K10775 E4.3.1.24	phenylalanine ammonia-lyase [EC:4.3.1.24]
LOC_Os04g43760	No	No	No	Yes	No	No	No	No	No	Yes	No	No	K13064 PTAL	phenylalanine/tyrosine ammonia-lyase [EC:4.3.1.25]
LOC_Os02g46970	No	No	No	No	No	Yes	No	Yes	No	Yes	No	No	K01904 E6.2.1.12	4-coumarate--CoA ligase [EC:6.2.1.12]
00380 Tryptophan metabolism [PATH:ko00380]	No	No	No	No	No	No	No	No	No	No	No	No
LOC_Os02g43194	No	No	No	No	No	Yes	No	Yes	No	Yes	No	No	K00128 E1.2.1.3	aldehyde dehydrogenase (NAD+) [EC:1.2.1.3]
LOC_Os02g43280	No	Yes	No	No	No	No	No	Yes	No	No	No	No	K00128 E1.2.1.3	aldehyde dehydrogenase (NAD+) [EC:1.2.1.3]
LOC_Os06g51150	No	No	Yes	No	No	No	No	No	No	No	No	No	K03781 katE, CAT, catB, srpA	catalase [EC:1.11.1.6]
00400 Phenylalanine, tyrosine and tryptophan biosynthesis [PATH:ko00400]	No	No	No	No	No	No	No	No	No	No	No	No
LOC_Os07g42960	Yes	No	No	Yes	No	No	No	No	No	Yes	Yes	Yes	K01626 E2.5.1.54, aroF, aroG, aroH	3-deoxy-7-phosphoheptulonate synthase [EC:2.5.1.54]
LOC_Os04g33390	No	No	No	Yes	No	No	No	No	No	Yes	No	No	K05359 ADT, PDT	arogenate/prephenate dehydratase [EC:4.2.1.91 4.2.1.51]
01007 AmiNo acid related enzymes [BR:ko01007]	No	No	No	No	No	No	No	No	No	No	No	No
Metabolism of other amiNo acids	No	No	No	No	No	No	No	No	No	No	No	No
00410 beta-Alanine metabolism [PATH:ko00410]	No	No	No	No	No	No	No	No	No	No	No	No
LOC_Os03g51080	No	No	Yes	No	No	No	No	No	No	No	No	No	K01580 E4.1.1.15, gadB, gadA, GAD	glutamate decarboxylase [EC:4.1.1.15]
LOC_Os04g37500	No	No	Yes	No	No	No	No	No	No	No	No	No	K01580 E4.1.1.15, gadB, gadA, GAD	glutamate decarboxylase [EC:4.1.1.15]
LOC_Os08g36320	No	Yes	No	No	No	No	No	Yes	No	No	No	No	K01580 E4.1.1.15, gadB, gadA, GAD	glutamate decarboxylase [EC:4.1.1.15]
LOC_Os02g43194	No	No	No	No	No	Yes	No	Yes	No	Yes	No	No	K00128 E1.2.1.3	aldehyde dehydrogenase (NAD+) [EC:1.2.1.3]
LOC_Os02g43280	No	Yes	No	No	No	No	No	Yes	No	No	No	No	K00128 E1.2.1.3	aldehyde dehydrogenase (NAD+) [EC:1.2.1.3]
LOC_Os02g50350	No	No	Yes	No	No	No	No	No	Yes	No	No	No	K00207 E1.3.1.2, DPYD	dihydropyrimidine dehydrogenase (NADP+) [EC:1.3.1.2]
LOC_Os07g30170	No	No	Yes	No	No	No	No	No	Yes	No	No	No	K01431 E3.5.1.6	beta-ureidopropionase [EC:3.5.1.6]
00430 Taurine and hypotaurine metabolism [PATH:ko00430]	No	No	No	No	No	No	No	No	No	No	No	No
LOC_Os03g51080	No	No	Yes	No	No	No	No	No	No	No	No	No	K01580 E4.1.1.15, gadB, gadA, GAD	glutamate decarboxylase [EC:4.1.1.15]
LOC_Os04g37500	No	No	Yes	No	No	No	No	No	No	No	No	No	K01580 E4.1.1.15, gadB, gadA, GAD	glutamate decarboxylase [EC:4.1.1.15]
LOC_Os08g36320	No	Yes	No	No	No	No	No	Yes	No	No	No	No	K01580 E4.1.1.15, gadB, gadA, GAD	glutamate decarboxylase [EC:4.1.1.15]
LOC_Os01g05810	No	No	Yes	No	No	No	No	No	Yes	No	No	No	K00681 ggt	gamma-glutamyltranspeptidase [EC:2.3.2.2]
00440 Phosphonate and phosphinate metabolism [PATH:ko00440]	No	No	No	No	No	No	No	No	No	No	No	No
LOC_Os08g12830	Yes	No	No	No	No	No	Yes	No	No	No	No	No	K00967 PCYT2	ethaNolamine-phosphate cytidylyltransferase [EC:2.7.7.14]
00450 SeleNocompound metabolism [PATH:ko00450]	No	No	No	No	No	No	No	No	No	No	No	No
00460 CyaNoamiNo acid metabolism [PATH:ko00460]	No	No	No	No	No	No	No	No	No	No	No	No
LOC_Os04g39900	No	Yes	No	No	No	No	No	Yes	No	No	No	No	K01188 E3.2.1.21	beta-glucosidase [EC:3.2.1.21]
LOC_Os05g30350	No	Yes	No	No	No	No	No	Yes	No	No	No	No	K01188 E3.2.1.21	beta-glucosidase [EC:3.2.1.21]
LOC_Os10g17650	No	No	Yes	No	No	No	No	No	Yes	No	No	No	K01188 E3.2.1.21	beta-glucosidase [EC:3.2.1.21]
LOC_Os03g53790	Yes	No	No	No	No	No	No	No	No	No	No	No	K05349 bglX	beta-glucosidase [EC:3.2.1.21]
LOC_Os03g53800	No	No	Yes	No	No	No	No	No	No	No	No	No	K05349 bglX	beta-glucosidase [EC:3.2.1.21]
LOC_Os01g05810	No	No	Yes	No	No	No	No	No	Yes	No	No	No	K00681 ggt	gamma-glutamyltranspeptidase [EC:2.3.2.2]
00471 D-Glutamine and D-glutamate metabolism [PATH:ko00471]	No	No	No	No	No	No	No	No	No	No	No	No
LOC_Os02g43470	No	No	Yes	No	No	No	No	No	No	No	No	No	K00261 E1.4.1.3	glutamate dehydrogenase (NAD(P)+) [EC:1.4.1.3]
LOC_Os04g45970	No	No	Yes	No	No	No	No	No	No	No	No	No	K00261 E1.4.1.3	glutamate dehydrogenase (NAD(P)+) [EC:1.4.1.3]
00472 D-Arginine and D-ornithine metabolism [PATH:ko00472]	No	No	No	No	No	No	No	No	No	No	No	No
00473 D-Alanine metabolism [PATH:ko00473]	No	No	No	No	No	No	No	No	No	No	No	No
00480 Glutathione metabolism [PATH:ko00480]	No	No	No	No	No	No	No	No	No	No	No	No
LOC_Os01g05810	No	No	Yes	No	No	No	No	No	Yes	No	No	No	K00681 ggt	gamma-glutamyltranspeptidase [EC:2.3.2.2]
LOC_Os05g03820	No	No	Yes	No	No	No	No	No	No	No	No	No	K01919 gshA	glutamate--cysteine ligase [EC:6.3.2.2]
LOC_Os02g55140	No	No	Yes	No	No	No	No	No	No	No	No	No	K01255 CARP, pepA	leucyl amiNopeptidase [EC:3.4.11.1]
LOC_Os12g24650	No	No	Yes	No	No	No	No	No	No	No	No	No	K01255 CARP, pepA	leucyl amiNopeptidase [EC:3.4.11.1]
LOC_Os08g44860	No	No	Yes	No	No	No	No	No	No	No	No	No	K01256 pepN	amiNopeptidase N [EC:3.4.11.2]
LOC_Os01g27340	Yes	No	No	No	No	No	No	No	No	No	No	No	K00799 GST, gst	glutathione S-transferase [EC:2.5.1.18]
LOC_Os01g72120	No	No	Yes	No	No	No	No	No	No	No	No	No	K00799 GST, gst	glutathione S-transferase [EC:2.5.1.18]
LOC_Os01g72130	No	No	Yes	No	No	No	No	No	No	No	No	No	K00799 GST, gst	glutathione S-transferase [EC:2.5.1.18]
LOC_Os03g04260	No	Yes	No	No	No	No	No	No	No	No	No	No	K00799 GST, gst	glutathione S-transferase [EC:2.5.1.18]
LOC_Os03g50130	No	Yes	No	No	No	No	No	No	No	No	No	No	K00799 GST, gst	glutathione S-transferase [EC:2.5.1.18]
LOC_Os10g38580	No	No	No	No	No	Yes	No	Yes	No	Yes	Yes	No	K00799 GST, gst	glutathione S-transferase [EC:2.5.1.18]
LOC_Os10g38590	No	No	Yes	No	No	No	No	No	No	No	No	No	K00799 GST, gst	glutathione S-transferase [EC:2.5.1.18]
LOC_Os10g38700	No	Yes	No	No	No	No	No	Yes	No	No	No	No	K00799 GST, gst	glutathione S-transferase [EC:2.5.1.18]
LOC_Os10g38710	No	No	No	No	No	Yes	No	Yes	No	Yes	No	No	K00799 GST, gst	glutathione S-transferase [EC:2.5.1.18]
LOC_Os02g56850	No	Yes	No	No	No	No	No	No	No	No	No	No	K00383 E1.8.1.7, GSR, gor	glutathione reductase (NADPH) [EC:1.8.1.7]
LOC_Os02g28110	No	No	Yes	No	No	No	No	No	Yes	No	No	No	K01581 E4.1.1.17, ODC1, speC, speF	ornithine decarboxylase [EC:4.1.1.17]
Glycan biosynthesis and metabolism	No	No	No	No	No	No	No	No	No	No	No	No
01003 Glycosyltransferases [BR:ko01003]	No	No	No	No	No	No	No	No	No	No	No	No
00510 N-Glycan biosynthesis [PATH:ko00510]	No	No	No	No	No	No	No	No	No	No	No	No
LOC_Os03g36730	No	Yes	No	No	No	No	No	No	No	No	No	No	K12669 OST3, OST6	oligosaccharyltransferase complex subunit gamma
LOC_Os05g11850	No	Yes	No	No	No	No	No	Yes	No	No	No	No	K01230 MAN1	manNosyl-oligosaccharide alpha-1,2-manNosidase [EC:3.2.1.113]
LOC_Os02g38140	No	No	No	Yes	No	No	No	No	No	No	No	No	K00737 MGAT3	beta-1,4-manNosyl-glycoprotein beta-1,4-N-acetylglucosaminyltransferase [EC:2.4.1.144]
00513 Various types of N-glycan biosynthesis [PATH:ko00513]	No	No	No	No	No	No	No	No	No	No	No	No
LOC_Os03g36730	No	Yes	No	No	No	No	No	No	No	No	No	No	K12669 OST3, OST6	oligosaccharyltransferase complex subunit gamma
LOC_Os05g11850	No	Yes	No	No	No	No	No	Yes	No	No	No	No	K01230 MAN1	manNosyl-oligosaccharide alpha-1,2-manNosidase [EC:3.2.1.113]
LOC_Os08g39380	No	Yes	No	No	No	No	No	Yes	No	No	No	No	K03714 E2.4.2.38	glycoprotein 2-beta-D-xylosyltransferase [EC:2.4.2.38]
00512 Mucin type O-glycan biosynthesis [PATH:ko00512]	No	No	No	No	No	No	No	No	No	No	No	No
00514 Other types of O-glycan biosynthesis [PATH:ko00514]	No	No	No	No	No	No	No	No	No	No	No	No
LOC_Os07g38490	No	Yes	No	No	No	No	No	Yes	No	No	No	No	K03691 POFUT	peptide-O-fucosyltransferase [EC:2.4.1.221]
00532 GlycosamiNoglycan biosynthesis - chondroitin sulfate / dermatan sulfate [PATH:ko00532]	No	No	No	No	No	No	No	No	No	No	No	No
00534 GlycosamiNoglycan biosynthesis - heparan sulfate / heparin [PATH:ko00534]	No	No	No	No	No	No	No	No	No	No	No	No
00533 GlycosamiNoglycan biosynthesis - keratan sulfate [PATH:ko00533]	No	No	No	No	No	No	No	No	No	No	No	No
00535 Proteoglycans [BR:ko00535]	No	No	No	No	No	No	No	No	No	No	No	No
00536 Heparan sulfate/heparin binding proteins [BR:ko00536]	No	No	No	No	No	No	No	No	No	No	No	No
00531 GlycosamiNoglycan degradation [PATH:ko00531]	No	No	No	No	No	No	No	No	No	No	No	No
LOC_Os01g70550	No	No	Yes	No	No	No	No	No	No	No	No	No	K10532 HGSNAT	heparan-alpha-glucosaminide N-acetyltransferase [EC:2.3.1.78]
LOC_Os07g38790	No	No	No	Yes	No	No	No	No	No	Yes	No	No	K12373 HEXA_B	hexosaminidase [EC:3.2.1.52]
00563 GlycosylphosphatidyliNositol(GPI)-anchor biosynthesis [PATH:ko00563]	No	No	No	No	No	No	No	No	No	No	No	No
00601 Glycosphingolipid biosynthesis - lacto and neolacto series [PATH:ko00601]	No	No	No	No	No	No	No	No	No	No	No	No
00603 Glycosphingolipid biosynthesis - globo series [PATH:ko00603]	No	No	No	No	No	No	No	No	No	No	No	No
LOC_Os07g48160	No	No	Yes	No	No	No	No	No	Yes	No	No	No	K07407 E3.2.1.22B, galA, rafA	alpha-galactosidase [EC:3.2.1.22]
LOC_Os07g38790	No	No	No	Yes	No	No	No	No	No	Yes	No	No	K12373 HEXA_B	hexosaminidase [EC:3.2.1.52]
00604 Glycosphingolipid biosynthesis - ganglio series [PATH:ko00604]	No	No	No	No	No	No	No	No	No	No	No	No
LOC_Os07g38790	No	No	No	Yes	No	No	No	No	No	Yes	No	No	K12373 HEXA_B	hexosaminidase [EC:3.2.1.52]
00540 Lipopolysaccharide biosynthesis [PATH:ko00540]	No	No	No	No	No	No	No	No	No	No	No	No
01005 Lipopolysaccharide biosynthesis proteins [BR:ko01005]	No	No	No	No	No	No	No	No	No	No	No	No
00550 Peptidoglycan biosynthesis [PATH:ko00550]	No	No	No	No	No	No	No	No	No	No	No	No
00511 Other glycan degradation [PATH:ko00511]	No	No	No	No	No	No	No	No	No	No	No	No
LOC_Os07g38790	No	No	No	Yes	No	No	No	No	No	Yes	No	No	K12373 HEXA_B	hexosaminidase [EC:3.2.1.52]
LOC_Os04g47280	No	Yes	No	No	No	No	No	Yes	No	No	No	No	K01206 FUCA	alpha-L-fucosidase [EC:3.2.1.51]
LOC_Os09g34920	No	No	Yes	No	No	No	No	No	No	No	No	No	K01206 FUCA	alpha-L-fucosidase [EC:3.2.1.51]
Metabolism of cofactors and vitamins	No	No	No	No	No	No	No	No	No	No	No	No
00730 Thiamine metabolism [PATH:ko00730]	No	No	No	No	No	No	No	No	No	No	No	No
LOC_Os03g47610	Yes	No	No	No	No	No	Yes	No	No	No	No	No	K03147 thiC	thiamine biosynthesis protein ThiC
LOC_Os05g33840	No	Yes	No	No	No	No	No	Yes	No	No	No	No	K01662 dxs	1-deoxy-D-xylulose-5-phosphate synthase [EC:2.2.1.7]
LOC_Os07g09190	Yes	No	No	No	No	No	No	No	No	No	No	No	K01662 dxs	1-deoxy-D-xylulose-5-phosphate synthase [EC:2.2.1.7]
00740 Riboflavin metabolism [PATH:ko00740]	No	No	No	No	No	No	No	No	No	No	No	No
LOC_Os02g36340	No	No	No	Yes	No	No	No	No	No	No	No	No	K14652 ribBA	3,4-dihydroxy 2-butaNone 4-phosphate synthase / GTP cyclohydrolase II [EC:4.1.99.12 3.5.4.25]
00750 Vitamin B6 metabolism [PATH:ko00750]	No	No	No	No	No	No	No	No	No	No	No	No
LOC_Os05g47640	No	Yes	No	No	No	No	No	Yes	No	No	No	No	K01733 thrC	threonine synthase [EC:4.2.3.1]
LOC_Os07g01020	No	No	No	Yes	No	No	No	No	No	No	No	No	K06215 pdxS, pdx1	pyridoxine biosynthesis protein [EC:4.-.-.-]
LOC_Os10g01080	No	No	No	Yes	No	No	No	No	No	Yes	No	No	K06215 pdxS, pdx1	pyridoxine biosynthesis protein [EC:4.-.-.-]
00760 Nicotinate and nicotinamide metabolism [PATH:ko00760]	No	No	No	No	No	No	No	No	No	No	No	No
LOC_Os02g04170	No	No	No	Yes	No	No	No	No	No	Yes	No	No	K00278 nadB	L-aspartate oxidase [EC:1.4.3.16]
00770 Pantothenate and CoA biosynthesis [PATH:ko00770]	No	No	No	No	No	No	No	No	No	No	No	No
LOC_Os04g32010	No	No	No	Yes	No	No	No	No	No	No	No	No	K01652 E2.2.1.6L, ilvB, ilvG, ilvI	acetolactate synthase I/II/III large subunit [EC:2.2.1.6]
LOC_Os03g01600	No	No	Yes	No	No	No	No	No	No	No	No	No	K00826 E2.6.1.42, ilvE	branched-chain amiNo acid amiNotransferase [EC:2.6.1.42]
LOC_Os05g48450	No	Yes	No	No	No	No	No	Yes	No	No	No	No	K00826 E2.6.1.42, ilvE	branched-chain amiNo acid amiNotransferase [EC:2.6.1.42]
LOC_Os07g30170	No	No	Yes	No	No	No	No	No	Yes	No	No	No	K01431 E3.5.1.6	beta-ureidopropionase [EC:3.5.1.6]
LOC_Os02g50350	No	No	Yes	No	No	No	No	No	Yes	No	No	No	K00207 E1.3.1.2, DPYD	dihydropyrimidine dehydrogenase (NADP+) [EC:1.3.1.2]
00780 Biotin metabolism [PATH:ko00780]	No	No	No	No	No	No	No	No	No	No	No	No
LOC_Os03g53690	Yes	No	No	No	No	No	No	No	No	No	No	No	K00059 fabG	3-oxoacyl-[acyl-carrier protein] reductase [EC:1.1.1.100]
LOC_Os07g37420	No	No	No	No	No	Yes	No	Yes	No	No	No	No	K00059 fabG	3-oxoacyl-[acyl-carrier protein] reductase [EC:1.1.1.100]
00785 Lipoic acid metabolism [PATH:ko00785]	No	No	No	No	No	No	No	No	No	No	No	No
00790 Folate biosynthesis [PATH:ko00790]	No	No	No	No	No	No	No	No	No	No	No	No
LOC_Os04g56710	No	No	No	Yes	No	No	No	No	No	No	No	No	K01495 folE	GTP cyclohydrolase I [EC:3.5.4.16]
LOC_Os11g29390	No	Yes	No	No	No	No	No	No	No	No	No	No	K13998 DHFR-TS	dihydrofolate reductase / thymidylate synthase [EC:1.5.1.3 2.1.1.45]
LOC_Os10g35940	No	No	No	Yes	No	No	No	No	No	Yes	No	No	K01930 E6.3.2.17	folylpolyglutamate synthase [EC:6.3.2.17]
LOC_Os02g04740	No	Yes	No	No	No	No	No	No	No	No	No	No	K03635 MOCS2, moaE	molybdopterin synthase catalytic subunit [EC:2.-.-.-]
00670 One carbon pool by folate [PATH:ko00670]	No	No	No	No	No	No	No	No	No	No	No	No
LOC_Os11g29390	No	Yes	No	No	No	No	No	No	No	No	No	No	K13998 DHFR-TS	dihydrofolate reductase / thymidylate synthase [EC:1.5.1.3 2.1.1.45]
LOC_Os06g22560	No	Yes	No	No	No	No	No	No	No	No	No	No	K00601 E2.1.2.2	phosphoribosylglycinamide formyltransferase [EC:2.1.2.2]
LOC_Os08g39160	No	Yes	No	No	No	No	No	Yes	No	No	No	No	K00601 E2.1.2.2	phosphoribosylglycinamide formyltransferase [EC:2.1.2.2]
00830 RetiNol metabolism [PATH:ko00830]	No	No	No	No	No	No	No	No	No	No	No	No
LOC_Os03g09020	No	No	Yes	No	No	No	No	No	Yes	No	No	No	K00121 frmA, ADH5, adhC	S-(hydroxymethyl)glutathione dehydrogenase / alcohol dehydrogenase [EC:1.1.1.284 1.1.1.1]
LOC_Os10g07229	No	Yes	No	No	No	No	No	No	No	No	No	No	K00001 E1.1.1.1, adh	alcohol dehydrogenase [EC:1.1.1.1]
00860 Porphyrin and chlorophyll metabolism [PATH:ko00860]	No	No	No	No	No	No	No	No	No	No	No	No
LOC_Os12g17070	No	Yes	No	No	No	No	No	No	No	No	No	No	K02495 hemN, hemZ	oxygen-independent coproporphyriNogen III oxidase [EC:1.3.99.22]
LOC_Os05g29760	No	No	No	Yes	No	No	No	No	No	No	No	No	K01772 hemH, FECH	ferrochelatase [EC:4.99.1.1]
LOC_Os03g20700	No	Yes	No	No	No	No	No	Yes	No	No	No	No	K03403 chlH, bchH	magnesium chelatase subunit H [EC:6.6.1.1]
LOC_Os03g36540	No	Yes	No	No	No	No	No	No	No	No	No	No	K03405 chlI, bchI	magnesium chelatase subunit I [EC:6.6.1.1]
LOC_Os01g17170	No	Yes	No	No	No	No	No	No	No	No	No	No	K04035 E1.14.13.81, acsF, chlE	magnesium-protoporphyrin IX moNomethyl ester (oxidative) cyclase [EC:1.14.13.81]
LOC_Os04g58200	No	Yes	No	No	No	No	No	Yes	No	No	No	No	K00218 E1.3.1.33, por	protochlorophyllide reductase [EC:1.3.1.33]
LOC_Os10g35370	No	Yes	No	No	No	No	No	Yes	No	No	No	No	K00218 E1.3.1.33, por	protochlorophyllide reductase [EC:1.3.1.33]
LOC_Os10g28370	No	Yes	No	No	No	No	No	No	No	No	No	No	K08099 E3.1.1.14	chlorophyllase [EC:3.1.1.14]
LOC_Os10g41760	Yes	No	No	No	No	No	No	No	No	No	No	No	K13600 CAO	chlorophyllide a oxygenase [EC:1.14.13.122]
LOC_Os10g41780	No	Yes	No	No	No	No	No	No	No	No	No	No	K13600 CAO	chlorophyllide a oxygenase [EC:1.14.13.122]
LOC_Os01g12710	No	No	Yes	No	No	No	No	No	Yes	No	No	No	K13606 NoL, NYC1	chlorophyll(ide) b reductase [EC:1.1.1.294]
LOC_Os03g05310	No	Yes	No	No	No	No	No	No	No	No	No	No	K13071 PAO, ACD1	pheophorbide a oxygenase [EC:1.14.12.20]
LOC_Os10g25020	No	Yes	No	No	No	No	No	Yes	No	No	No	No	K13545 ACD2	red chlorophyll catabolite reductase [EC:1.3.1.80]
LOC_Os10g25030	No	Yes	No	No	No	No	No	Yes	No	No	No	No	K13545 ACD2	red chlorophyll catabolite reductase [EC:1.3.1.80]
LOC_Os10g25040	No	No	Yes	No	No	No	No	No	No	No	No	No	K13545 ACD2	red chlorophyll catabolite reductase [EC:1.3.1.80]
LOC_Os02g51080	No	Yes	No	No	No	No	No	Yes	No	No	No	No	K10960 chlP, bchP	geranylgeranyl reductase [EC:1.3.1.83]
LOC_Os11g01530	No	No	No	No	Yes	No	Yes	No	No	No	No	No	K00522 FTH1	ferritin heavy chain [EC:1.16.3.1]
00130 UbiquiNone and other terpeNoid-quiNone biosynthesis [PATH:ko00130]	No	No	No	No	No	No	No	No	No	No	No	No
LOC_Os02g46970	No	No	No	No	No	Yes	No	Yes	No	Yes	No	No	K01904 E6.2.1.12	4-coumarate--CoA ligase [EC:6.2.1.12]
Metabolism of terpeNoids and polyketides	No	No	No	No	No	No	No	No	No	No	No	No
01006 Prenyltransferases [BR:ko01006]	No	No	No	No	No	No	No	No	No	No	No	No
00900 TerpeNoid backbone biosynthesis [PATH:ko00900]	No	No	No	No	No	No	No	No	No	No	No	No
LOC_Os05g33840	No	Yes	No	No	No	No	No	Yes	No	No	No	No	K01662 dxs	1-deoxy-D-xylulose-5-phosphate synthase [EC:2.2.1.7]
LOC_Os07g09190	Yes	No	No	No	No	No	No	No	No	No	No	No	K01662 dxs	1-deoxy-D-xylulose-5-phosphate synthase [EC:2.2.1.7]
LOC_Os01g58790	No	Yes	No	No	No	No	No	Yes	No	No	No	No	K00919 ispE	4-diphosphocytidyl-2-C-methyl-D-erythritol kinase [EC:2.7.1.148]
LOC_Os04g56230	No	No	No	Yes	No	No	No	No	No	Yes	No	No	K00787 FDPS	farnesyl diphosphate synthase [EC:2.5.1.1 2.5.1.10]
LOC_Os01g63830	No	Yes	No	No	No	No	No	No	No	No	No	No	K11778 DHDDS, RER2, SRT1	ditrans,polycis-polyprenyl diphosphate synthase [EC:2.5.1.87]
LOC_Os02g51080	No	Yes	No	No	No	No	No	Yes	No	No	No	No	K10960 chlP, bchP	geranylgeranyl reductase [EC:1.3.1.83]
LOC_Os04g59630	No	Yes	No	No	No	No	No	No	No	No	No	No	K05906 PCYOX1, FCLY	prenylcysteine oxidase / farnesylcysteine lyase [EC:1.8.3.5 1.8.3.6]
00902 MoNoterpeNoid biosynthesis [PATH:ko00902]	No	No	No	No	No	No	No	No	No	No	No	No
LOC_Os02g02930	No	No	Yes	No	No	No	No	No	No	No	No	No	K15086 TPS14	(3S)-linalool synthase [EC:4.2.3.25]
00909 SesquiterpeNoid and triterpeNoid biosynthesis [PATH:ko00909]	No	No	No	No	No	No	No	No	No	No	No	No
LOC_Os03g12900	No	No	Yes	No	No	No	No	No	No	No	No	No	K00511 SQLE, ERG1	squalene moNooxygenase [EC:1.14.13.132]
00904 DiterpeNoid biosynthesis [PATH:ko00904]	No	No	No	No	No	No	No	No	No	No	No	No
LOC_Os03g63970	No	Yes	No	No	No	No	No	Yes	No	No	No	No	K05282 E1.14.11.12	gibberellin 20-oxidase [EC:1.14.11.12]
LOC_Os01g11150	No	No	Yes	No	No	No	No	No	No	No	No	No	K04125 E1.14.11.13	gibberellin 2-oxidase [EC:1.14.11.13]
LOC_Os05g48700	No	No	Yes	No	No	No	No	No	No	No	No	No	K04125 E1.14.11.13	gibberellin 2-oxidase [EC:1.14.11.13]
LOC_Os02g36150	No	Yes	No	No	No	No	No	No	No	No	No	No	K16083 CYP71Z6	cytochrome P450, family 71, subfamily Z, polypeptide 6 (ent-isokaurene C2-hydroxylase) [EC:1.14.13.143]
LOC_Os02g36110	No	No	Yes	No	No	No	No	No	No	No	No	No	K16084 CYP76M7	cytochrome P450, family 76, subfamily M, polypeptide 7 (ent-cassa-12,15-diene 11-hydroxylase) [EC:1.14.13.145]
LOC_Os02g36220	No	No	No	No	No	Yes	No	No	No	No	No	No	K14038 KSL5	ent-pimara-8(14),15-diene synthase [EC:4.2.3.30]
LOC_Os04g09900	No	No	Yes	No	No	No	No	No	No	No	No	No	K14043 CPS4	syn-copalyl-diphosphate synthase [EC:5.5.1.14]
LOC_Os11g28530	No	No	Yes	No	No	No	No	No	No	No	No	No	K14044 KSL8, DTC2	stemar-13-ene synthase [EC:4.2.3.33]
LOC_Os04g10010	No	No	Yes	No	No	No	No	No	No	No	No	No	K13070 MAS	momilactone-A synthase [EC:1.1.1.295]
00906 CaroteNoid biosynthesis [PATH:ko00906]	No	No	No	No	No	No	No	No	No	No	No	No
LOC_Os12g43130	No	No	No	Yes	No	No	No	No	No	Yes	No	No	K02291 crtB	phytoene synthase [EC:2.5.1.32]
LOC_Os02g09750	No	Yes	No	No	No	No	No	Yes	No	No	No	No	K06443 lcyB, crtL1, crtY	lycopene beta-cyclase [EC:5.5.1.19]
LOC_Os01g39960	No	Yes	No	No	No	No	No	Yes	No	No	No	No	K06444 lcyE, crtL2	lycopene epsilon-cyclase [EC:5.5.1.18]
LOC_Os04g48880	No	No	No	No	No	Yes	No	No	No	No	No	No	K15746 crtZ	beta-carotene 3-hydroxylase [EC:1.14.13.129]
LOC_Os10g38940	No	No	No	No	No	Yes	No	Yes	No	Yes	No	No	K15746 crtZ	beta-carotene 3-hydroxylase [EC:1.14.13.129]
LOC_Os04g31040	No	No	No	Yes	No	No	No	No	No	No	No	No	K09839 VDE, NPQ1	violaxanthin de-epoxidase [EC:1.10.99.3]
LOC_Os02g47510	No	Yes	No	No	No	No	No	Yes	No	No	No	No	K09840 NCED	9-cis-epoxycaroteNoid dioxygenase [EC:1.13.11.51]
LOC_Os03g44380	No	Yes	No	No	No	No	No	No	No	No	No	No	K09840 NCED	9-cis-epoxycaroteNoid dioxygenase [EC:1.13.11.51]
LOC_Os07g05940	No	No	No	No	Yes	No	No	No	Yes	No	No	No	K09840 NCED	9-cis-epoxycaroteNoid dioxygenase [EC:1.13.11.51]
LOC_Os08g36860	No	No	Yes	No	No	No	No	No	No	No	No	No	K09843 E1.14.13.93	(+)-abscisic acid 8'-hydroxylase [EC:1.14.13.93]
LOC_Os09g28390	Yes	No	No	No	No	No	No	No	No	No	No	No	K09843 E1.14.13.93	(+)-abscisic acid 8'-hydroxylase [EC:1.14.13.93]
00905 BrassiNosteroid biosynthesis [PATH:ko00905]	No	No	No	No	No	No	No	No	No	No	No	No
LOC_Os04g39430	No	Yes	No	No	No	No	No	Yes	No	No	No	No	K12639 CYP724B1, D11	cytochrome P450, family 724, subfamily B, polypeptide 1 [EC:1.14.13.-]
LOC_Os01g10040	No	Yes	No	No	No	No	No	Yes	No	No	No	No	K09589 CYP90D2, D2	cytochrome P450, family 90, subfamily D, polypeptide 2 (steroid 3-oxidase) [EC:1.14.-.-]
LOC_Os01g29150	No	Yes	No	No	No	No	No	Yes	No	No	No	No	K15639 CYP734A1, BAS1	cytochrome P450, family 734, subfamily A, polypeptide 1 (PHYB activation tagged suppressor 1) [EC:1.14.-.-]
LOC_Os02g11020	No	No	Yes	No	No	No	No	No	No	No	No	No	K15639 CYP734A1, BAS1	cytochrome P450, family 734, subfamily A, polypeptide 1 (PHYB activation tagged suppressor 1) [EC:1.14.-.-]
00981 Insect hormone biosynthesis [PATH:ko00981]	No	No	No	No	No	No	No	No	No	No	No	No
00908 Zeatin biosynthesis [PATH:ko00908]	No	No	No	No	No	No	No	No	No	No	No	No
LOC_Os03g59570	No	Yes	No	No	No	No	No	No	No	No	No	No	K10760 IPT	adenylate isopentenyltransferase (cytokinin synthase)
LOC_Os05g31040	No	Yes	No	No	No	No	No	Yes	No	No	No	No	K00279 E1.5.99.12	cytokinin dehydrogenase [EC:1.5.99.12]
LOC_Os06g51350	No	Yes	No	No	No	No	No	Yes	No	No	No	No	K00791 miaA, TRIT1	tRNA dimethylallyltransferase [EC:2.5.1.75]
LOC_Os04g46980	No	No	No	Yes	No	No	No	No	No	No	No	No	K13495 CISZOG	cis-zeatin O-glucosyltransferase [EC:2.4.1.215]
LOC_Os04g46990	No	No	No	Yes	No	No	No	No	No	Yes	No	No	K13495 CISZOG	cis-zeatin O-glucosyltransferase [EC:2.4.1.215]
LOC_Os04g47720	Yes	No	No	No	No	No	No	No	No	No	No	No	K13495 CISZOG	cis-zeatin O-glucosyltransferase [EC:2.4.1.215]
00903 Limonene and pinene degradation [PATH:ko00903]	No	No	No	No	No	No	No	No	No	No	No	No
LOC_Os02g43194	No	No	No	No	No	Yes	No	Yes	No	Yes	No	No	K00128 E1.2.1.3	aldehyde dehydrogenase (NAD+) [EC:1.2.1.3]
LOC_Os02g43280	No	Yes	No	No	No	No	No	Yes	No	No	No	No	K00128 E1.2.1.3	aldehyde dehydrogenase (NAD+) [EC:1.2.1.3]
LOC_Os03g30420	No	No	No	No	No	Yes	No	No	No	No	No	No	K00517 E1.14.-.-	[EC:1.14.-.-]
LOC_Os04g33370	No	No	No	Yes	No	No	No	No	No	No	No	No	K00517 E1.14.-.-	[EC:1.14.-.-]
LOC_Os10g37110	No	Yes	No	No	No	No	No	No	No	No	No	No	K00517 E1.14.-.-	[EC:1.14.-.-]
00281 Geraniol degradation [PATH:ko00281]	No	No	No	No	No	No	No	No	No	No	No	No
LOC_Os01g16350	No	No	Yes	No	No	No	No	No	Yes	No	No	No	K01640 E4.1.3.4, HMGCL, hmgL	hydroxymethylglutaryl-CoA lyase [EC:4.1.3.4]
01008 Polyketide biosynthesis proteins [BR:ko01008]	No	No	No	No	No	No	No	No	No	No	No	No
01052 Type I polyketide structures [PATH:ko01052]	No	No	No	No	No	No	No	No	No	No	No	No
00522 Biosynthesis of 12-, 14- and 16-membered macrolides [PATH:ko00522]	No	No	No	No	No	No	No	No	No	No	No	No
01051 Biosynthesis of ansamycins [PATH:ko01051]	No	No	No	No	No	No	No	No	No	No	No	No
01056 Biosynthesis of type II polyketide backbone [PATH:ko01056]	No	No	No	No	No	No	No	No	No	No	No	No
01057 Biosynthesis of type II polyketide products [PATH:ko01057]	No	No	No	No	No	No	No	No	No	No	No	No
00253 Tetracycline biosynthesis [PATH:ko00253]	No	No	No	No	No	No	No	No	No	No	No	No
00523 Polyketide sugar unit biosynthesis [PATH:ko00523]	No	No	No	No	No	No	No	No	No	No	No	No
01054 Nonribosomal peptide structures [PATH:ko01054]	No	No	No	No	No	No	No	No	No	No	No	No
01053 Biosynthesis of siderophore group Nonribosomal peptides [PATH:ko01053]	No	No	No	No	No	No	No	No	No	No	No	No
01055 Biosynthesis of vancomycin group antibiotics [PATH:ko01055]	No	No	No	No	No	No	No	No	No	No	No	No
Biosynthesis of other secondary metabolites	No	No	No	No	No	No	No	No	No	No	No	No
00940 PhenylpropaNoid biosynthesis [PATH:ko00940]	No	No	No	No	No	No	No	No	No	No	No	No
LOC_Os05g35290	No	No	No	Yes	No	No	No	No	No	No	No	No	K10775 E4.3.1.24	phenylalanine ammonia-lyase [EC:4.3.1.24]
LOC_Os04g43760	No	No	No	Yes	No	No	No	No	No	Yes	No	No	K13064 PTAL	phenylalanine/tyrosine ammonia-lyase [EC:4.3.1.25]
LOC_Os04g39900	No	Yes	No	No	No	No	No	Yes	No	No	No	No	K01188 E3.2.1.21	beta-glucosidase [EC:3.2.1.21]
LOC_Os05g30350	No	Yes	No	No	No	No	No	Yes	No	No	No	No	K01188 E3.2.1.21	beta-glucosidase [EC:3.2.1.21]
LOC_Os10g17650	No	No	Yes	No	No	No	No	No	Yes	No	No	No	K01188 E3.2.1.21	beta-glucosidase [EC:3.2.1.21]
LOC_Os03g53790	Yes	No	No	No	No	No	No	No	No	No	No	No	K05349 bglX	beta-glucosidase [EC:3.2.1.21]
LOC_Os03g53800	No	No	Yes	No	No	No	No	No	No	No	No	No	K05349 bglX	beta-glucosidase [EC:3.2.1.21]
LOC_Os02g46970	No	No	No	No	No	Yes	No	Yes	No	Yes	No	No	K01904 E6.2.1.12	4-coumarate--CoA ligase [EC:6.2.1.12]
LOC_Os08g34280	No	No	No	No	No	Yes	No	Yes	No	Yes	No	No	K09753 CCR	cinnamoyl-CoA reductase [EC:1.2.1.44]
LOC_Os10g29470	No	No	No	Yes	No	No	No	No	No	No	No	No	K00083 E1.1.1.195	cinnamyl-alcohol dehydrogenase [EC:1.1.1.195]
LOC_Os07g44430	No	No	Yes	No	No	No	No	No	No	No	No	No	K11188 PRDX6	peroxiredoxin 6, 1-Cys peroxiredoxin [EC:1.11.1.7 1.11.1.15 3.1.1.-]
LOC_Os07g44440	No	No	Yes	No	No	No	No	No	No	No	No	No	K11188 PRDX6	peroxiredoxin 6, 1-Cys peroxiredoxin [EC:1.11.1.7 1.11.1.15 3.1.1.-]
LOC_Os01g15830	Yes	No	No	No	No	No	No	No	No	No	No	No	K00430 E1.11.1.7	peroxidase [EC:1.11.1.7]
LOC_Os03g55420	No	No	Yes	No	No	No	No	No	Yes	No	No	No	K00430 E1.11.1.7	peroxidase [EC:1.11.1.7]
LOC_Os04g53640	Yes	No	No	No	No	No	Yes	No	No	No	No	No	K00430 E1.11.1.7	peroxidase [EC:1.11.1.7]
LOC_Os07g02440	No	No	No	Yes	No	No	No	No	No	Yes	No	No	K00430 E1.11.1.7	peroxidase [EC:1.11.1.7]
LOC_Os07g47990	No	Yes	No	No	No	No	No	Yes	No	No	No	No	K00430 E1.11.1.7	peroxidase [EC:1.11.1.7]
LOC_Os07g49360	No	Yes	No	No	No	No	No	Yes	No	No	No	No	K00430 E1.11.1.7	peroxidase [EC:1.11.1.7]
LOC_Os08g02110	No	No	No	No	No	Yes	No	Yes	No	No	No	No	K00430 E1.11.1.7	peroxidase [EC:1.11.1.7]
LOC_Os09g29490	No	No	No	Yes	No	No	No	No	No	No	No	No	K00430 E1.11.1.7	peroxidase [EC:1.11.1.7]
LOC_Os03g02180	Yes	No	No	No	No	No	No	No	No	No	No	No	K09755 CYP84A, F5H	ferulate-5-hydroxylase [EC:1.14.-.-]
00945 StilbeNoid, diarylheptaNoid and gingerol biosynthesis [PATH:ko00945]	No	No	No	No	No	No	No	No	No	No	No	No
LOC_Os03g30420	No	No	No	No	No	Yes	No	No	No	No	No	No	K00517 E1.14.-.-	[EC:1.14.-.-]
LOC_Os04g33370	No	No	No	Yes	No	No	No	No	No	No	No	No	K00517 E1.14.-.-	[EC:1.14.-.-]
LOC_Os10g37110	No	Yes	No	No	No	No	No	No	No	No	No	No	K00517 E1.14.-.-	[EC:1.14.-.-]
00941 FlavoNoid biosynthesis [PATH:ko00941]	No	No	No	No	No	No	No	No	No	No	No	No
LOC_Os11g32650	No	No	No	No	No	Yes	No	Yes	No	Yes	No	No	K00660 CHS	chalcone synthase [EC:2.3.1.74]
LOC_Os03g60509	No	Yes	No	No	No	No	No	Yes	No	No	No	No	K01859 E5.5.1.6	chalcone isomerase [EC:5.5.1.6]
LOC_Os03g25150	No	Yes	No	No	No	No	No	Yes	No	No	No	No	K05280 E1.14.13.21	flavoNoid 3'-moNooxygenase [EC:1.14.13.21]
LOC_Os10g17260	No	No	No	No	No	Yes	No	Yes	No	Yes	No	No	K05280 E1.14.13.21	flavoNoid 3'-moNooxygenase [EC:1.14.13.21]
00944 Flavone and flavoNol biosynthesis [PATH:ko00944]	No	No	No	No	No	No	No	No	No	No	No	No
LOC_Os03g25150	No	Yes	No	No	No	No	No	Yes	No	No	No	No	K05280 E1.14.13.21	flavoNoid 3'-moNooxygenase [EC:1.14.13.21]
LOC_Os10g17260	No	No	No	No	No	Yes	No	Yes	No	Yes	No	No	K05280 E1.14.13.21	flavoNoid 3'-moNooxygenase [EC:1.14.13.21]
LOC_Os08g06100	No	Yes	No	No	No	No	No	Yes	No	No	No	No	K05279 E2.1.1.76	flavoNol 3-O-methyltransferase [EC:2.1.1.76]
00942 Anthocyanin biosynthesis [PATH:ko00942]	No	No	No	No	No	No	No	No	No	No	No	No
00943 IsoflavoNoid biosynthesis [PATH:ko00943]	No	No	No	No	No	No	No	No	No	No	No	No
00901 Indole alkaloid biosynthesis [PATH:ko00901]	No	No	No	No	No	No	No	No	No	No	No	No
00950 IsoquiNoline alkaloid biosynthesis [PATH:ko00950]	No	No	No	No	No	No	No	No	No	No	No	No
LOC_Os01g56380	No	Yes	No	No	No	No	No	Yes	No	No	No	No	K01592 E4.1.1.25	tyrosine decarboxylase [EC:4.1.1.25]
LOC_Os08g04560	No	Yes	No	No	No	No	No	Yes	No	No	No	No	K01592 E4.1.1.25	tyrosine decarboxylase [EC:4.1.1.25]
00960 Tropane, piperidine and pyridine alkaloid biosynthesis [PATH:ko00960]	No	No	No	No	No	No	No	No	No	No	No	No
LOC_Os03g16230	No	Yes	No	No	No	No	No	No	No	No	No	No	K08081 E1.1.1.206	tropine dehydrogenase [EC:1.1.1.206]
01058 Acridone alkaloid biosynthesis [PATH:ko01058]	No	No	No	No	No	No	No	No	No	No	No	No
00232 Caffeine metabolism [PATH:ko00232]	No	No	No	No	No	No	No	No	No	No	No	No
LOC_Os01g64520	No	No	Yes	No	No	No	No	No	No	No	No	No	K00365 E1.7.3.3	urate oxidase [EC:1.7.3.3]
00965 Betalain biosynthesis [PATH:ko00965]	No	No	No	No	No	No	No	No	No	No	No	No
00966 GlucosiNolate biosynthesis [PATH:ko00966]	No	No	No	No	No	No	No	No	No	No	No	No
00402 BenzoxaziNoid biosynthesis [PATH:ko00402]	No	No	No	No	No	No	No	No	No	No	No	No
LOC_Os03g58290	No	No	No	Yes	No	No	No	No	No	Yes	No	No	K13222 BX1, IGL	indole-3-glycerol-phosphate lyase [EC:4.1.2.8]
00311 Penicillin and cephalosporin biosynthesis [PATH:ko00311]	No	No	No	No	No	No	No	No	No	No	No	No
00312 beta-Lactam resistance [PATH:ko00312]	No	No	No	No	No	No	No	No	No	No	No	No
00521 Streptomycin biosynthesis [PATH:ko00521]	No	No	No	No	No	No	No	No	No	No	No	No
LOC_Os05g09500	No	No	Yes	No	No	No	No	No	No	No	No	No	K00844 HK	hexokinase [EC:2.7.1.1]
00524 Butirosin and neomycin biosynthesis [PATH:ko00524]	No	No	No	No	No	No	No	No	No	No	No	No
LOC_Os05g09500	No	No	Yes	No	No	No	No	No	No	No	No	No	K00844 HK	hexokinase [EC:2.7.1.1]
00331 Clavulanic acid biosynthesis [PATH:ko00331]	No	No	No	No	No	No	No	No	No	No	No	No
00231 Puromycin biosynthesis [PATH:ko00231]	No	No	No	No	No	No	No	No	No	No	No	No
00401 Novobiocin biosynthesis [PATH:ko00401]	No	No	No	No	No	No	No	No	No	No	No	No
XeNobiotics biodegradation and metabolism	No	No	No	No	No	No	No	No	No	No	No	No
00362 Benzoate degradation [PATH:ko00362]	No	No	No	No	No	No	No	No	No	No	No	No
LOC_Os02g57260	No	No	Yes	No	No	No	No	No	No	No	No	No	K07513 ACAA1	acetyl-CoA acyltransferase 1 [EC:2.3.1.16]
00627 AmiNobenzoate degradation [PATH:ko00627]	No	No	No	No	No	No	No	No	No	No	No	No
LOC_Os06g15380	No	Yes	No	No	No	No	No	No	No	No	No	No	K01512 acyP	acylphosphatase [EC:3.6.1.7]
LOC_Os06g15390	No	Yes	No	No	No	No	No	Yes	No	No	No	No	K01512 acyP	acylphosphatase [EC:3.6.1.7]
LOC_Os03g30420	No	No	No	No	No	Yes	No	No	No	No	No	No	K00517 E1.14.-.-	[EC:1.14.-.-]
LOC_Os04g33370	No	No	No	Yes	No	No	No	No	No	No	No	No	K00517 E1.14.-.-	[EC:1.14.-.-]
LOC_Os10g37110	No	Yes	No	No	No	No	No	No	No	No	No	No	K00517 E1.14.-.-	[EC:1.14.-.-]
00364 Fluorobenzoate degradation [PATH:ko00364]	No	No	No	No	No	No	No	No	No	No	No	No
00625 Chloroalkane and chloroalkene degradation [PATH:ko00625]	No	No	No	No	No	No	No	No	No	No	No	No
LOC_Os10g07229	No	Yes	No	No	No	No	No	No	No	No	No	No	K00001 E1.1.1.1, adh	alcohol dehydrogenase [EC:1.1.1.1]
LOC_Os03g09020	No	No	Yes	No	No	No	No	No	Yes	No	No	No	K00121 frmA, ADH5, adhC	S-(hydroxymethyl)glutathione dehydrogenase / alcohol dehydrogenase [EC:1.1.1.284 1.1.1.1]
LOC_Os02g43194	No	No	No	No	No	Yes	No	Yes	No	Yes	No	No	K00128 E1.2.1.3	aldehyde dehydrogenase (NAD+) [EC:1.2.1.3]
LOC_Os02g43280	No	Yes	No	No	No	No	No	Yes	No	No	No	No	K00128 E1.2.1.3	aldehyde dehydrogenase (NAD+) [EC:1.2.1.3]
00361 Chlorocyclohexane and chlorobenzene degradation [PATH:ko00361]	No	No	No	No	No	No	No	No	No	No	No	No
00623 Toluene degradation [PATH:ko00623]	No	No	No	No	No	No	No	No	No	No	No	No
00622 Xylene degradation [PATH:ko00622]	No	No	No	No	No	No	No	No	No	No	No	No
00633 Nitrotoluene degradation [PATH:ko00633]	No	No	No	No	No	No	No	No	No	No	No	No
00642 Ethylbenzene degradation [PATH:ko00642]	No	No	No	No	No	No	No	No	No	No	No	No
00643 Styrene degradation [PATH:ko00643]	No	No	No	No	No	No	No	No	No	No	No	No
LOC_Os02g10310	No	No	Yes	No	No	No	No	No	Yes	No	No	No	K01555 FAH, fahA	fumarylacetoacetase [EC:3.7.1.2]
00791 Atrazine degradation [PATH:ko00791]	No	No	No	No	No	No	No	No	No	No	No	No
00930 Caprolactam degradation [PATH:ko00930]	No	No	No	No	No	No	No	No	No	No	No	No
LOC_Os05g38230	No	No	No	Yes	No	No	No	No	No	No	No	No	K00002 E1.1.1.2, adh	alcohol dehydrogenase (NADP+) [EC:1.1.1.2]
00351 1,1,1-Trichloro-2,2-bis(4-chlorophenyl)ethane (DDT) degradation [PATH:ko00351]	No	No	No	No	No	No	No	No	No	No	No	No
00363 BispheNol degradation [PATH:ko00363]	No	No	No	No	No	No	No	No	No	No	No	No
LOC_Os03g30420	No	No	No	No	No	Yes	No	No	No	No	No	No	K00517 E1.14.-.-	[EC:1.14.-.-]
LOC_Os04g33370	No	No	No	Yes	No	No	No	No	No	No	No	No	K00517 E1.14.-.-	[EC:1.14.-.-]
LOC_Os10g37110	No	Yes	No	No	No	No	No	No	No	No	No	No	K00517 E1.14.-.-	[EC:1.14.-.-]
00621 Dioxin degradation [PATH:ko00621]	No	No	No	No	No	No	No	No	No	No	No	No
00626 Naphthalene degradation [PATH:ko00626]	No	No	No	No	No	No	No	No	No	No	No	No
LOC_Os10g07229	No	Yes	No	No	No	No	No	No	No	No	No	No	K00001 E1.1.1.1, adh	alcohol dehydrogenase [EC:1.1.1.1]
LOC_Os03g09020	No	No	Yes	No	No	No	No	No	Yes	No	No	No	K00121 frmA, ADH5, adhC	S-(hydroxymethyl)glutathione dehydrogenase / alcohol dehydrogenase [EC:1.1.1.284 1.1.1.1]
00624 Polycyclic aromatic hydrocarbon degradation [PATH:ko00624]	No	No	No	No	No	No	No	No	No	No	No	No
LOC_Os03g30420	No	No	No	No	No	Yes	No	No	No	No	No	No	K00517 E1.14.-.-	[EC:1.14.-.-]
LOC_Os04g33370	No	No	No	Yes	No	No	No	No	No	No	No	No	K00517 E1.14.-.-	[EC:1.14.-.-]
LOC_Os10g37110	No	Yes	No	No	No	No	No	No	No	No	No	No	K00517 E1.14.-.-	[EC:1.14.-.-]
00365 Furfural degradation [PATH:ko00365]	No	No	No	No	No	No	No	No	No	No	No	No
00984 Steroid degradation [PATH:ko00984]	No	No	No	No	No	No	No	No	No	No	No	No
00980 Metabolism of xeNobiotics by cytochrome P450 [PATH:ko00980]	No	No	No	No	No	No	No	No	No	No	No	No
LOC_Os01g27340	Yes	No	No	No	No	No	No	No	No	No	No	No	K00799 GST, gst	glutathione S-transferase [EC:2.5.1.18]
LOC_Os01g72120	No	No	Yes	No	No	No	No	No	No	No	No	No	K00799 GST, gst	glutathione S-transferase [EC:2.5.1.18]
LOC_Os01g72130	No	No	Yes	No	No	No	No	No	No	No	No	No	K00799 GST, gst	glutathione S-transferase [EC:2.5.1.18]
LOC_Os03g04260	No	Yes	No	No	No	No	No	No	No	No	No	No	K00799 GST, gst	glutathione S-transferase [EC:2.5.1.18]
LOC_Os03g50130	No	Yes	No	No	No	No	No	No	No	No	No	No	K00799 GST, gst	glutathione S-transferase [EC:2.5.1.18]
LOC_Os10g38580	No	No	No	No	No	Yes	No	Yes	No	Yes	Yes	No	K00799 GST, gst	glutathione S-transferase [EC:2.5.1.18]
LOC_Os10g38590	No	No	Yes	No	No	No	No	No	No	No	No	No	K00799 GST, gst	glutathione S-transferase [EC:2.5.1.18]
LOC_Os10g38700	No	Yes	No	No	No	No	No	Yes	No	No	No	No	K00799 GST, gst	glutathione S-transferase [EC:2.5.1.18]
LOC_Os10g38710	No	No	No	No	No	Yes	No	Yes	No	Yes	No	No	K00799 GST, gst	glutathione S-transferase [EC:2.5.1.18]
LOC_Os03g09020	No	No	Yes	No	No	No	No	No	Yes	No	No	No	K00121 frmA, ADH5, adhC	S-(hydroxymethyl)glutathione dehydrogenase / alcohol dehydrogenase [EC:1.1.1.284 1.1.1.1]
LOC_Os10g07229	No	Yes	No	No	No	No	No	No	No	No	No	No	K00001 E1.1.1.1, adh	alcohol dehydrogenase [EC:1.1.1.1]
00982 Drug metabolism - cytochrome P450 [PATH:ko00982]	No	No	No	No	No	No	No	No	No	No	No	No
LOC_Os01g27340	Yes	No	No	No	No	No	No	No	No	No	No	No	K00799 GST, gst	glutathione S-transferase [EC:2.5.1.18]
LOC_Os01g72120	No	No	Yes	No	No	No	No	No	No	No	No	No	K00799 GST, gst	glutathione S-transferase [EC:2.5.1.18]
LOC_Os01g72130	No	No	Yes	No	No	No	No	No	No	No	No	No	K00799 GST, gst	glutathione S-transferase [EC:2.5.1.18]
LOC_Os03g04260	No	Yes	No	No	No	No	No	No	No	No	No	No	K00799 GST, gst	glutathione S-transferase [EC:2.5.1.18]
LOC_Os03g50130	No	Yes	No	No	No	No	No	No	No	No	No	No	K00799 GST, gst	glutathione S-transferase [EC:2.5.1.18]
LOC_Os10g38580	No	No	No	No	No	Yes	No	Yes	No	Yes	Yes	No	K00799 GST, gst	glutathione S-transferase [EC:2.5.1.18]
LOC_Os10g38590	No	No	Yes	No	No	No	No	No	No	No	No	No	K00799 GST, gst	glutathione S-transferase [EC:2.5.1.18]
LOC_Os10g38700	No	Yes	No	No	No	No	No	Yes	No	No	No	No	K00799 GST, gst	glutathione S-transferase [EC:2.5.1.18]
LOC_Os10g38710	No	No	No	No	No	Yes	No	Yes	No	Yes	No	No	K00799 GST, gst	glutathione S-transferase [EC:2.5.1.18]
LOC_Os03g09020	No	No	Yes	No	No	No	No	No	Yes	No	No	No	K00121 frmA, ADH5, adhC	S-(hydroxymethyl)glutathione dehydrogenase / alcohol dehydrogenase [EC:1.1.1.284 1.1.1.1]
LOC_Os10g07229	No	Yes	No	No	No	No	No	No	No	No	No	No	K00001 E1.1.1.1, adh	alcohol dehydrogenase [EC:1.1.1.1]
00983 Drug metabolism - other enzymes [PATH:ko00983]	No	No	No	No	No	No	No	No	No	No	No	No
LOC_Os01g51540	No	No	Yes	No	No	No	No	No	No	No	No	No	K01489 E3.5.4.5, cdd	cytidine deaminase [EC:3.5.4.5]
LOC_Os02g50350	No	No	Yes	No	No	No	No	No	Yes	No	No	No	K00207 E1.3.1.2, DPYD	dihydropyrimidine dehydrogenase (NADP+) [EC:1.3.1.2]
LOC_Os07g30170	No	No	Yes	No	No	No	No	No	Yes	No	No	No	K01431 E3.5.1.6	beta-ureidopropionase [EC:3.5.1.6]
Enzyme families	No	No	No	No	No	No	No	No	No	No	No	No
01000 Enzymes [BR:ko01000]	No	No	No	No	No	No	No	No	No	No	No	No
01001 Protein kinases [BR:ko01001]	No	No	No	No	No	No	No	No	No	No	No	No
01002 Peptidases [BR:ko01002]	No	No	No	No	No	No	No	No	No	No	No	No
00199 Cytochrome P450 [BR:ko00199]	No	No	No	No	No	No	No	No	No	No	No	No
Genetic Information Processing	No	No	No	No	No	No	No	No	No	No	No	No
Transcription	No	No	No	No	No	No	No	No	No	No	No	No
03020 RNA polymerase [PATH:ko03020]	No	No	No	No	No	No	No	No	No	No	No	No
LOC_Os08g20090	No	Yes	No	No	No	No	No	No	No	No	No	No	K03043 rpoB	DNA-directed RNA polymerase subunit beta [EC:2.7.7.6]
LOC_Os12g23570	Yes	No	No	No	No	No	No	No	No	No	No	No	K03043 rpoB	DNA-directed RNA polymerase subunit beta [EC:2.7.7.6]
LOC_Os05g05860	Yes	No	No	No	No	No	Yes	No	No	No	No	No	K03006 RPB1, POLR2A	DNA-directed RNA polymerase II subunit RPB1 [EC:2.7.7.6]
LOC_Os11g45080	Yes	No	No	No	No	No	No	No	No	No	No	No	K03017 RPB9, POLR2I	DNA-directed RNA polymerase II subunit RPB9
LOC_Os12g37370	No	Yes	No	No	No	No	No	Yes	No	No	No	No	K03017 RPB9, POLR2I	DNA-directed RNA polymerase II subunit RPB9
LOC_Os01g34614	No	Yes	No	No	No	No	No	Yes	No	No	No	No	K03009 RPB12, POLR2K	DNA-directed RNA polymerases I, II, and III subunit RPABC4
03022 Basal transcription factors [PATH:ko03022]	No	No	No	No	No	No	No	No	No	No	No	No
LOC_Os01g73890	Yes	No	No	No	No	No	Yes	No	No	No	No	No	K03123 TFIIA2, GTF2A2, TOA2	transcription initiation factor TFIIA small subunit
LOC_Os03g10070	No	Yes	No	No	No	No	No	No	No	No	No	No	K03124 TFIIB, GTF2B, SUA7, tfb	transcription initiation factor TFIIB
LOC_Os12g38620	Yes	No	No	No	No	No	Yes	No	No	No	No	No	K14649 TAF8	transcription initiation factor TFIID subunit 8
LOC_Os03g07930	Yes	No	No	No	No	No	Yes	No	No	No	No	No	K03137 TFIIE2, GTF2E2, TFA2	transcription initiation factor TFIIE subunit beta
LOC_Os07g38600	No	Yes	No	No	No	No	No	Yes	No	No	No	No	K10845 TTDA, GTF2H5, TFB5	TFIIH basal transcription factor complex TTD-A subunit
03000 Transcription factors [BR:ko03000]	No	No	No	No	No	No	No	No	No	No	No	No
03021 Transcription machinery [BR:ko03021]	No	No	No	No	No	No	No	No	No	No	No	No
03040 Spliceosome [PATH:ko03040]	No	No	No	No	No	No	No	No	No	No	No	No
LOC_Os08g06344	Yes	No	No	Yes	No	No	Yes	No	No	No	Yes	Yes	K12811 DDX46, PRP5	ATP-dependent RNA helicase DDX46/PRP5 [EC:3.6.4.13]
LOC_Os05g32370	Yes	No	No	No	No	No	Yes	No	No	No	No	No	K12813 DHX16	pre-mRNA-splicing factor ATP-dependent RNA helicase DHX16 [EC:3.6.4.13]
LOC_Os03g49430	No	Yes	No	No	No	No	No	Yes	No	No	No	No	K12817 PRPF18, PRP18	pre-mRNA-splicing factor 18
LOC_Os06g23530	Yes	No	No	No	No	No	Yes	No	No	No	No	No	K12818 DHX8, PRP22	ATP-dependent RNA helicase DHX8/PRP22 [EC:3.6.4.13]
LOC_Os02g27790	Yes	No	No	No	No	No	No	No	No	No	No	No	K12828 SF3B1, SAP155	splicing factor 3B subunit 1
LOC_Os05g35274	Yes	No	No	No	No	No	Yes	No	No	No	No	No	K12831 SF3B4, SAP49	splicing factor 3B subunit 4
LOC_Os11g30290	Yes	No	No	No	No	No	Yes	No	No	No	No	No	K12834 PHF5A	PHD finger-like domain-containing protein 5A
LOC_Os02g01880	Yes	No	No	No	No	No	No	No	No	No	No	No	K12854 SNRNP200, BRR2	pre-mRNA-splicing helicase BRR2 [EC:3.6.4.13]
LOC_Os01g15860	Yes	No	No	No	No	No	Yes	No	No	No	No	No	K12855 PRPF6, PRP6	pre-mRNA-processing factor 6
LOC_Os10g35550	Yes	No	No	No	No	No	Yes	No	No	No	No	No	K12855 PRPF6, PRP6	pre-mRNA-processing factor 6
LOC_Os01g62290	No	Yes	No	No	No	No	No	Yes	No	No	No	No	K03283 HSPA1_8	heat shock 70kDa protein 1/8
LOC_Os03g16860	No	Yes	No	No	No	No	No	No	No	No	No	No	K03283 HSPA1_8	heat shock 70kDa protein 1/8
LOC_Os03g16880	Yes	No	No	No	No	No	Yes	No	No	No	No	No	K03283 HSPA1_8	heat shock 70kDa protein 1/8
LOC_Os03g16920	No	No	Yes	No	No	No	No	No	No	No	No	No	K03283 HSPA1_8	heat shock 70kDa protein 1/8
LOC_Os05g38530	No	Yes	No	No	No	No	No	Yes	No	No	No	No	K03283 HSPA1_8	heat shock 70kDa protein 1/8
LOC_Os03g17010	Yes	No	No	No	No	No	Yes	No	No	No	No	No	K12881 THOC4, ALY	THO complex subunit 4
LOC_Os08g23120	No	Yes	No	No	No	No	No	No	No	No	No	No	K12741 HNRNPA1_3	heterogeneous nuclear ribonucleoprotein A1/A3
LOC_Os07g08950	No	No	Yes	No	No	No	No	No	No	No	No	No	K12885 RBMX, HNRNPG	heterogeneous nuclear ribonucleoprotein G
LOC_Os02g03040	Yes	No	No	No	No	No	Yes	No	No	No	No	No	K12893 SFRS4_5_6	splicing factor, arginine/serine-rich 4/5/6
LOC_Os06g08840	No	No	Yes	No	No	No	No	No	No	No	No	No	K12896 SFRS7	splicing factor, arginine/serine-rich 7
LOC_Os07g43950	No	Yes	No	No	No	No	No	Yes	No	No	No	No	K12900 FUSIP1	FUS-interacting serine-arginine-rich protein 1
03041 Spliceosome [BR:ko03041]	No	No	No	No	No	No	No	No	No	No	No	No
Translation	No	No	No	No	No	No	No	No	No	No	No	No
03010 Ribosome [PATH:ko03010]	No	No	No	No	No	No	No	No	No	No	No	No
LOC_Os09g19952	No	No	No	Yes	No	No	No	No	No	No	No	No	K02982 RP-S3, rpsC	small subunit ribosomal protein S3
LOC_Os04g16728	Yes	No	No	No	No	No	No	No	No	No	No	No	K02956 RP-S15, rpsO	small subunit ribosomal protein S15
LOC_Os11g29190	No	Yes	No	No	No	No	No	Yes	No	No	No	No	K02989 RP-S5e, RPS5	small subunit ribosomal protein S5e
LOC_Os03g22460	No	Yes	No	No	No	No	No	Yes	No	No	No	No	K02971 RP-S21e, RPS21	small subunit ribosomal protein S21e
LOC_Os01g61814	No	Yes	No	No	No	No	No	Yes	No	No	No	No	K02973 RP-S23e, RPS23	small subunit ribosomal protein S23e
LOC_Os03g60400	No	Yes	No	No	No	No	No	Yes	No	No	No	No	K02973 RP-S23e, RPS23	small subunit ribosomal protein S23e
LOC_Os01g52490	No	Yes	No	No	No	No	No	Yes	No	No	No	No	K02974 RP-S24e, RPS24	small subunit ribosomal protein S24e
LOC_Os03g15870	No	Yes	No	No	No	No	No	Yes	No	No	No	No	K02926 RP-L4, rplD	large subunit ribosomal protein L4
LOC_Os01g47330	No	Yes	No	No	No	No	No	Yes	No	No	No	No	K02935 RP-L7, rplL	large subunit ribosomal protein L7/L12
LOC_Os05g49320	No	Yes	No	No	No	No	No	Yes	No	No	No	No	K02935 RP-L7, rplL	large subunit ribosomal protein L7/L12
LOC_Os03g17580	No	Yes	No	No	No	No	No	No	No	No	No	No	K02864 RP-L10, rplJ	large subunit ribosomal protein L10
LOC_Os05g03030	No	Yes	No	No	No	No	No	No	No	No	No	No	K02864 RP-L10, rplJ	large subunit ribosomal protein L10
LOC_Os03g03020	No	Yes	No	No	No	No	No	Yes	No	No	No	No	K02867 RP-L11, rplK	large subunit ribosomal protein L11
LOC_Os10g32870	No	Yes	No	No	No	No	No	Yes	No	No	No	No	K02867 RP-L11, rplK	large subunit ribosomal protein L11
LOC_Os05g15360	No	No	No	Yes	No	No	No	No	No	No	No	No	K02871 RP-L13, rplM	large subunit ribosomal protein L13
LOC_Os09g19954	No	No	No	Yes	No	No	No	No	No	No	No	No	K02878 RP-L16, rplP	large subunit ribosomal protein L16
LOC_Os07g36090	No	Yes	No	No	No	No	No	Yes	No	No	No	No	K02902 RP-L28, rpmB	large subunit ribosomal protein L28
LOC_Os03g58204	No	Yes	No	No	No	No	No	Yes	No	No	No	No	K02930 RP-L4e, RPL4	large subunit ribosomal protein L4e
LOC_Os02g37862	No	Yes	No	No	No	No	No	No	No	No	No	No	K02934 RP-L6e, RPL6	large subunit ribosomal protein L6e
LOC_Os05g11710	No	Yes	No	No	No	No	No	No	No	No	No	No	K02868 RP-L11e, RPL11	large subunit ribosomal protein L11e
LOC_Os06g35730	No	Yes	No	No	No	No	No	Yes	No	No	No	No	K02868 RP-L11e, RPL11	large subunit ribosomal protein L11e
LOC_Os02g47140	No	Yes	No	No	No	No	No	No	No	No	No	No	K02870 RP-L12e, RPL12	large subunit ribosomal protein L12e
LOC_Os11g05370	No	Yes	No	No	No	No	No	Yes	No	No	No	No	K02898 RP-L26e, RPL26	large subunit ribosomal protein L26e
LOC_Os12g05430	No	Yes	No	No	No	No	No	No	No	No	No	No	K02898 RP-L26e, RPL26	large subunit ribosomal protein L26e
LOC_Os10g41470	No	Yes	No	No	No	No	No	Yes	No	No	No	No	K02901 RP-L27e, RPL27	large subunit ribosomal protein L27e
LOC_Os02g07890	No	Yes	No	No	No	No	No	Yes	No	No	No	No	K02900 RP-L27Ae, RPL27A	large subunit ribosomal protein L27Ae
LOC_Os05g38520	No	Yes	No	No	No	No	No	No	No	No	No	No	K02920 RP-L36e, RPL36	large subunit ribosomal protein L36e
LOC_Os02g02130	No	Yes	No	No	No	No	No	Yes	No	No	No	No	K02922 RP-L37e, RPL37	large subunit ribosomal protein L37e
LOC_Os02g55370	No	Yes	No	No	No	No	No	Yes	No	No	No	No	K02924 RP-L39e, RPL39	large subunit ribosomal protein L39e
LOC_Os09g27930	Yes	No	No	No	No	No	No	No	No	No	No	No	K02927 RP-L40e, RPL40	large subunit ribosomal protein L40e
LOC_Os01g13080	No	Yes	No	No	No	No	No	Yes	No	No	No	No	K02942 RP-LP1, RPLP1	large subunit ribosomal protein LP1
LOC_Os06g48780	No	Yes	No	No	No	No	No	Yes	No	No	No	No	K02942 RP-LP1, RPLP1	large subunit ribosomal protein LP1
03011 Ribosome [BR:ko03011]	No	No	No	No	No	No	No	No	No	No	No	No
03016 Transfer RNA biogenesis [BR:ko03016]	No	No	No	No	No	No	No	No	No	No	No	No
00970 AmiNoacyl-tRNA biosynthesis [PATH:ko00970]	No	No	No	No	No	No	No	No	No	No	No	No
LOC_Os12g22600	No	No	Yes	No	No	No	No	No	Yes	No	No	No	K01893 NARS, asnS	asparaginyl-tRNA synthetase [EC:6.1.1.22]
03013 RNA transport [PATH:ko03013]	No	No	No	No	No	No	No	No	No	No	No	No
LOC_Os05g49890	Yes	No	No	No	No	No	Yes	No	No	No	No	No	K07936 RAN	GTP-binding nuclear protein Ran
LOC_Os01g26160	Yes	No	No	No	No	No	Yes	No	No	No	No	No	K14289 XPO5	exportin-5
LOC_Os01g37842	Yes	No	No	No	No	No	Yes	No	No	No	No	No	K14291 PHAX	phosphorylated adapter RNA export protein
LOC_Os12g06870	Yes	No	No	No	No	No	Yes	No	No	No	No	No	K14297 NUP98, ADAR2	nuclear pore complex protein Nup98-Nup96
LOC_Os03g55660	Yes	No	No	No	No	No	Yes	No	No	No	No	No	K14307 NUPL1	nucleoporin p58/p45
LOC_Os05g41630	Yes	No	No	No	No	No	No	No	No	No	No	No	K03245 EIF3J	translation initiation factor 3 subunit J
LOC_Os02g19770	Yes	No	No	No	No	No	Yes	No	No	No	No	No	K03236 EIF1A	translation initiation factor 1A
LOC_Os04g53606	Yes	No	No	No	No	No	Yes	No	No	No	No	No	K03113 EIF1, SUI1	translation initiation factor 1
LOC_Os05g41900	Yes	No	No	No	No	No	Yes	No	No	No	No	No	K03113 EIF1, SUI1	translation initiation factor 1
LOC_Os12g31380	No	Yes	No	No	No	No	No	Yes	No	No	No	No	K03239 EIF2B1	translation initiation factor eIF-2B subunit alpha
LOC_Os02g05330	Yes	No	No	No	No	No	Yes	No	No	No	No	No	K03257 EIF4A	translation initiation factor 4A
LOC_Os03g17010	Yes	No	No	No	No	No	Yes	No	No	No	No	No	K12881 THOC4, ALY	THO complex subunit 4
03015 mRNA surveillance pathway [PATH:ko03015]	No	No	No	No	No	No	No	No	No	No	No	No
LOC_Os03g17010	Yes	No	No	No	No	No	Yes	No	No	No	No	No	K12881 THOC4, ALY	THO complex subunit 4
LOC_Os05g31020	No	No	Yes	No	No	No	No	No	Yes	No	No	No	K03265 ETF1, ERF1	peptide chain release factor subunit 1
LOC_Os03g62730	No	Yes	No	No	No	No	No	Yes	No	No	No	No	K11584 PPP2R5	protein phosphatase 2 (formerly 2A), regulatory subunit B'
03008 Ribosome biogenesis in eukaryotes [PATH:ko03008]	No	No	No	No	No	No	No	No	No	No	No	No
LOC_Os07g41190	No	Yes	No	No	No	No	No	No	No	No	No	No	K14553 UTP18	U3 small nucleolar RNA-associated protein 18
LOC_Os02g01350	No	Yes	No	No	No	No	No	Yes	No	No	No	No	K14557 UTP6	U3 small nucleolar RNA-associated protein 6
LOC_Os02g30790	No	No	Yes	No	No	No	No	No	No	No	No	No	K14565 NoP58	nucleolar protein 58
LOC_Os03g25450	No	Yes	No	No	No	No	No	Yes	No	No	No	No	K11131 DKC1, NoLA4, CBF5	H/ACA ribonucleoprotein complex subunit 4 [EC:5.4.99.-]
LOC_Os07g44190	No	Yes	No	No	No	No	No	Yes	No	No	No	No	K11131 DKC1, NoLA4, CBF5	H/ACA ribonucleoprotein complex subunit 4 [EC:5.4.99.-]
LOC_Os05g49890	Yes	No	No	No	No	No	Yes	No	No	No	No	No	K07936 RAN	GTP-binding nuclear protein Ran
LOC_Os01g17330	Yes	No	No	No	No	No	Yes	No	No	No	No	No	K03264 EIF6	translation initiation factor 6
LOC_Os07g06820	No	No	No	Yes	No	No	No	No	No	No	No	No	K07178 RIOK1	RIO kinase 1 [EC:2.7.11.1]
03009 Ribosome biogenesis [BR:ko03009]	No	No	No	No	No	No	No	No	No	No	No	No
03012 Translation factors [BR:ko03012]	No	No	No	No	No	No	No	No	No	No	No	No
Folding, sorting and degradation	No	No	No	No	No	No	No	No	No	No	No	No
03110 Chaperones and folding catalysts [BR:ko03110]	No	No	No	No	No	No	No	No	No	No	No	No
03060 Protein export [PATH:ko03060]	No	No	No	No	No	No	No	No	No	No	No	No
LOC_Os05g43390	No	No	Yes	No	No	No	No	No	No	No	No	No	K03106 SRP54, ffh	signal recognition particle subunit SRP54
LOC_Os11g05556	No	Yes	No	No	No	No	No	No	No	No	No	No	K03106 SRP54, ffh	signal recognition particle subunit SRP54
LOC_Os03g55640	No	No	No	Yes	No	No	No	No	No	No	No	No	K03100 lepB	signal peptidase I [EC:3.4.21.89]
04141 Protein processing in endoplasmic reticulum [PATH:ko04141]	No	No	No	No	No	No	No	No	No	No	No	No
LOC_Os03g36730	No	Yes	No	No	No	No	No	No	No	No	No	No	K12669 OST3, OST6	oligosaccharyltransferase complex subunit gamma
LOC_Os06g50300	No	Yes	No	No	No	No	No	Yes	No	No	No	No	K09487 HSP90B, TRA1	heat shock protein 90kDa beta
LOC_Os03g61670	No	No	Yes	No	No	No	No	No	No	No	No	No	K08057 CALR	calreticulin
LOC_Os05g11850	No	Yes	No	No	No	No	No	Yes	No	No	No	No	K01230 MAN1	manNosyl-oligosaccharide alpha-1,2-manNosidase [EC:3.2.1.113]
LOC_Os11g09280	No	No	Yes	No	No	No	No	No	No	No	No	No	K09580 PDIA1, P4HB	protein disulfide-isomerase A1 [EC:5.3.4.1]
LOC_Os09g27830	No	Yes	No	No	No	No	No	Yes	No	No	No	No	K09584 PDIA6, TXNDC7	protein disulfide-isomerase A6 [EC:5.3.4.1]
LOC_Os02g21650	No	Yes	No	No	No	No	No	Yes	No	No	No	No	K14009 BCAP31, BAP31	B-cell receptor-associated protein 31
LOC_Os05g09550	No	Yes	No	No	No	No	No	Yes	No	No	No	No	K13989 DERL2_3	Derlin-2/3
LOC_Os01g62290	No	Yes	No	No	No	No	No	Yes	No	No	No	No	K03283 HSPA1_8	heat shock 70kDa protein 1/8
LOC_Os03g16860	No	Yes	No	No	No	No	No	No	No	No	No	No	K03283 HSPA1_8	heat shock 70kDa protein 1/8
LOC_Os03g16880	Yes	No	No	No	No	No	Yes	No	No	No	No	No	K03283 HSPA1_8	heat shock 70kDa protein 1/8
LOC_Os03g16920	No	No	Yes	No	No	No	No	No	No	No	No	No	K03283 HSPA1_8	heat shock 70kDa protein 1/8
LOC_Os05g38530	No	Yes	No	No	No	No	No	Yes	No	No	No	No	K03283 HSPA1_8	heat shock 70kDa protein 1/8
LOC_Os03g57340	No	Yes	No	No	No	No	No	No	No	No	No	No	K09503 DNAJA2	DnaJ homolog subfamily A member 2
LOC_Os04g01740	No	No	Yes	No	No	No	No	No	Yes	No	No	No	K04079 htpG, HSP90A	molecular chaperone HtpG
LOC_Os08g39140	No	Yes	No	No	No	No	No	Yes	No	No	No	No	K04079 htpG, HSP90A	molecular chaperone HtpG
LOC_Os01g04360	No	No	Yes	No	No	No	No	No	No	No	No	No	K13993 HSP20	HSP20 family protein
LOC_Os01g04370	No	Yes	Yes	No	No	No	No	No	Yes	No	No	No	K13993 HSP20	HSP20 family protein
LOC_Os01g04380	No	No	Yes	No	No	No	No	No	No	No	No	No	K13993 HSP20	HSP20 family protein
LOC_Os02g52150	No	No	No	Yes	No	No	No	No	No	No	No	No	K13993 HSP20	HSP20 family protein
LOC_Os02g54140	No	Yes	Yes	No	No	No	No	No	No	No	Yes	Yes	K13993 HSP20	HSP20 family protein
LOC_Os03g14180	No	No	Yes	No	No	No	No	No	No	No	No	No	K13993 HSP20	HSP20 family protein
LOC_Os03g15960	No	Yes	No	No	No	No	No	Yes	No	No	No	No	K13993 HSP20	HSP20 family protein
LOC_Os04g36750	No	No	Yes	No	No	No	No	No	No	No	No	No	K13993 HSP20	HSP20 family protein
LOC_Os01g56070	No	Yes	No	No	No	No	No	Yes	No	No	No	No	K10666 RNF5	E3 ubiquitin-protein ligase RNF5 [EC:6.3.2.19]
LOC_Os12g43930	No	Yes	No	No	No	No	No	Yes	No	No	No	No	K10666 RNF5	E3 ubiquitin-protein ligase RNF5 [EC:6.3.2.19]
LOC_Os05g01460	No	No	Yes	No	No	No	No	No	No	No	No	No	K09561 STUB1, CHIP	STIP1 homology and U-box containing protein 1 [EC:6.3.2.19]
LOC_Os09g12230	No	Yes	No	No	No	No	No	No	No	No	No	No	K06689 UBE2D_E, UBC4, UBC5	ubiquitin-conjugating enzyme E2 D/E [EC:6.3.2.19]
LOC_Os07g43240	No	No	Yes	No	No	No	No	No	No	No	No	No	K03094 SKP1, CBF3D	S-phase kinase-associated protein 1
04130 SNARE interactions in vesicular transport [PATH:ko04130]	No	No	No	No	No	No	No	No	No	No	No	No
LOC_Os03g57310	No	Yes	No	No	No	No	No	No	No	No	No	No	K08486 STX1B_2_3	syntaxin 1B/2/3
LOC_Os01g73230	No	Yes	No	No	No	No	No	No	No	No	No	No	K08500 SYP6	syntaxin of plants SYP6
LOC_Os02g57510	No	Yes	No	No	No	No	No	Yes	No	No	No	No	K08504 BET1	blocked early in transport 1
04131 SNAREs [BR:ko04131]	No	No	No	No	No	No	No	No	No	No	No	No
04120 Ubiquitin mediated proteolysis [PATH:ko04120]	No	No	No	No	No	No	No	No	No	No	No	No
LOC_Os11g01510	Yes	No	No	No	No	No	Yes	No	No	No	No	No	K03178 UBE1, UBA1	ubiquitin-activating enzyme E1 [EC:6.3.2.19]
LOC_Os09g12230	No	Yes	No	No	No	No	No	No	No	No	No	No	K06689 UBE2D_E, UBC4, UBC5	ubiquitin-conjugating enzyme E2 D/E [EC:6.3.2.19]
LOC_Os09g15320	No	No	Yes	No	No	No	No	No	No	No	No	No	K10579 UBE2M, UBC12	ubiquitin-conjugating enzyme E2 M [EC:6.3.2.19]
LOC_Os05g38830	No	No	Yes	No	No	No	No	No	No	No	No	No	K10590 TRIP12	E3 ubiquitin-protein ligase TRIP12 [EC:6.3.2.19]
LOC_Os05g01460	No	No	Yes	No	No	No	No	No	No	No	No	No	K09561 STUB1, CHIP	STIP1 homology and U-box containing protein 1 [EC:6.3.2.19]
LOC_Os03g24040	No	No	Yes	No	No	No	No	No	Yes	No	No	No	K04506 SIAH1	E3 ubiquitin-protein ligase SIAH1 [EC:6.3.2.19]
LOC_Os07g46560	Yes	No	No	No	No	No	No	No	No	No	No	No	K04506 SIAH1	E3 ubiquitin-protein ligase SIAH1 [EC:6.3.2.19]
LOC_Os02g02380	No	No	No	Yes	No	No	No	No	No	Yes	No	No	K10143 RFWD2, COP1	E3 ubiquitin-protein ligase RFWD2 [EC:6.3.2.19]
LOC_Os01g52110	No	No	Yes	No	No	No	No	No	Yes	No	No	No	K10144 RCHY1, PIRH2	RING finger and CHY zinc finger domain-containing protein 1 [EC:6.3.2.19]
LOC_Os03g05270	No	No	Yes	No	No	No	No	No	No	No	No	No	K10144 RCHY1, PIRH2	RING finger and CHY zinc finger domain-containing protein 1 [EC:6.3.2.19]
LOC_Os03g22680	No	No	Yes	No	No	No	No	No	Yes	No	No	No	K10144 RCHY1, PIRH2	RING finger and CHY zinc finger domain-containing protein 1 [EC:6.3.2.19]
LOC_Os10g31850	Yes	No	No	No	No	No	Yes	No	No	No	No	No	K10144 RCHY1, PIRH2	RING finger and CHY zinc finger domain-containing protein 1 [EC:6.3.2.19]
LOC_Os07g43240	No	No	Yes	No	No	No	No	No	No	No	No	No	K03094 SKP1, CBF3D	S-phase kinase-associated protein 1
LOC_Os01g65920	No	No	Yes	No	No	No	No	No	Yes	No	No	No	K03875 SKP2, FBXL1	F-box and leucine-rich repeat protein 1 (S-phase kinase-associated protein 2)
LOC_Os11g48030	No	Yes	No	No	No	No	No	Yes	No	No	No	No	K03872 TCEB1	transcription elongation factor B, polypeptide 1
04121 Ubiquitin system [BR:ko04121]	No	No	No	No	No	No	No	No	No	No	No	No
04122 Sulfur relay system [PATH:ko04122]	No	No	No	No	No	No	No	No	No	No	No	No
LOC_Os07g28280	No	Yes	No	No	No	No	No	Yes	No	No	No	No	K12161 URM1	ubiquitin related modifier 1
LOC_Os02g04740	No	Yes	No	No	No	No	No	No	No	No	No	No	K03635 MOCS2, moaE	molybdopterin synthase catalytic subunit [EC:2.-.-.-]
03050 Proteasome [PATH:ko03050]	No	No	No	No	No	No	No	No	No	No	No	No
LOC_Os03g37950	No	Yes	No	No	No	No	No	No	No	No	No	No	K03036 PSMD11, RPN6	26S proteasome regulatory subunit N6
LOC_Os01g32800	No	Yes	No	No	No	No	No	Yes	No	No	No	No	K03039 PSMD13, RPN9	26S proteasome regulatory subunit N9
LOC_Os06g07630	No	Yes	No	No	No	No	No	Yes	No	No	No	No	K03065 PSMC3, RPT5	26S proteasome regulatory subunit T5
03051 Proteasome [BR:ko03051]	No	No	No	No	No	No	No	No	No	No	No	No
03018 RNA degradation [PATH:ko03018]	No	No	No	No	No	No	No	No	No	No	No	No
LOC_Os01g47256	No	No	No	No	No	Yes	No	Yes	No	No	No	No	K03681 RRP40, EXOSC3	exosome complex component RRP40
LOC_Os04g58810	No	No	No	Yes	No	No	No	No	No	No	No	No	K12581 CNoT7_8, CAF1, POP2	CCR4-NoT transcription complex subunit 7/8
LOC_Os06g19660	No	Yes	No	No	No	No	No	No	No	No	No	No	K12616 EDC4	enhancer of mRNA-decapping protein 4
LOC_Os07g48360	Yes	No	No	No	No	No	Yes	No	No	No	No	No	K03654 recQ	ATP-dependent DNA helicase RecQ [EC:3.6.4.12]
LOC_Os03g02260	No	Yes	No	No	No	No	No	Yes	No	No	No	No	K04043 dnaK	molecular chaperone DnaK
Replication and repair	No	No	No	No	No	No	No	No	No	No	No	No
03030 DNA replication [PATH:ko03030]	No	No	No	No	No	No	No	No	No	No	No	No
LOC_Os02g58220	Yes	No	No	No	No	No	No	No	No	No	No	No	K10739 RFA2, RPA2	replication factor A2
LOC_Os01g14980	No	Yes	No	No	No	No	No	Yes	No	No	No	No	K10740 RPA3	replication factor A3
LOC_Os02g56130	No	Yes	No	No	No	No	No	Yes	No	No	No	No	K04802 PCNA	proliferating cell nuclear antigen
03032 DNA replication proteins [BR:ko03032]	No	No	No	No	No	No	No	No	No	No	No	No
03036 Chromosome and associated proteins [BR:ko03036]	No	No	No	No	No	No	No	No	No	No	No	No
03410 Base excision repair [PATH:ko03410]	No	No	No	No	No	No	No	No	No	No	No	No
LOC_Os05g50290	No	Yes	No	No	No	No	No	No	No	No	No	No	K01247 alkA	DNA-3-methyladenine glycosylase II [EC:3.2.2.21]
LOC_Os08g38170	No	No	No	No	No	Yes	No	No	No	Yes	Yes	Yes	K01246 tag	DNA-3-methyladenine glycosylase I [EC:3.2.2.20]
LOC_Os02g56130	No	Yes	No	No	No	No	No	Yes	No	No	No	No	K04802 PCNA	proliferating cell nuclear antigen
03420 Nucleotide excision repair [PATH:ko03420]	No	No	No	No	No	No	No	No	No	No	No	No
LOC_Os07g38600	No	Yes	No	No	No	No	No	Yes	No	No	No	No	K10845 TTDA, GTF2H5, TFB5	TFIIH basal transcription factor complex TTD-A subunit
LOC_Os02g58220	Yes	No	No	No	No	No	No	No	No	No	No	No	K10739 RFA2, RPA2	replication factor A2
LOC_Os01g14980	No	Yes	No	No	No	No	No	Yes	No	No	No	No	K10740 RPA3	replication factor A3
LOC_Os02g56130	No	Yes	No	No	No	No	No	Yes	No	No	No	No	K04802 PCNA	proliferating cell nuclear antigen
03430 Mismatch repair [PATH:ko03430]	No	No	No	No	No	No	No	No	No	No	No	No
LOC_Os02g56130	No	Yes	No	No	No	No	No	Yes	No	No	No	No	K04802 PCNA	proliferating cell nuclear antigen
LOC_Os01g56940	Yes	No	No	No	No	No	Yes	No	No	No	No	No	K10746 EXO1	exonuclease 1 [EC:3.1.-.-]
LOC_Os02g58220	Yes	No	No	No	No	No	No	No	No	No	No	No	K10739 RFA2, RPA2	replication factor A2
LOC_Os01g14980	No	Yes	No	No	No	No	No	Yes	No	No	No	No	K10740 RPA3	replication factor A3
03440 Homologous recombination [PATH:ko03440]	No	No	No	No	No	No	No	No	No	No	No	No
LOC_Os02g58220	Yes	No	No	No	No	No	No	No	No	No	No	No	K10739 RFA2, RPA2	replication factor A2
LOC_Os01g14980	No	Yes	No	No	No	No	No	Yes	No	No	No	No	K10740 RPA3	replication factor A3
LOC_Os12g31370	Yes	No	No	No	No	No	No	No	No	No	No	No	K04482 RAD51	DNA repair protein RAD51
03450 Non-homologous end-joining [PATH:ko03450]	No	No	No	No	No	No	No	No	No	No	No	No
03460 Fanconi anemia pathway [PATH:ko03460]	No	No	No	No	No	No	No	No	No	No	No	No
LOC_Os12g31370	Yes	No	No	No	No	No	No	No	No	No	No	No	K04482 RAD51	DNA repair protein RAD51
LOC_Os02g58220	Yes	No	No	No	No	No	No	No	No	No	No	No	K10739 RFA2, RPA2	replication factor A2
LOC_Os01g14980	No	Yes	No	No	No	No	No	Yes	No	No	No	No	K10740 RPA3	replication factor A3
03400 DNA repair and recombination proteins [BR:ko03400]	No	No	No	No	No	No	No	No	No	No	No	No
RNA family	No	No	No	No	No	No	No	No	No	No	No	No
03100 Non-coding RNAs	No	No	No	No	No	No	No	No	No	No	No	No
Environmental Information Processing	No	No	No	No	No	No	No	No	No	No	No	No
Membrane transport	No	No	No	No	No	No	No	No	No	No	No	No
02000 Transporters [BR:ko02000]	No	No	No	No	No	No	No	No	No	No	No	No
02010 ABC transporters [PATH:ko02010]	No	No	No	No	No	No	No	No	No	No	No	No
LOC_Os01g50100	Yes	No	No	No	No	No	Yes	No	No	No	No	No	K05658 ABCB1	ATP-binding cassette, subfamily B (MDR/TAP), member 1
LOC_Os02g09720	No	No	Yes	No	No	No	No	No	No	No	No	No	K05658 ABCB1	ATP-binding cassette, subfamily B (MDR/TAP), member 1
02060 Phosphotransferase system (PTS) [PATH:ko02060]	No	No	No	No	No	No	No	No	No	No	No	No
03070 Bacterial secretion system [PATH:ko03070]	No	No	No	No	No	No	No	No	No	No	No	No
LOC_Os05g43390	No	No	Yes	No	No	No	No	No	No	No	No	No	K03106 SRP54, ffh	signal recognition particle subunit SRP54
LOC_Os11g05556	No	Yes	No	No	No	No	No	No	No	No	No	No	K03106 SRP54, ffh	signal recognition particle subunit SRP54
02044 Secretion system [BR:ko02044]	No	No	No	No	No	No	No	No	No	No	No	No
Signal transduction	No	No	No	No	No	No	No	No	No	No	No	No
02020 Two-component system [PATH:ko02020]	No	No	No	No	No	No	No	No	No	No	No	No
02022 Two-component system [BR:ko02022]	No	No	No	No	No	No	No	No	No	No	No	No
04010 MAPK signaling pathway [PATH:ko04010]	No	No	No	No	No	No	No	No	No	No	No	No
LOC_Os02g05480	Yes	No	No	No	No	No	No	No	No	No	No	No	K04371 ERK1_2	extracellular signal-regulated kinase 1/2 [EC:2.7.11.24]
LOC_Os03g17700	No	No	No	Yes	No	No	No	No	No	No	No	No	K04371 ERK1_2	extracellular signal-regulated kinase 1/2 [EC:2.7.11.24]
LOC_Os06g48590	No	Yes	No	No	No	No	No	Yes	No	No	No	No	K04371 ERK1_2	extracellular signal-regulated kinase 1/2 [EC:2.7.11.24]
LOC_Os02g50860	No	Yes	No	No	No	No	No	No	No	No	No	No	K04392 RAC1	Ras-related C3 botulinum toxin substrate 1
LOC_Os01g62290	No	Yes	No	No	No	No	No	Yes	No	No	No	No	K03283 HSPA1_8	heat shock 70kDa protein 1/8
LOC_Os03g16860	No	Yes	No	No	No	No	No	No	No	No	No	No	K03283 HSPA1_8	heat shock 70kDa protein 1/8
LOC_Os03g16880	Yes	No	No	No	No	No	Yes	No	No	No	No	No	K03283 HSPA1_8	heat shock 70kDa protein 1/8
LOC_Os03g16920	No	No	Yes	No	No	No	No	No	No	No	No	No	K03283 HSPA1_8	heat shock 70kDa protein 1/8
LOC_Os05g38530	No	Yes	No	No	No	No	No	Yes	No	No	No	No	K03283 HSPA1_8	heat shock 70kDa protein 1/8
04013 MAPK signaling pathway - fly [PATH:ko04013]	No	No	No	No	No	No	No	No	No	No	No	No
LOC_Os02g05480	Yes	No	No	No	No	No	No	No	No	No	No	No	K04371 ERK1_2	extracellular signal-regulated kinase 1/2 [EC:2.7.11.24]
LOC_Os03g17700	No	No	No	Yes	No	No	No	No	No	No	No	No	K04371 ERK1_2	extracellular signal-regulated kinase 1/2 [EC:2.7.11.24]
LOC_Os06g48590	No	Yes	No	No	No	No	No	Yes	No	No	No	No	K04371 ERK1_2	extracellular signal-regulated kinase 1/2 [EC:2.7.11.24]
04011 MAPK signaling pathway - yeast [PATH:ko04011]	No	No	No	No	No	No	No	No	No	No	No	No
04012 ErbB signaling pathway [PATH:ko04012]	No	No	No	No	No	No	No	No	No	No	No	No
LOC_Os02g05480	Yes	No	No	No	No	No	No	No	No	No	No	No	K04371 ERK1_2	extracellular signal-regulated kinase 1/2 [EC:2.7.11.24]
LOC_Os03g17700	No	No	No	Yes	No	No	No	No	No	No	No	No	K04371 ERK1_2	extracellular signal-regulated kinase 1/2 [EC:2.7.11.24]
LOC_Os06g48590	No	Yes	No	No	No	No	No	Yes	No	No	No	No	K04371 ERK1_2	extracellular signal-regulated kinase 1/2 [EC:2.7.11.24]
LOC_Os03g21620	No	No	Yes	No	No	No	No	No	No	No	No	No	K04688 RPS6KB	p70 ribosomal S6 kinase [EC:2.7.11.1]
04310 Wnt signaling pathway [PATH:ko04310]	No	No	No	No	No	No	No	No	No	No	No	No
LOC_Os03g24040	No	No	Yes	No	No	No	No	No	Yes	No	No	No	K04506 SIAH1	E3 ubiquitin-protein ligase SIAH1 [EC:6.3.2.19]
LOC_Os07g46560	Yes	No	No	No	No	No	No	No	No	No	No	No	K04506 SIAH1	E3 ubiquitin-protein ligase SIAH1 [EC:6.3.2.19]
LOC_Os01g55270	No	Yes	No	No	No	No	No	Yes	No	No	No	No	K04507 CACYBP, SIP	calcyclin binding protein
LOC_Os07g43240	No	No	Yes	No	No	No	No	No	No	No	No	No	K03094 SKP1, CBF3D	S-phase kinase-associated protein 1
LOC_Os02g50860	No	Yes	No	No	No	No	No	No	No	No	No	No	K04392 RAC1	Ras-related C3 botulinum toxin substrate 1
04330 Notch signaling pathway [PATH:ko04330]	No	No	No	No	No	No	No	No	No	No	No	No
LOC_Os10g28040	No	Yes	No	No	No	No	No	Yes	No	No	No	No	K06062 PCAF, KAT2, GCN5	histone acetyltransferase [EC:2.3.1.48]
LOC_Os02g12380	No	No	Yes	No	No	No	No	No	No	No	No	No	K06067 HDAC1_2	histone deacetylase 1/2 [EC:3.5.1.98]
04340 Hedgehog signaling pathway [PATH:ko04340]	No	No	No	No	No	No	No	No	No	No	No	No
04350 TGF-beta signaling pathway [PATH:ko04350]	No	No	No	No	No	No	No	No	No	No	No	No
LOC_Os07g43240	No	No	Yes	No	No	No	No	No	No	No	No	No	K03094 SKP1, CBF3D	S-phase kinase-associated protein 1
LOC_Os02g05480	Yes	No	No	No	No	No	No	No	No	No	No	No	K04371 ERK1_2	extracellular signal-regulated kinase 1/2 [EC:2.7.11.24]
LOC_Os03g17700	No	No	No	Yes	No	No	No	No	No	No	No	No	K04371 ERK1_2	extracellular signal-regulated kinase 1/2 [EC:2.7.11.24]
LOC_Os06g48590	No	Yes	No	No	No	No	No	Yes	No	No	No	No	K04371 ERK1_2	extracellular signal-regulated kinase 1/2 [EC:2.7.11.24]
LOC_Os03g21620	No	No	Yes	No	No	No	No	No	No	No	No	No	K04688 RPS6KB	p70 ribosomal S6 kinase [EC:2.7.11.1]
04390 Hippo signaling pathway [PATH:ko04390]	No	No	No	No	No	No	No	No	No	No	No	No
LOC_Os10g25674	Yes	No	No	No	No	No	No	No	No	No	No	No	K06685 MOB1, Mats	MOB kinase activator 1
04391 Hippo signaling pathway -fly [PATH:ko04391]	No	No	No	No	No	No	No	No	No	No	No	No
LOC_Os10g25674	Yes	No	No	No	No	No	No	No	No	No	No	No	K06685 MOB1, Mats	MOB kinase activator 1
04370 VEGF signaling pathway [PATH:ko04370]	No	No	No	No	No	No	No	No	No	No	No	No
LOC_Os02g05480	Yes	No	No	No	No	No	No	No	No	No	No	No	K04371 ERK1_2	extracellular signal-regulated kinase 1/2 [EC:2.7.11.24]
LOC_Os03g17700	No	No	No	Yes	No	No	No	No	No	No	No	No	K04371 ERK1_2	extracellular signal-regulated kinase 1/2 [EC:2.7.11.24]
LOC_Os06g48590	No	Yes	No	No	No	No	No	Yes	No	No	No	No	K04371 ERK1_2	extracellular signal-regulated kinase 1/2 [EC:2.7.11.24]
LOC_Os02g50860	No	Yes	No	No	No	No	No	No	No	No	No	No	K04392 RAC1	Ras-related C3 botulinum toxin substrate 1
04630 Jak-STAT signaling pathway [PATH:ko04630]	No	No	No	No	No	No	No	No	No	No	No	No
04064 NF-kappa B signaling pathway [PATH:ko04064]	No	No	No	No	No	No	No	No	No	No	No	No
LOC_Os06g20430	No	No	Yes	No	No	No	No	No	No	No	No	No	K05399 LBP	lipopolysaccharide-binding protein
04668 TNF signaling pathway [PATH:ko04668]	No	No	No	No	No	No	No	No	No	No	No	No
LOC_Os02g05480	Yes	No	No	No	No	No	No	No	No	No	No	No	K04371 ERK1_2	extracellular signal-regulated kinase 1/2 [EC:2.7.11.24]
LOC_Os03g17700	No	No	No	Yes	No	No	No	No	No	No	No	No	K04371 ERK1_2	extracellular signal-regulated kinase 1/2 [EC:2.7.11.24]
LOC_Os06g48590	No	Yes	No	No	No	No	No	Yes	No	No	No	No	K04371 ERK1_2	extracellular signal-regulated kinase 1/2 [EC:2.7.11.24]
04066 HIF-1 signaling pathway [PATH:ko04066]	No	No	No	No	No	No	No	No	No	No	No	No
LOC_Os02g05480	Yes	No	No	No	No	No	No	No	No	No	No	No	K04371 ERK1_2	extracellular signal-regulated kinase 1/2 [EC:2.7.11.24]
LOC_Os03g17700	No	No	No	Yes	No	No	No	No	No	No	No	No	K04371 ERK1_2	extracellular signal-regulated kinase 1/2 [EC:2.7.11.24]
LOC_Os06g48590	No	Yes	No	No	No	No	No	Yes	No	No	No	No	K04371 ERK1_2	extracellular signal-regulated kinase 1/2 [EC:2.7.11.24]
LOC_Os03g21620	No	No	Yes	No	No	No	No	No	No	No	No	No	K04688 RPS6KB	p70 ribosomal S6 kinase [EC:2.7.11.1]
LOC_Os11g48030	No	Yes	No	No	No	No	No	Yes	No	No	No	No	K03872 TCEB1	transcription elongation factor B, polypeptide 1
LOC_Os05g09500	No	No	Yes	No	No	No	No	No	No	No	No	No	K00844 HK	hexokinase [EC:2.7.1.1]
LOC_Os06g45590	No	No	No	Yes	No	No	No	No	No	No	No	No	K00134 GAPDH, gapA	glyceraldehyde 3-phosphate dehydrogenase [EC:1.2.1.12]
04020 Calcium signaling pathway [PATH:ko04020]	No	No	No	No	No	No	No	No	No	No	No	No
04070 PhosphatidyliNositol signaling system [PATH:ko04070]	No	No	No	No	No	No	No	No	No	No	No	No
LOC_Os02g26720	No	No	Yes	No	No	No	No	No	Yes	No	No	No	K00913 ITPK1	iNositol-1,3,4-trisphosphate 5/6-kinase / iNositol-tetrakisphosphate 1-kinase [EC:2.7.1.159 2.7.1.134]
LOC_Os04g59540	No	No	Yes	No	No	No	No	No	Yes	No	No	No	K00921 PIKFYVE, FAB1	1-phosphatidyliNositol-3-phosphate 5-kinase [EC:2.7.1.150]
LOC_Os09g23740	No	No	No	Yes	No	No	No	No	No	No	No	No	K00921 PIKFYVE, FAB1	1-phosphatidyliNositol-3-phosphate 5-kinase [EC:2.7.1.150]
04151 PI3K-Akt signaling pathway [PATH:ko04151]	No	No	No	No	No	No	No	No	No	No	No	No
LOC_Os02g05480	Yes	No	No	No	No	No	No	No	No	No	No	No	K04371 ERK1_2	extracellular signal-regulated kinase 1/2 [EC:2.7.11.24]
LOC_Os03g17700	No	No	No	Yes	No	No	No	No	No	No	No	No	K04371 ERK1_2	extracellular signal-regulated kinase 1/2 [EC:2.7.11.24]
LOC_Os06g48590	No	Yes	No	No	No	No	No	Yes	No	No	No	No	K04371 ERK1_2	extracellular signal-regulated kinase 1/2 [EC:2.7.11.24]
LOC_Os02g50860	No	Yes	No	No	No	No	No	No	No	No	No	No	K04392 RAC1	Ras-related C3 botulinum toxin substrate 1
LOC_Os03g21620	No	No	Yes	No	No	No	No	No	No	No	No	No	K04688 RPS6KB	p70 ribosomal S6 kinase [EC:2.7.11.1]
LOC_Os03g62730	No	Yes	No	No	No	No	No	Yes	No	No	No	No	K11584 PPP2R5	protein phosphatase 2 (formerly 2A), regulatory subunit B'
LOC_Os04g01740	No	No	Yes	No	No	No	No	No	Yes	No	No	No	K04079 htpG, HSP90A	molecular chaperone HtpG
LOC_Os08g39140	No	Yes	No	No	No	No	No	Yes	No	No	No	No	K04079 htpG, HSP90A	molecular chaperone HtpG
LOC_Os06g50300	No	Yes	No	No	No	No	No	Yes	No	No	No	No	K09487 HSP90B, TRA1	heat shock protein 90kDa beta
04150 mTOR signaling pathway [PATH:ko04150]	No	No	No	No	No	No	No	No	No	No	No	No
LOC_Os03g21620	No	No	Yes	No	No	No	No	No	No	No	No	No	K04688 RPS6KB	p70 ribosomal S6 kinase [EC:2.7.11.1]
LOC_Os02g05480	Yes	No	No	No	No	No	No	No	No	No	No	No	K04371 ERK1_2	extracellular signal-regulated kinase 1/2 [EC:2.7.11.24]
LOC_Os03g17700	No	No	No	Yes	No	No	No	No	No	No	No	No	K04371 ERK1_2	extracellular signal-regulated kinase 1/2 [EC:2.7.11.24]
LOC_Os06g48590	No	Yes	No	No	No	No	No	Yes	No	No	No	No	K04371 ERK1_2	extracellular signal-regulated kinase 1/2 [EC:2.7.11.24]
04075 Plant hormone signal transduction [PATH:ko04075]	No	No	No	No	No	No	No	No	No	No	No	No
LOC_Os01g63770	No	Yes	No	No	No	No	No	No	No	No	No	No	K13946 AUX1, LAX	auxin influx carrier (AUX1 LAX family)
LOC_Os01g55940	No	No	Yes	No	No	No	No	No	Yes	No	No	No	K14487 GH3	auxin responsive GH3 gene family
LOC_Os02g07110	No	No	No	No	No	Yes	No	No	No	No	Yes	Yes	K14488 SAUR	SAUR family protein
LOC_Os02g42990	No	Yes	No	No	No	No	No	No	No	No	No	No	K14488 SAUR	SAUR family protein
LOC_Os02g52990	No	Yes	No	No	No	No	No	No	No	No	No	No	K14488 SAUR	SAUR family protein
LOC_Os04g45370	No	Yes	No	No	No	No	No	Yes	No	No	No	No	K14488 SAUR	SAUR family protein
LOC_Os06g45950	No	Yes	No	No	No	No	No	No	No	No	No	No	K14488 SAUR	SAUR family protein
LOC_Os06g45970	No	Yes	No	No	No	No	No	Yes	No	No	No	No	K14488 SAUR	SAUR family protein
LOC_Os06g50040	No	Yes	No	No	No	No	No	Yes	No	No	No	No	K14488 SAUR	SAUR family protein
LOC_Os05g09410	No	No	No	Yes	No	No	No	No	No	Yes	No	No	K14490 AHP	histidine-containing phosphotransfer peotein
LOC_Os06g08440	No	Yes	No	No	No	No	No	Yes	No	No	No	No	K14491 ARR-B	two-component response regulator ARR-B family
LOC_Os02g35180	No	No	No	Yes	No	No	No	No	No	Yes	No	No	K14492 ARR-A	two-component response regulator ARR-A family
LOC_Os04g57720	No	Yes	No	No	No	No	No	No	No	No	No	No	K14492 ARR-A	two-component response regulator ARR-A family
LOC_Os11g04720	No	No	No	Yes	No	No	No	No	No	Yes	No	No	K14492 ARR-A	two-component response regulator ARR-A family
LOC_Os10g42280	No	Yes	No	No	No	No	No	No	No	No	No	No	K14496 PYL	abscisic acid receptor PYR/PYL family
LOC_Os01g46760	No	Yes	No	No	No	No	No	No	No	No	No	No	K14497 PP2C	protein phosphatase 2C [EC:3.1.3.16]
LOC_Os05g38290	No	No	Yes	No	No	No	No	No	Yes	No	No	No	K14497 PP2C	protein phosphatase 2C [EC:3.1.3.16]
LOC_Os05g46040	No	No	Yes	No	No	No	No	No	Yes	No	No	No	K14497 PP2C	protein phosphatase 2C [EC:3.1.3.16]
LOC_Os05g49730	No	No	Yes	No	No	No	No	No	Yes	No	No	No	K14497 PP2C	protein phosphatase 2C [EC:3.1.3.16]
LOC_Os09g15670	No	Yes	No	No	No	No	No	No	No	No	No	No	K14497 PP2C	protein phosphatase 2C [EC:3.1.3.16]
LOC_Os03g27280	No	No	Yes	No	No	No	No	No	No	No	No	No	K14498 SNRK2	serine/threonine-protein kinase SRK2 [EC:2.7.11.1]
LOC_Os04g35240	No	Yes	No	No	No	No	No	Yes	No	No	No	No	K14498 SNRK2	serine/threonine-protein kinase SRK2 [EC:2.7.11.1]
LOC_Os07g42940	Yes	No	No	No	No	No	Yes	No	No	No	No	No	K14498 SNRK2	serine/threonine-protein kinase SRK2 [EC:2.7.11.1]
LOC_Os01g64000	No	No	Yes	No	No	No	No	No	No	No	No	No	K14432 ABF	ABA responsive element binding factor
LOC_Os06g10880	No	Yes	No	No	No	No	No	No	No	No	No	No	K14432 ABF	ABA responsive element binding factor
LOC_Os02g32610	No	No	No	Yes	No	No	No	No	No	No	No	No	K14510 CTR1	serine/threonine-protein kinase CTR1 [EC:2.7.11.1]
LOC_Os02g10700	No	Yes	No	No	No	No	No	No	No	No	No	No	K14515 EBF1_2	EIN3-binding F-box protein
LOC_Os03g08320	No	No	No	No	Yes	No	Yes	No	No	No	No	No	K13464 JAZ	jasmonate ZIM domain-containing protein
LOC_Os03g08330	No	No	No	Yes	No	No	No	No	No	No	No	No	K13464 JAZ	jasmonate ZIM domain-containing protein
LOC_Os03g28940	Yes	No	No	No	No	No	Yes	No	No	No	No	No	K13464 JAZ	jasmonate ZIM domain-containing protein
LOC_Os09g26780	No	No	Yes	No	No	No	No	No	No	No	No	No	K13464 JAZ	jasmonate ZIM domain-containing protein
LOC_Os10g25230	No	No	No	Yes	No	No	No	No	No	No	No	No	K13464 JAZ	jasmonate ZIM domain-containing protein
LOC_Os10g25290	Yes	No	No	No	No	No	No	No	No	No	No	No	K13464 JAZ	jasmonate ZIM domain-containing protein
LOC_Os03g46440	Yes	No	No	No	No	No	No	No	No	No	No	No	K14508 NPR1	regulatory protein NPR1
LOC_Os02g10140	No	No	Yes	No	No	No	No	No	No	No	No	No	K14431 TGA	transcription factor TGA
LOC_Os04g54474	No	Yes	No	No	No	No	No	Yes	No	No	No	No	K14431 TGA	transcription factor TGA
LOC_Os07g48820	No	Yes	No	No	No	No	No	Yes	No	No	No	No	K14431 TGA	transcription factor TGA
LOC_Os08g07970	No	Yes	No	No	No	No	No	Yes	No	No	No	No	K14431 TGA	transcription factor TGA
LOC_Os01g28450	No	No	No	No	Yes	No	No	No	No	No	No	No	K13449 PR1	pathogenesis-related protein 1
Signaling molecules and interaction	No	No	No	No	No	No	No	No	No	No	No	No
04030 G protein-coupled receptors [BR:ko04030]	No	No	No	No	No	No	No	No	No	No	No	No
01020 Enzyme-linked receptors [BR:ko01020]	No	No	No	No	No	No	No	No	No	No	No	No
04050 Cytokine receptors [BR:ko04050]	No	No	No	No	No	No	No	No	No	No	No	No
03310 Nuclear receptors [BR:ko03310]	No	No	No	No	No	No	No	No	No	No	No	No
04040 Ion channels [BR:ko04040]	No	No	No	No	No	No	No	No	No	No	No	No
04031 GTP-binding proteins [BR:ko04031]	No	No	No	No	No	No	No	No	No	No	No	No
04080 Neuroactive ligand-receptor interaction [PATH:ko04080]	No	No	No	No	No	No	No	No	No	No	No	No
04060 Cytokine-cytokine receptor interaction [PATH:ko04060]	No	No	No	No	No	No	No	No	No	No	No	No
04052 Cytokines [BR:ko04052]	No	No	No	No	No	No	No	No	No	No	No	No
04512 ECM-receptor interaction [PATH:ko04512]	No	No	No	No	No	No	No	No	No	No	No	No
04514 Cell adhesion molecules (CAMs) [PATH:ko04514]	No	No	No	No	No	No	No	No	No	No	No	No
04516 Cell adhesion molecules and their ligands [BR:ko04516]	No	No	No	No	No	No	No	No	No	No	No	No
04090 CD Molecules [BR:ko04090]	No	No	No	No	No	No	No	No	No	No	No	No
04091 Glycan bindng proteins [BR:ko04091]	No	No	No	No	No	No	No	No	No	No	No	No
02042 Bacterial toxins [BR:ko02042]	No	No	No	No	No	No	No	No	No	No	No	No
Cellular Processes	No	No	No	No	No	No	No	No	No	No	No	No
Transport and catabolism	No	No	No	No	No	No	No	No	No	No	No	No
04144 Endocytosis [PATH:ko04144]	No	No	No	No	No	No	No	No	No	No	No	No
LOC_Os05g07880	No	No	No	Yes	No	No	No	No	No	No	No	No	K01115 PLD1_2	phospholipase D1/2 [EC:3.1.4.4]
LOC_Os06g40180	No	No	No	Yes	No	No	No	No	No	No	No	No	K01115 PLD1_2	phospholipase D1/2 [EC:3.1.4.4]
LOC_Os01g62290	No	Yes	No	No	No	No	No	Yes	No	No	No	No	K03283 HSPA1_8	heat shock 70kDa protein 1/8
LOC_Os03g16860	No	Yes	No	No	No	No	No	No	No	No	No	No	K03283 HSPA1_8	heat shock 70kDa protein 1/8
LOC_Os03g16880	Yes	No	No	No	No	No	Yes	No	No	No	No	No	K03283 HSPA1_8	heat shock 70kDa protein 1/8
LOC_Os03g16920	No	No	Yes	No	No	No	No	No	No	No	No	No	K03283 HSPA1_8	heat shock 70kDa protein 1/8
LOC_Os05g38530	No	Yes	No	No	No	No	No	Yes	No	No	No	No	K03283 HSPA1_8	heat shock 70kDa protein 1/8
LOC_Os01g59800	Yes	No	No	No	No	No	Yes	No	No	No	No	No	K12190 VPS36, EAP45	ESCRT-II complex subunit VPS36
LOC_Os01g72230	No	No	No	Yes	No	No	No	No	No	Yes	No	No	K12486 SMAP	stromal membrane-associated protein
LOC_Os02g10480	No	Yes	No	No	No	No	No	Yes	No	No	No	No	K12486 SMAP	stromal membrane-associated protein
04145 Phagosome [PATH:ko04145]	No	No	No	No	No	No	No	No	No	No	No	No
LOC_Os01g51380	No	No	Yes	No	No	No	No	No	No	No	No	No	K02147 ATPeVB, ATP6B1	V-type H+-transporting ATPase subunit B [EC:3.6.3.14]
LOC_Os04g51270	No	No	Yes	No	No	No	No	No	No	No	No	No	K02152 ATPeVG, ATP6G1	V-type H+-transporting ATPase subunit G [EC:3.6.3.14]
LOC_Os01g18050	No	No	No	Yes	No	No	No	No	No	Yes	No	No	K07375 TUBB	tubulin beta
LOC_Os01g59150	No	Yes	No	No	No	No	No	Yes	No	No	No	No	K07375 TUBB	tubulin beta
LOC_Os06g45990	Yes	No	No	No	No	No	Yes	No	No	No	No	No	K07375 TUBB	tubulin beta
LOC_Os04g59540	No	No	Yes	No	No	No	No	No	Yes	No	No	No	K00921 PIKFYVE, FAB1	1-phosphatidyliNositol-3-phosphate 5-kinase [EC:2.7.1.150]
LOC_Os09g23740	No	No	No	Yes	No	No	No	No	No	No	No	No	K00921 PIKFYVE, FAB1	1-phosphatidyliNositol-3-phosphate 5-kinase [EC:2.7.1.150]
LOC_Os03g61670	No	No	Yes	No	No	No	No	No	No	No	No	No	K08057 CALR	calreticulin
LOC_Os02g50860	No	Yes	No	No	No	No	No	No	No	No	No	No	K04392 RAC1	Ras-related C3 botulinum toxin substrate 1
04142 Lysosome [PATH:ko04142]	No	No	No	No	No	No	No	No	No	No	No	No
LOC_Os04g24600	No	Yes	Yes	No	No	No	No	Yes	No	No	No	No	K01373 CTSF	cathepsin F [EC:3.4.22.41]
LOC_Os09g27030	No	No	Yes	No	No	No	No	No	Yes	No	No	No	K01366 CTSH	cathepsin H [EC:3.4.22.16]
LOC_Os01g37910	No	No	Yes	No	No	No	No	No	No	No	No	No	K01369 LGMN	legumain [EC:3.4.22.34]
LOC_Os05g51570	No	No	Yes	No	No	No	No	No	Yes	No	No	No	K01369 LGMN	legumain [EC:3.4.22.34]
LOC_Os07g38790	No	No	No	Yes	No	No	No	No	No	Yes	No	No	K12373 HEXA_B	hexosaminidase [EC:3.2.1.52]
LOC_Os11g02150	No	No	Yes	No	No	No	No	No	No	No	No	No	K12382 PSAP, SGP1	saposin
LOC_Os01g70550	No	No	Yes	No	No	No	No	No	No	No	No	No	K10532 HGSNAT	heparan-alpha-glucosaminide N-acetyltransferase [EC:2.3.1.78]
04146 Peroxisome [PATH:ko04146]	No	No	No	No	No	No	No	No	No	No	No	No
LOC_Os01g01720	No	Yes	No	No	No	No	No	Yes	No	No	No	No	K13343 PEX14	peroxin-14
LOC_Os02g13270	No	Yes	No	No	No	No	No	No	No	No	No	No	K13347 PXMP2, PMP22	peroxisomal membrane protein 2
LOC_Os03g15860	No	No	Yes	No	No	No	No	No	No	No	No	No	K13354 SLC25A17, PMP34	solute carrier family 25 (peroxisomal adenine nucleotide transporter), member 17
LOC_Os06g24704	No	No	Yes	No	No	No	No	No	No	No	No	No	K00232 E1.3.3.6, ACOX1, ACOX3	acyl-CoA oxidase [EC:1.3.3.6]
LOC_Os11g39220	No	No	Yes	No	No	No	No	No	Yes	No	No	No	K00232 E1.3.3.6, ACOX1, ACOX3	acyl-CoA oxidase [EC:1.3.3.6]
LOC_Os02g57260	No	No	Yes	No	No	No	No	No	No	No	No	No	K07513 ACAA1	acetyl-CoA acyltransferase 1 [EC:2.3.1.16]
LOC_Os01g48910	No	No	Yes	No	No	No	No	No	No	No	No	No	K01897 ACSL, fadD	long-chain acyl-CoA synthetase [EC:6.2.1.3]
LOC_Os05g04170	No	No	No	No	No	Yes	No	Yes	No	No	No	No	K01897 ACSL, fadD	long-chain acyl-CoA synthetase [EC:6.2.1.3]
LOC_Os05g25310	No	Yes	No	No	No	No	No	Yes	No	No	No	No	K01897 ACSL, fadD	long-chain acyl-CoA synthetase [EC:6.2.1.3]
LOC_Os12g04990	No	No	Yes	No	No	No	No	No	No	No	No	No	K01897 ACSL, fadD	long-chain acyl-CoA synthetase [EC:6.2.1.3]
LOC_Os08g44360	No	No	No	No	Yes	No	No	No	No	No	Yes	Yes	K13356 FAR	fatty acyl-CoA reductase [EC:1.2.1.-]
LOC_Os01g16350	No	No	Yes	No	No	No	No	No	Yes	No	No	No	K01640 E4.1.3.4, HMGCL, hmgL	hydroxymethylglutaryl-CoA lyase [EC:4.1.3.4]
LOC_Os04g53210	No	No	Yes	No	No	No	No	No	Yes	No	No	No	K11517 HAO	(S)-2-hydroxy-acid oxidase [EC:1.1.3.15]
LOC_Os04g53214	Yes	No	No	No	No	No	No	No	No	No	No	No	K11517 HAO	(S)-2-hydroxy-acid oxidase [EC:1.1.3.15]
LOC_Os07g05820	No	No	No	Yes	No	No	No	No	No	No	No	No	K11517 HAO	(S)-2-hydroxy-acid oxidase [EC:1.1.3.15]
LOC_Os07g42440	No	Yes	No	No	No	No	No	Yes	No	No	No	No	K11517 HAO	(S)-2-hydroxy-acid oxidase [EC:1.1.3.15]
LOC_Os06g51150	No	No	Yes	No	No	No	No	No	No	No	No	No	K03781 katE, CAT, catB, srpA	catalase [EC:1.11.1.6]
LOC_Os08g44770	No	Yes	No	No	No	No	No	Yes	No	No	No	No	K04565 SOD1	superoxide dismutase, Cu-Zn family [EC:1.15.1.1]
LOC_Os06g02500	No	Yes	No	No	No	No	No	Yes	No	No	No	No	K04564 SOD2	superoxide dismutase, Fe-Mn family [EC:1.15.1.1]
04140 Regulation of autophagy [PATH:ko04140]	No	No	No	No	No	No	No	No	No	No	No	No
LOC_Os03g44200	No	No	Yes	No	No	No	No	No	No	No	No	No	K08334 BECN1, VPS30, ATG6	beclin 1
LOC_Os01g42850	No	No	Yes	No	No	No	No	No	No	No	No	No	K08337 ATG7	autophagy-related protein 7
LOC_Os04g53240	No	No	Yes	No	No	No	No	No	No	No	No	No	K08341 GABARAP, ATG8, LC3	GABA(A) receptor-associated protein (autophagy-related protein 8)
LOC_Os04g58560	No	No	Yes	No	No	No	No	No	No	No	No	No	K08342 ATG4	autophagy-related protein 4 [EC:3.4.22.-]
LOC_Os01g10290	No	No	Yes	No	No	No	No	No	No	No	No	No	K08343 ATG3	autophagy-related protein 3
Cell motility	No	No	No	No	No	No	No	No	No	No	No	No
02030 Bacterial chemotaxis [PATH:ko02030]	No	No	No	No	No	No	No	No	No	No	No	No
02035 Bacterial motility proteins [BR:ko02035]	No	No	No	No	No	No	No	No	No	No	No	No
02040 Flagellar assembly [PATH:ko02040]	No	No	No	No	No	No	No	No	No	No	No	No
04810 Regulation of actin cytoskeleton [PATH:ko04810]	No	No	No	No	No	No	No	No	No	No	No	No
LOC_Os02g05480	Yes	No	No	No	No	No	No	No	No	No	No	No	K04371 ERK1_2	extracellular signal-regulated kinase 1/2 [EC:2.7.11.24]
LOC_Os03g17700	No	No	No	Yes	No	No	No	No	No	No	No	No	K04371 ERK1_2	extracellular signal-regulated kinase 1/2 [EC:2.7.11.24]
LOC_Os06g48590	No	Yes	No	No	No	No	No	Yes	No	No	No	No	K04371 ERK1_2	extracellular signal-regulated kinase 1/2 [EC:2.7.11.24]
LOC_Os02g50860	No	Yes	No	No	No	No	No	No	No	No	No	No	K04392 RAC1	Ras-related C3 botulinum toxin substrate 1
LOC_Os04g59540	No	No	Yes	No	No	No	No	No	Yes	No	No	No	K00921 PIKFYVE, FAB1	1-phosphatidyliNositol-3-phosphate 5-kinase [EC:2.7.1.150]
LOC_Os09g23740	No	No	No	Yes	No	No	No	No	No	No	No	No	K00921 PIKFYVE, FAB1	1-phosphatidyliNositol-3-phosphate 5-kinase [EC:2.7.1.150]
LOC_Os03g13950	No	No	Yes	No	No	No	No	No	No	No	No	No	K05765 CFL	cofilin
LOC_Os03g60580	No	No	Yes	No	No	No	No	No	Yes	No	No	No	K05765 CFL	cofilin
04812 Cytoskeleton proteins [BR:ko04812]	No	No	No	No	No	No	No	No	No	No	No	No
Cell growth and death	No	No	No	No	No	No	No	No	No	No	No	No
04110 Cell cycle [PATH:ko04110]	No	No	No	No	No	No	No	No	No	No	No	No
LOC_Os02g12380	No	No	Yes	No	No	No	No	No	No	No	No	No	K06067 HDAC1_2	histone deacetylase 1/2 [EC:3.5.1.98]
LOC_Os02g33430	Yes	No	No	No	No	No	No	No	No	No	No	No	K06620 E2F1_3	E2F transcription factor 1/3
LOC_Os07g43240	No	No	Yes	No	No	No	No	No	No	No	No	No	K03094 SKP1, CBF3D	S-phase kinase-associated protein 1
LOC_Os01g65920	No	No	Yes	No	No	No	No	No	Yes	No	No	No	K03875 SKP2, FBXL1	F-box and leucine-rich repeat protein 1 (S-phase kinase-associated protein 2)
LOC_Os03g49750	Yes	No	No	No	No	No	Yes	No	No	No	No	No	K08866 TTK, MPS1	serine/threonine-protein kinase TTK/MPS1 [EC:2.7.12.1]
LOC_Os02g56130	No	Yes	No	No	No	No	No	Yes	No	No	No	No	K04802 PCNA	proliferating cell nuclear antigen
LOC_Os03g55200	Yes	No	No	No	No	No	No	No	No	No	No	No	K02607 ORC5	origin recognition complex subunit 5
04111 Cell cycle - yeast [PATH:ko04111]	No	No	No	No	No	No	No	No	No	No	No	No
LOC_Os03g55200	Yes	No	No	No	No	No	No	No	No	No	No	No	K02607 ORC5	origin recognition complex subunit 5
LOC_Os07g43240	No	No	Yes	No	No	No	No	No	No	No	No	No	K03094 SKP1, CBF3D	S-phase kinase-associated protein 1
LOC_Os03g49750	Yes	No	No	No	No	No	Yes	No	No	No	No	No	K08866 TTK, MPS1	serine/threonine-protein kinase TTK/MPS1 [EC:2.7.12.1]
LOC_Os10g25674	Yes	No	No	No	No	No	No	No	No	No	No	No	K06685 MOB1, Mats	MOB kinase activator 1
04112 Cell cycle - Caulobacter [PATH:ko04112]	No	No	No	No	No	No	No	No	No	No	No	No
LOC_Os03g44420	No	No	No	Yes	No	No	No	No	No	Yes	No	No	K03531 ftsZ	cell division protein FtsZ
04113 Meiosis - yeast [PATH:ko04113]	No	No	No	No	No	No	No	No	No	No	No	No
LOC_Os03g55200	Yes	No	No	No	No	No	No	No	No	No	No	No	K02607 ORC5	origin recognition complex subunit 5
LOC_Os03g62730	No	Yes	No	No	No	No	No	Yes	No	No	No	No	K11584 PPP2R5	protein phosphatase 2 (formerly 2A), regulatory subunit B'
04114 Oocyte meiosis [PATH:ko04114]	No	No	No	No	No	No	No	No	No	No	No	No
LOC_Os02g05480	Yes	No	No	No	No	No	No	No	No	No	No	No	K04371 ERK1_2	extracellular signal-regulated kinase 1/2 [EC:2.7.11.24]
LOC_Os03g17700	No	No	No	Yes	No	No	No	No	No	No	No	No	K04371 ERK1_2	extracellular signal-regulated kinase 1/2 [EC:2.7.11.24]
LOC_Os06g48590	No	Yes	No	No	No	No	No	Yes	No	No	No	No	K04371 ERK1_2	extracellular signal-regulated kinase 1/2 [EC:2.7.11.24]
LOC_Os07g43240	No	No	Yes	No	No	No	No	No	No	No	No	No	K03094 SKP1, CBF3D	S-phase kinase-associated protein 1
LOC_Os03g62730	No	Yes	No	No	No	No	No	Yes	No	No	No	No	K11584 PPP2R5	protein phosphatase 2 (formerly 2A), regulatory subunit B'
04210 Apoptosis [PATH:ko04210]	No	No	No	No	No	No	No	No	No	No	No	No
04115 p53 signaling pathway [PATH:ko04115]	No	No	No	No	No	No	No	No	No	No	No	No
LOC_Os03g24040	No	No	Yes	No	No	No	No	No	Yes	No	No	No	K04506 SIAH1	E3 ubiquitin-protein ligase SIAH1 [EC:6.3.2.19]
LOC_Os07g46560	Yes	No	No	No	No	No	No	No	No	No	No	No	K04506 SIAH1	E3 ubiquitin-protein ligase SIAH1 [EC:6.3.2.19]
LOC_Os02g02380	No	No	No	Yes	No	No	No	No	No	Yes	No	No	K10143 RFWD2, COP1	E3 ubiquitin-protein ligase RFWD2 [EC:6.3.2.19]
LOC_Os01g52110	No	No	Yes	No	No	No	No	No	Yes	No	No	No	K10144 RCHY1, PIRH2	RING finger and CHY zinc finger domain-containing protein 1 [EC:6.3.2.19]
LOC_Os03g05270	No	No	Yes	No	No	No	No	No	No	No	No	No	K10144 RCHY1, PIRH2	RING finger and CHY zinc finger domain-containing protein 1 [EC:6.3.2.19]
LOC_Os03g22680	No	No	Yes	No	No	No	No	No	Yes	No	No	No	K10144 RCHY1, PIRH2	RING finger and CHY zinc finger domain-containing protein 1 [EC:6.3.2.19]
LOC_Os10g31850	Yes	No	No	No	No	No	Yes	No	No	No	No	No	K10144 RCHY1, PIRH2	RING finger and CHY zinc finger domain-containing protein 1 [EC:6.3.2.19]
Cell communication	No	No	No	No	No	No	No	No	No	No	No	No
04510 Focal adhesion [PATH:ko04510]	No	No	No	No	No	No	No	No	No	No	No	No
LOC_Os02g50860	No	Yes	No	No	No	No	No	No	No	No	No	No	K04392 RAC1	Ras-related C3 botulinum toxin substrate 1
LOC_Os02g05480	Yes	No	No	No	No	No	No	No	No	No	No	No	K04371 ERK1_2	extracellular signal-regulated kinase 1/2 [EC:2.7.11.24]
LOC_Os03g17700	No	No	No	Yes	No	No	No	No	No	No	No	No	K04371 ERK1_2	extracellular signal-regulated kinase 1/2 [EC:2.7.11.24]
LOC_Os06g48590	No	Yes	No	No	No	No	No	Yes	No	No	No	No	K04371 ERK1_2	extracellular signal-regulated kinase 1/2 [EC:2.7.11.24]
04520 Adherens junction [PATH:ko04520]	No	No	No	No	No	No	No	No	No	No	No	No
LOC_Os02g50860	No	Yes	No	No	No	No	No	No	No	No	No	No	K04392 RAC1	Ras-related C3 botulinum toxin substrate 1
LOC_Os02g05480	Yes	No	No	No	No	No	No	No	No	No	No	No	K04371 ERK1_2	extracellular signal-regulated kinase 1/2 [EC:2.7.11.24]
LOC_Os03g17700	No	No	No	Yes	No	No	No	No	No	No	No	No	K04371 ERK1_2	extracellular signal-regulated kinase 1/2 [EC:2.7.11.24]
LOC_Os06g48590	No	Yes	No	No	No	No	No	Yes	No	No	No	No	K04371 ERK1_2	extracellular signal-regulated kinase 1/2 [EC:2.7.11.24]
04530 Tight junction [PATH:ko04530]	No	No	No	No	No	No	No	No	No	No	No	No
04540 Gap junction [PATH:ko04540]	No	No	No	No	No	No	No	No	No	No	No	No
LOC_Os02g05480	Yes	No	No	No	No	No	No	No	No	No	No	No	K04371 ERK1_2	extracellular signal-regulated kinase 1/2 [EC:2.7.11.24]
LOC_Os03g17700	No	No	No	Yes	No	No	No	No	No	No	No	No	K04371 ERK1_2	extracellular signal-regulated kinase 1/2 [EC:2.7.11.24]
LOC_Os06g48590	No	Yes	No	No	No	No	No	Yes	No	No	No	No	K04371 ERK1_2	extracellular signal-regulated kinase 1/2 [EC:2.7.11.24]
LOC_Os01g18050	No	No	No	Yes	No	No	No	No	No	Yes	No	No	K07375 TUBB	tubulin beta
LOC_Os01g59150	No	Yes	No	No	No	No	No	Yes	No	No	No	No	K07375 TUBB	tubulin beta
LOC_Os06g45990	Yes	No	No	No	No	No	Yes	No	No	No	No	No	K07375 TUBB	tubulin beta
Organismal Systems	No	No	No	No	No	No	No	No	No	No	No	No
Immune system	No	No	No	No	No	No	No	No	No	No	No	No
04640 Hematopoietic cell lineage [PATH:ko04640]	No	No	No	No	No	No	No	No	No	No	No	No
04610 Complement and coagulation cascades [PATH:ko04610]	No	No	No	No	No	No	No	No	No	No	No	No
04620 Toll-like receptor signaling pathway [PATH:ko04620]	No	No	No	No	No	No	No	No	No	No	No	No
LOC_Os06g20430	No	No	Yes	No	No	No	No	No	No	No	No	No	K05399 LBP	lipopolysaccharide-binding protein
LOC_Os02g50860	No	Yes	No	No	No	No	No	No	No	No	No	No	K04392 RAC1	Ras-related C3 botulinum toxin substrate 1
LOC_Os02g05480	Yes	No	No	No	No	No	No	No	No	No	No	No	K04371 ERK1_2	extracellular signal-regulated kinase 1/2 [EC:2.7.11.24]
LOC_Os03g17700	No	No	No	Yes	No	No	No	No	No	No	No	No	K04371 ERK1_2	extracellular signal-regulated kinase 1/2 [EC:2.7.11.24]
LOC_Os06g48590	No	Yes	No	No	No	No	No	Yes	No	No	No	No	K04371 ERK1_2	extracellular signal-regulated kinase 1/2 [EC:2.7.11.24]
04621 NoD-like receptor signaling pathway [PATH:ko04621]	No	No	No	No	No	No	No	No	No	No	No	No
LOC_Os02g05480	Yes	No	No	No	No	No	No	No	No	No	No	No	K04371 ERK1_2	extracellular signal-regulated kinase 1/2 [EC:2.7.11.24]
LOC_Os03g17700	No	No	No	Yes	No	No	No	No	No	No	No	No	K04371 ERK1_2	extracellular signal-regulated kinase 1/2 [EC:2.7.11.24]
LOC_Os06g48590	No	Yes	No	No	No	No	No	Yes	No	No	No	No	K04371 ERK1_2	extracellular signal-regulated kinase 1/2 [EC:2.7.11.24]
LOC_Os04g01740	No	No	Yes	No	No	No	No	No	Yes	No	No	No	K04079 htpG, HSP90A	molecular chaperone HtpG
LOC_Os08g39140	No	Yes	No	No	No	No	No	Yes	No	No	No	No	K04079 htpG, HSP90A	molecular chaperone HtpG
LOC_Os06g50300	No	Yes	No	No	No	No	No	Yes	No	No	No	No	K09487 HSP90B, TRA1	heat shock protein 90kDa beta
04622 RIG-I-like receptor signaling pathway [PATH:ko04622]	No	No	No	No	No	No	No	No	No	No	No	No
LOC_Os03g59050	Yes	No	No	No	No	No	Yes	No	No	No	No	No	K11594 DDX3X, bel	ATP-dependent RNA helicase [EC:3.6.4.13]
04623 Cytosolic DNA-sensing pathway [PATH:ko04623]	No	No	No	No	No	No	No	No	No	No	No	No
LOC_Os01g34614	No	Yes	No	No	No	No	No	Yes	No	No	No	No	K03009 RPB12, POLR2K	DNA-directed RNA polymerases I, II, and III subunit RPABC4
04650 Natural killer cell mediated cytotoxicity [PATH:ko04650]	No	No	No	No	No	No	No	No	No	No	No	No
LOC_Os02g50860	No	Yes	No	No	No	No	No	No	No	No	No	No	K04392 RAC1	Ras-related C3 botulinum toxin substrate 1
LOC_Os02g05480	Yes	No	No	No	No	No	No	No	No	No	No	No	K04371 ERK1_2	extracellular signal-regulated kinase 1/2 [EC:2.7.11.24]
LOC_Os03g17700	No	No	No	Yes	No	No	No	No	No	No	No	No	K04371 ERK1_2	extracellular signal-regulated kinase 1/2 [EC:2.7.11.24]
LOC_Os06g48590	No	Yes	No	No	No	No	No	Yes	No	No	No	No	K04371 ERK1_2	extracellular signal-regulated kinase 1/2 [EC:2.7.11.24]
04612 Antigen processing and presentation [PATH:ko04612]	No	No	No	No	No	No	No	No	No	No	No	No
LOC_Os01g62290	No	Yes	No	No	No	No	No	Yes	No	No	No	No	K03283 HSPA1_8	heat shock 70kDa protein 1/8
LOC_Os03g16860	No	Yes	No	No	No	No	No	No	No	No	No	No	K03283 HSPA1_8	heat shock 70kDa protein 1/8
LOC_Os03g16880	Yes	No	No	No	No	No	Yes	No	No	No	No	No	K03283 HSPA1_8	heat shock 70kDa protein 1/8
LOC_Os03g16920	No	No	Yes	No	No	No	No	No	No	No	No	No	K03283 HSPA1_8	heat shock 70kDa protein 1/8
LOC_Os05g38530	No	Yes	No	No	No	No	No	Yes	No	No	No	No	K03283 HSPA1_8	heat shock 70kDa protein 1/8
LOC_Os04g01740	No	No	Yes	No	No	No	No	No	Yes	No	No	No	K04079 htpG, HSP90A	molecular chaperone HtpG
LOC_Os08g39140	No	Yes	No	No	No	No	No	Yes	No	No	No	No	K04079 htpG, HSP90A	molecular chaperone HtpG
LOC_Os03g61670	No	No	Yes	No	No	No	No	No	No	No	No	No	K08057 CALR	calreticulin
LOC_Os01g37910	No	No	Yes	No	No	No	No	No	No	No	No	No	K01369 LGMN	legumain [EC:3.4.22.34]
LOC_Os05g51570	No	No	Yes	No	No	No	No	No	Yes	No	No	No	K01369 LGMN	legumain [EC:3.4.22.34]
LOC_Os03g07880	No	Yes	No	No	No	No	No	Yes	No	No	No	No	K08064 NFYA	nuclear transcription factor Y, alpha
LOC_Os08g09690	No	Yes	No	No	No	No	No	Yes	No	No	No	No	K08064 NFYA	nuclear transcription factor Y, alpha
04660 T cell receptor signaling pathway [PATH:ko04660]	No	No	No	No	No	No	No	No	No	No	No	No
LOC_Os02g05480	Yes	No	No	No	No	No	No	No	No	No	No	No	K04371 ERK1_2	extracellular signal-regulated kinase 1/2 [EC:2.7.11.24]
LOC_Os03g17700	No	No	No	Yes	No	No	No	No	No	No	No	No	K04371 ERK1_2	extracellular signal-regulated kinase 1/2 [EC:2.7.11.24]
LOC_Os06g48590	No	Yes	No	No	No	No	No	Yes	No	No	No	No	K04371 ERK1_2	extracellular signal-regulated kinase 1/2 [EC:2.7.11.24]
04662 B cell receptor signaling pathway [PATH:ko04662]	No	No	No	No	No	No	No	No	No	No	No	No
LOC_Os02g50860	No	Yes	No	No	No	No	No	No	No	No	No	No	K04392 RAC1	Ras-related C3 botulinum toxin substrate 1
LOC_Os02g05480	Yes	No	No	No	No	No	No	No	No	No	No	No	K04371 ERK1_2	extracellular signal-regulated kinase 1/2 [EC:2.7.11.24]
LOC_Os03g17700	No	No	No	Yes	No	No	No	No	No	No	No	No	K04371 ERK1_2	extracellular signal-regulated kinase 1/2 [EC:2.7.11.24]
LOC_Os06g48590	No	Yes	No	No	No	No	No	Yes	No	No	No	No	K04371 ERK1_2	extracellular signal-regulated kinase 1/2 [EC:2.7.11.24]
04664 Fc epsilon RI signaling pathway [PATH:ko04664]	No	No	No	No	No	No	No	No	No	No	No	No
LOC_Os02g50860	No	Yes	No	No	No	No	No	No	No	No	No	No	K04392 RAC1	Ras-related C3 botulinum toxin substrate 1
LOC_Os02g05480	Yes	No	No	No	No	No	No	No	No	No	No	No	K04371 ERK1_2	extracellular signal-regulated kinase 1/2 [EC:2.7.11.24]
LOC_Os03g17700	No	No	No	Yes	No	No	No	No	No	No	No	No	K04371 ERK1_2	extracellular signal-regulated kinase 1/2 [EC:2.7.11.24]
LOC_Os06g48590	No	Yes	No	No	No	No	No	Yes	No	No	No	No	K04371 ERK1_2	extracellular signal-regulated kinase 1/2 [EC:2.7.11.24]
04666 Fc gamma R-mediated phagocytosis [PATH:ko04666]	No	No	No	No	No	No	No	No	No	No	No	No
LOC_Os03g21620	No	No	Yes	No	No	No	No	No	No	No	No	No	K04688 RPS6KB	p70 ribosomal S6 kinase [EC:2.7.11.1]
LOC_Os02g05480	Yes	No	No	No	No	No	No	No	No	No	No	No	K04371 ERK1_2	extracellular signal-regulated kinase 1/2 [EC:2.7.11.24]
LOC_Os03g17700	No	No	No	Yes	No	No	No	No	No	No	No	No	K04371 ERK1_2	extracellular signal-regulated kinase 1/2 [EC:2.7.11.24]
LOC_Os06g48590	No	Yes	No	No	No	No	No	Yes	No	No	No	No	K04371 ERK1_2	extracellular signal-regulated kinase 1/2 [EC:2.7.11.24]
LOC_Os05g07880	No	No	No	Yes	No	No	No	No	No	No	No	No	K01115 PLD1_2	phospholipase D1/2 [EC:3.1.4.4]
LOC_Os06g40180	No	No	No	Yes	No	No	No	No	No	No	No	No	K01115 PLD1_2	phospholipase D1/2 [EC:3.1.4.4]
LOC_Os02g50860	No	Yes	No	No	No	No	No	No	No	No	No	No	K04392 RAC1	Ras-related C3 botulinum toxin substrate 1
LOC_Os03g13950	No	No	Yes	No	No	No	No	No	No	No	No	No	K05765 CFL	cofilin
LOC_Os03g60580	No	No	Yes	No	No	No	No	No	Yes	No	No	No	K05765 CFL	cofilin
04670 Leukocyte transendothelial migration [PATH:ko04670]	No	No	No	No	No	No	No	No	No	No	No	No
LOC_Os02g50860	No	Yes	No	No	No	No	No	No	No	No	No	No	K04392 RAC1	Ras-related C3 botulinum toxin substrate 1
04672 Intestinal immune network for IgA production [PATH:ko04672]	No	No	No	No	No	No	No	No	No	No	No	No
04062 Chemokine signaling pathway [PATH:ko04062]	No	No	No	No	No	No	No	No	No	No	No	No
LOC_Os02g05480	Yes	No	No	No	No	No	No	No	No	No	No	No	K04371 ERK1_2	extracellular signal-regulated kinase 1/2 [EC:2.7.11.24]
LOC_Os03g17700	No	No	No	Yes	No	No	No	No	No	No	No	No	K04371 ERK1_2	extracellular signal-regulated kinase 1/2 [EC:2.7.11.24]
LOC_Os06g48590	No	Yes	No	No	No	No	No	Yes	No	No	No	No	K04371 ERK1_2	extracellular signal-regulated kinase 1/2 [EC:2.7.11.24]
LOC_Os02g50860	No	Yes	No	No	No	No	No	No	No	No	No	No	K04392 RAC1	Ras-related C3 botulinum toxin substrate 1
Endocrine system	No	No	No	No	No	No	No	No	No	No	No	No
04911 Insulin secretion [PATH:ko04911]	No	No	No	No	No	No	No	No	No	No	No	No
04910 Insulin signaling pathway [PATH:ko04910]	No	No	No	No	No	No	No	No	No	No	No	No
LOC_Os05g09500	No	No	Yes	No	No	No	No	No	No	No	No	No	K00844 HK	hexokinase [EC:2.7.1.1]
LOC_Os03g21620	No	No	Yes	No	No	No	No	No	No	No	No	No	K04688 RPS6KB	p70 ribosomal S6 kinase [EC:2.7.11.1]
LOC_Os02g05480	Yes	No	No	No	No	No	No	No	No	No	No	No	K04371 ERK1_2	extracellular signal-regulated kinase 1/2 [EC:2.7.11.24]
LOC_Os03g17700	No	No	No	Yes	No	No	No	No	No	No	No	No	K04371 ERK1_2	extracellular signal-regulated kinase 1/2 [EC:2.7.11.24]
LOC_Os06g48590	No	Yes	No	No	No	No	No	Yes	No	No	No	No	K04371 ERK1_2	extracellular signal-regulated kinase 1/2 [EC:2.7.11.24]
04920 Adipocytokine signaling pathway [PATH:ko04920]	No	No	No	No	No	No	No	No	No	No	No	No
LOC_Os01g48910	No	No	Yes	No	No	No	No	No	No	No	No	No	K01897 ACSL, fadD	long-chain acyl-CoA synthetase [EC:6.2.1.3]
LOC_Os05g04170	No	No	No	No	No	Yes	No	Yes	No	No	No	No	K01897 ACSL, fadD	long-chain acyl-CoA synthetase [EC:6.2.1.3]
LOC_Os05g25310	No	Yes	No	No	No	No	No	Yes	No	No	No	No	K01897 ACSL, fadD	long-chain acyl-CoA synthetase [EC:6.2.1.3]
LOC_Os12g04990	No	No	Yes	No	No	No	No	No	No	No	No	No	K01897 ACSL, fadD	long-chain acyl-CoA synthetase [EC:6.2.1.3]
03320 PPAR signaling pathway [PATH:ko03320]	No	No	No	No	No	No	No	No	No	No	No	No
LOC_Os01g48910	No	No	Yes	No	No	No	No	No	No	No	No	No	K01897 ACSL, fadD	long-chain acyl-CoA synthetase [EC:6.2.1.3]
LOC_Os05g04170	No	No	No	No	No	Yes	No	Yes	No	No	No	No	K01897 ACSL, fadD	long-chain acyl-CoA synthetase [EC:6.2.1.3]
LOC_Os05g25310	No	Yes	No	No	No	No	No	Yes	No	No	No	No	K01897 ACSL, fadD	long-chain acyl-CoA synthetase [EC:6.2.1.3]
LOC_Os12g04990	No	No	Yes	No	No	No	No	No	No	No	No	No	K01897 ACSL, fadD	long-chain acyl-CoA synthetase [EC:6.2.1.3]
LOC_Os02g57260	No	No	Yes	No	No	No	No	No	No	No	No	No	K07513 ACAA1	acetyl-CoA acyltransferase 1 [EC:2.3.1.16]
LOC_Os06g24704	No	No	Yes	No	No	No	No	No	No	No	No	No	K00232 E1.3.3.6, ACOX1, ACOX3	acyl-CoA oxidase [EC:1.3.3.6]
LOC_Os11g39220	No	No	Yes	No	No	No	No	No	Yes	No	No	No	K00232 E1.3.3.6, ACOX1, ACOX3	acyl-CoA oxidase [EC:1.3.3.6]
LOC_Os04g53620	Yes	No	No	No	No	No	Yes	No	No	No	No	No	K08770 UBC	ubiquitin C
LOC_Os04g55410	No	No	Yes	No	No	No	No	No	No	No	No	No	K00864 E2.7.1.30, glpK	glycerol kinase [EC:2.7.1.30]
04912 GnRH signaling pathway [PATH:ko04912]	No	No	No	No	No	No	No	No	No	No	No	No
LOC_Os05g07880	No	No	No	Yes	No	No	No	No	No	No	No	No	K01115 PLD1_2	phospholipase D1/2 [EC:3.1.4.4]
LOC_Os06g40180	No	No	No	Yes	No	No	No	No	No	No	No	No	K01115 PLD1_2	phospholipase D1/2 [EC:3.1.4.4]
LOC_Os02g05480	Yes	No	No	No	No	No	No	No	No	No	No	No	K04371 ERK1_2	extracellular signal-regulated kinase 1/2 [EC:2.7.11.24]
LOC_Os03g17700	No	No	No	Yes	No	No	No	No	No	No	No	No	K04371 ERK1_2	extracellular signal-regulated kinase 1/2 [EC:2.7.11.24]
LOC_Os06g48590	No	Yes	No	No	No	No	No	Yes	No	No	No	No	K04371 ERK1_2	extracellular signal-regulated kinase 1/2 [EC:2.7.11.24]
04913 Ovarian Steroidogenesis [PATH:ko04913]	No	No	No	No	No	No	No	No	No	No	No	No
04915 Estrogen signaling pathway [PATH:ko04915]	No	No	No	No	No	No	No	No	No	No	No	No
LOC_Os04g01740	No	No	Yes	No	No	No	No	No	Yes	No	No	No	K04079 htpG, HSP90A	molecular chaperone HtpG
LOC_Os08g39140	No	Yes	No	No	No	No	No	Yes	No	No	No	No	K04079 htpG, HSP90A	molecular chaperone HtpG
LOC_Os06g50300	No	Yes	No	No	No	No	No	Yes	No	No	No	No	K09487 HSP90B, TRA1	heat shock protein 90kDa beta
LOC_Os01g62290	No	Yes	No	No	No	No	No	Yes	No	No	No	No	K03283 HSPA1_8	heat shock 70kDa protein 1/8
LOC_Os03g16860	No	Yes	No	No	No	No	No	No	No	No	No	No	K03283 HSPA1_8	heat shock 70kDa protein 1/8
LOC_Os03g16880	Yes	No	No	No	No	No	Yes	No	No	No	No	No	K03283 HSPA1_8	heat shock 70kDa protein 1/8
LOC_Os03g16920	No	No	Yes	No	No	No	No	No	No	No	No	No	K03283 HSPA1_8	heat shock 70kDa protein 1/8
LOC_Os05g38530	No	Yes	No	No	No	No	No	Yes	No	No	No	No	K03283 HSPA1_8	heat shock 70kDa protein 1/8
LOC_Os02g05480	Yes	No	No	No	No	No	No	No	No	No	No	No	K04371 ERK1_2	extracellular signal-regulated kinase 1/2 [EC:2.7.11.24]
LOC_Os03g17700	No	No	No	Yes	No	No	No	No	No	No	No	No	K04371 ERK1_2	extracellular signal-regulated kinase 1/2 [EC:2.7.11.24]
LOC_Os06g48590	No	Yes	No	No	No	No	No	Yes	No	No	No	No	K04371 ERK1_2	extracellular signal-regulated kinase 1/2 [EC:2.7.11.24]
04914 Progesterone-mediated oocyte maturation [PATH:ko04914]	No	No	No	No	No	No	No	No	No	No	No	No
LOC_Os04g01740	No	No	Yes	No	No	No	No	No	Yes	No	No	No	K04079 htpG, HSP90A	molecular chaperone HtpG
LOC_Os08g39140	No	Yes	No	No	No	No	No	Yes	No	No	No	No	K04079 htpG, HSP90A	molecular chaperone HtpG
LOC_Os02g05480	Yes	No	No	No	No	No	No	No	No	No	No	No	K04371 ERK1_2	extracellular signal-regulated kinase 1/2 [EC:2.7.11.24]
LOC_Os03g17700	No	No	No	Yes	No	No	No	No	No	No	No	No	K04371 ERK1_2	extracellular signal-regulated kinase 1/2 [EC:2.7.11.24]
LOC_Os06g48590	No	Yes	No	No	No	No	No	Yes	No	No	No	No	K04371 ERK1_2	extracellular signal-regulated kinase 1/2 [EC:2.7.11.24]
04917 Prolactin signaling pathway [PATH:ko04917]	No	No	No	No	No	No	No	No	No	No	No	No
LOC_Os02g05480	Yes	No	No	No	No	No	No	No	No	No	No	No	K04371 ERK1_2	extracellular signal-regulated kinase 1/2 [EC:2.7.11.24]
LOC_Os03g17700	No	No	No	Yes	No	No	No	No	No	No	No	No	K04371 ERK1_2	extracellular signal-regulated kinase 1/2 [EC:2.7.11.24]
LOC_Os06g48590	No	Yes	No	No	No	No	No	Yes	No	No	No	No	K04371 ERK1_2	extracellular signal-regulated kinase 1/2 [EC:2.7.11.24]
04916 MelaNogenesis [PATH:ko04916]	No	No	No	No	No	No	No	No	No	No	No	No
LOC_Os02g05480	Yes	No	No	No	No	No	No	No	No	No	No	No	K04371 ERK1_2	extracellular signal-regulated kinase 1/2 [EC:2.7.11.24]
LOC_Os03g17700	No	No	No	Yes	No	No	No	No	No	No	No	No	K04371 ERK1_2	extracellular signal-regulated kinase 1/2 [EC:2.7.11.24]
LOC_Os06g48590	No	Yes	No	No	No	No	No	Yes	No	No	No	No	K04371 ERK1_2	extracellular signal-regulated kinase 1/2 [EC:2.7.11.24]
04614 Renin-angiotensin system [PATH:ko04614]	No	No	No	No	No	No	No	No	No	No	No	No
Circulatory system	No	No	No	No	No	No	No	No	No	No	No	No
04260 Cardiac muscle contraction [PATH:ko04260]	No	No	No	No	No	No	No	No	No	No	No	No
LOC_Os12g39930	Yes	No	No	No	No	No	No	No	No	No	No	No	K02262 COX3	cytochrome c oxidase subunit 3
LOC_Os12g33946	Yes	No	No	No	No	No	No	No	No	No	No	No	K02256 COX1	cytochrome c oxidase subunit 1 [EC:1.9.3.1]
LOC_Os01g67364	Yes	No	No	No	No	No	No	No	No	No	No	No	K02261 COX2	cytochrome c oxidase subunit 2
04270 Vascular smooth muscle contraction [PATH:ko04270]	No	No	No	No	No	No	No	No	No	No	No	No
LOC_Os02g05480	Yes	No	No	No	No	No	No	No	No	No	No	No	K04371 ERK1_2	extracellular signal-regulated kinase 1/2 [EC:2.7.11.24]
LOC_Os03g17700	No	No	No	Yes	No	No	No	No	No	No	No	No	K04371 ERK1_2	extracellular signal-regulated kinase 1/2 [EC:2.7.11.24]
LOC_Os06g48590	No	Yes	No	No	No	No	No	Yes	No	No	No	No	K04371 ERK1_2	extracellular signal-regulated kinase 1/2 [EC:2.7.11.24]
Digestive system	No	No	No	No	No	No	No	No	No	No	No	No
04970 Salivary secretion [PATH:ko04970]	No	No	No	No	No	No	No	No	No	No	No	No
04971 Gastric acid secretion [PATH:ko04971]	No	No	No	No	No	No	No	No	No	No	No	No
04972 Pancreatic secretion [PATH:ko04972]	No	No	No	No	No	No	No	No	No	No	No	No
LOC_Os02g50860	No	Yes	No	No	No	No	No	No	No	No	No	No	K04392 RAC1	Ras-related C3 botulinum toxin substrate 1
04976 Bile secretion [PATH:ko04976]	No	No	No	No	No	No	No	No	No	No	No	No
LOC_Os01g50100	Yes	No	No	No	No	No	Yes	No	No	No	No	No	K05658 ABCB1	ATP-binding cassette, subfamily B (MDR/TAP), member 1
LOC_Os02g09720	No	No	Yes	No	No	No	No	No	No	No	No	No	K05658 ABCB1	ATP-binding cassette, subfamily B (MDR/TAP), member 1
04973 Carbohydrate digestion and absorption [PATH:ko04973]	No	No	No	No	No	No	No	No	No	No	No	No
LOC_Os06g49970	No	No	Yes	No	No	No	No	No	Yes	No	No	No	K01176 E3.2.1.1, amyA, malS	alpha-amylase [EC:3.2.1.1]
LOC_Os05g09500	No	No	Yes	No	No	No	No	No	No	No	No	No	K00844 HK	hexokinase [EC:2.7.1.1]
04974 Protein digestion and absorption [PATH:ko04974]	No	No	No	No	No	No	No	No	No	No	No	No
LOC_Os01g56150	No	Yes	No	No	No	No	No	Yes	No	No	No	No	K01285 PRCP	lysosomal Pro-X carboxypeptidase [EC:3.4.16.2]
04975 Fat digestion and absorption [PATH:ko04975]	No	No	No	No	No	No	No	No	No	No	No	No
04977 Vitamin digestion and absorption [PATH:ko04977]	No	No	No	No	No	No	No	No	No	No	No	No
04978 Mineral absorption [PATH:ko04978]	No	No	No	No	No	No	No	No	No	No	No	No
LOC_Os11g01530	No	No	No	No	Yes	No	Yes	No	No	No	No	No	K00522 FTH1	ferritin heavy chain [EC:1.16.3.1]
Excretory system	No	No	No	No	No	No	No	No	No	No	No	No
04962 Vasopressin-regulated water reabsorption [PATH:ko04962]	No	No	No	No	No	No	No	No	No	No	No	No
LOC_Os02g16909	No	No	Yes	No	No	No	No	No	No	No	No	No	K10418 DYNLL	dynein light chain LC8-type
04960 Aldosterone-regulated sodium reabsorption [PATH:ko04960]	No	No	No	No	No	No	No	No	No	No	No	No
LOC_Os02g05480	Yes	No	No	No	No	No	No	No	No	No	No	No	K04371 ERK1_2	extracellular signal-regulated kinase 1/2 [EC:2.7.11.24]
LOC_Os03g17700	No	No	No	Yes	No	No	No	No	No	No	No	No	K04371 ERK1_2	extracellular signal-regulated kinase 1/2 [EC:2.7.11.24]
LOC_Os06g48590	No	Yes	No	No	No	No	No	Yes	No	No	No	No	K04371 ERK1_2	extracellular signal-regulated kinase 1/2 [EC:2.7.11.24]
04961 Endocrine and other factor-regulated calcium reabsorption [PATH:ko04961]	No	No	No	No	No	No	No	No	No	No	No	No
04964 Proximal tubule bicarbonate reclamation [PATH:ko04964]	No	No	No	No	No	No	No	No	No	No	No	No
LOC_Os02g43470	No	No	Yes	No	No	No	No	No	No	No	No	No	K00261 E1.4.1.3	glutamate dehydrogenase (NAD(P)+) [EC:1.4.1.3]
LOC_Os04g45970	No	No	Yes	No	No	No	No	No	No	No	No	No	K00261 E1.4.1.3	glutamate dehydrogenase (NAD(P)+) [EC:1.4.1.3]
04966 Collecting duct acid secretion [PATH:ko04966]	No	No	No	No	No	No	No	No	No	No	No	No
LOC_Os01g51380	No	No	Yes	No	No	No	No	No	No	No	No	No	K02147 ATPeVB, ATP6B1	V-type H+-transporting ATPase subunit B [EC:3.6.3.14]
LOC_Os04g51270	No	No	Yes	No	No	No	No	No	No	No	No	No	K02152 ATPeVG, ATP6G1	V-type H+-transporting ATPase subunit G [EC:3.6.3.14]
Nervous system	No	No	No	No	No	No	No	No	No	No	No	No
04724 Glutamatergic synapse [PATH:ko04724]	No	No	No	No	No	No	No	No	No	No	No	No
LOC_Os05g07880	No	No	No	Yes	No	No	No	No	No	No	No	No	K01115 PLD1_2	phospholipase D1/2 [EC:3.1.4.4]
LOC_Os06g40180	No	No	No	Yes	No	No	No	No	No	No	No	No	K01115 PLD1_2	phospholipase D1/2 [EC:3.1.4.4]
LOC_Os02g05480	Yes	No	No	No	No	No	No	No	No	No	No	No	K04371 ERK1_2	extracellular signal-regulated kinase 1/2 [EC:2.7.11.24]
LOC_Os03g17700	No	No	No	Yes	No	No	No	No	No	No	No	No	K04371 ERK1_2	extracellular signal-regulated kinase 1/2 [EC:2.7.11.24]
LOC_Os06g48590	No	Yes	No	No	No	No	No	Yes	No	No	No	No	K04371 ERK1_2	extracellular signal-regulated kinase 1/2 [EC:2.7.11.24]
04727 GABAergic synapse [PATH:ko04727]	No	No	No	No	No	No	No	No	No	No	No	No
LOC_Os03g51080	No	No	Yes	No	No	No	No	No	No	No	No	No	K01580 E4.1.1.15, gadB, gadA, GAD	glutamate decarboxylase [EC:4.1.1.15]
LOC_Os04g37500	No	No	Yes	No	No	No	No	No	No	No	No	No	K01580 E4.1.1.15, gadB, gadA, GAD	glutamate decarboxylase [EC:4.1.1.15]
LOC_Os08g36320	No	Yes	No	No	No	No	No	Yes	No	No	No	No	K01580 E4.1.1.15, gadB, gadA, GAD	glutamate decarboxylase [EC:4.1.1.15]
LOC_Os04g38680	No	Yes	Yes	No	No	No	No	Yes	No	No	No	No	K15015 SLC32A, VGAT	solute carrier family 32 (vesicular inhibitory amiNo acid transporter)
LOC_Os04g53240	No	No	Yes	No	No	No	No	No	No	No	No	No	K08341 GABARAP, ATG8, LC3	GABA(A) receptor-associated protein (autophagy-related protein 8)
04725 Cholinergic synapse [PATH:ko04725]	No	No	No	No	No	No	No	No	No	No	No	No
LOC_Os02g05480	Yes	No	No	No	No	No	No	No	No	No	No	No	K04371 ERK1_2	extracellular signal-regulated kinase 1/2 [EC:2.7.11.24]
LOC_Os03g17700	No	No	No	Yes	No	No	No	No	No	No	No	No	K04371 ERK1_2	extracellular signal-regulated kinase 1/2 [EC:2.7.11.24]
LOC_Os06g48590	No	Yes	No	No	No	No	No	Yes	No	No	No	No	K04371 ERK1_2	extracellular signal-regulated kinase 1/2 [EC:2.7.11.24]
04728 Dopaminergic synapse [PATH:ko04728]	No	No	No	No	No	No	No	No	No	No	No	No
LOC_Os03g62730	No	Yes	No	No	No	No	No	Yes	No	No	No	No	K11584 PPP2R5	protein phosphatase 2 (formerly 2A), regulatory subunit B'
04726 Serotonergic synapse [PATH:ko04726]	No	No	No	No	No	No	No	No	No	No	No	No
LOC_Os02g05480	Yes	No	No	No	No	No	No	No	No	No	No	No	K04371 ERK1_2	extracellular signal-regulated kinase 1/2 [EC:2.7.11.24]
LOC_Os03g17700	No	No	No	Yes	No	No	No	No	No	No	No	No	K04371 ERK1_2	extracellular signal-regulated kinase 1/2 [EC:2.7.11.24]
LOC_Os06g48590	No	Yes	No	No	No	No	No	Yes	No	No	No	No	K04371 ERK1_2	extracellular signal-regulated kinase 1/2 [EC:2.7.11.24]
04720 Long-term potentiation [PATH:ko04720]	No	No	No	No	No	No	No	No	No	No	No	No
LOC_Os02g05480	Yes	No	No	No	No	No	No	No	No	No	No	No	K04371 ERK1_2	extracellular signal-regulated kinase 1/2 [EC:2.7.11.24]
LOC_Os03g17700	No	No	No	Yes	No	No	No	No	No	No	No	No	K04371 ERK1_2	extracellular signal-regulated kinase 1/2 [EC:2.7.11.24]
LOC_Os06g48590	No	Yes	No	No	No	No	No	Yes	No	No	No	No	K04371 ERK1_2	extracellular signal-regulated kinase 1/2 [EC:2.7.11.24]
04730 Long-term depression [PATH:ko04730]	No	No	No	No	No	No	No	No	No	No	No	No
LOC_Os02g05480	Yes	No	No	No	No	No	No	No	No	No	No	No	K04371 ERK1_2	extracellular signal-regulated kinase 1/2 [EC:2.7.11.24]
LOC_Os03g17700	No	No	No	Yes	No	No	No	No	No	No	No	No	K04371 ERK1_2	extracellular signal-regulated kinase 1/2 [EC:2.7.11.24]
LOC_Os06g48590	No	Yes	No	No	No	No	No	Yes	No	No	No	No	K04371 ERK1_2	extracellular signal-regulated kinase 1/2 [EC:2.7.11.24]
04723 Retrograde endocannabiNoid signaling [PATH:ko04723]	No	No	No	No	No	No	No	No	No	No	No	No
LOC_Os02g05480	Yes	No	No	No	No	No	No	No	No	No	No	No	K04371 ERK1_2	extracellular signal-regulated kinase 1/2 [EC:2.7.11.24]
LOC_Os03g17700	No	No	No	Yes	No	No	No	No	No	No	No	No	K04371 ERK1_2	extracellular signal-regulated kinase 1/2 [EC:2.7.11.24]
LOC_Os06g48590	No	Yes	No	No	No	No	No	Yes	No	No	No	No	K04371 ERK1_2	extracellular signal-regulated kinase 1/2 [EC:2.7.11.24]
LOC_Os04g38680	No	Yes	Yes	No	No	No	No	Yes	No	No	No	No	K15015 SLC32A, VGAT	solute carrier family 32 (vesicular inhibitory amiNo acid transporter)
04721 Synaptic vesicle cycle [PATH:ko04721]	No	No	No	No	No	No	No	No	No	No	No	No
LOC_Os04g38680	No	Yes	Yes	No	No	No	No	Yes	No	No	No	No	K15015 SLC32A, VGAT	solute carrier family 32 (vesicular inhibitory amiNo acid transporter)
LOC_Os03g57310	No	Yes	No	No	No	No	No	No	No	No	No	No	K08486 STX1B_2_3	syntaxin 1B/2/3
LOC_Os06g04450	Yes	No	No	No	No	No	Yes	No	No	No	No	No	K15292 STXBP1, MUNC18-1	syntaxin-binding protein 1
LOC_Os01g51380	No	No	Yes	No	No	No	No	No	No	No	No	No	K02147 ATPeVB, ATP6B1	V-type H+-transporting ATPase subunit B [EC:3.6.3.14]
LOC_Os04g51270	No	No	Yes	No	No	No	No	No	No	No	No	No	K02152 ATPeVG, ATP6G1	V-type H+-transporting ATPase subunit G [EC:3.6.3.14]
04722 Neurotrophin signaling pathway [PATH:ko04722]	No	No	No	No	No	No	No	No	No	No	No	No
LOC_Os02g05480	Yes	No	No	No	No	No	No	No	No	No	No	No	K04371 ERK1_2	extracellular signal-regulated kinase 1/2 [EC:2.7.11.24]
LOC_Os03g17700	No	No	No	Yes	No	No	No	No	No	No	No	No	K04371 ERK1_2	extracellular signal-regulated kinase 1/2 [EC:2.7.11.24]
LOC_Os06g48590	No	Yes	No	No	No	No	No	Yes	No	No	No	No	K04371 ERK1_2	extracellular signal-regulated kinase 1/2 [EC:2.7.11.24]
LOC_Os02g50860	No	Yes	No	No	No	No	No	No	No	No	No	No	K04392 RAC1	Ras-related C3 botulinum toxin substrate 1
Sensory system	No	No	No	No	No	No	No	No	No	No	No	No
04744 Phototransduction [PATH:ko04744]	No	No	No	No	No	No	No	No	No	No	No	No
04745 Phototransduction - fly [PATH:ko04745]	No	No	No	No	No	No	No	No	No	No	No	No
04740 Olfactory transduction [PATH:ko04740]	No	No	No	No	No	No	No	No	No	No	No	No
04742 Taste transduction [PATH:ko04742]	No	No	No	No	No	No	No	No	No	No	No	No
Development	No	No	No	No	No	No	No	No	No	No	No	No
04320 Dorso-ventral axis formation [PATH:ko04320]	No	No	No	No	No	No	No	No	No	No	No	No
LOC_Os02g05480	Yes	No	No	No	No	No	No	No	No	No	No	No	K04371 ERK1_2	extracellular signal-regulated kinase 1/2 [EC:2.7.11.24]
LOC_Os03g17700	No	No	No	Yes	No	No	No	No	No	No	No	No	K04371 ERK1_2	extracellular signal-regulated kinase 1/2 [EC:2.7.11.24]
LOC_Os06g48590	No	Yes	No	No	No	No	No	Yes	No	No	No	No	K04371 ERK1_2	extracellular signal-regulated kinase 1/2 [EC:2.7.11.24]
04360 Axon guidance [PATH:ko04360]	No	No	No	No	No	No	No	No	No	No	No	No
LOC_Os02g50860	No	Yes	No	No	No	No	No	No	No	No	No	No	K04392 RAC1	Ras-related C3 botulinum toxin substrate 1
LOC_Os02g05480	Yes	No	No	No	No	No	No	No	No	No	No	No	K04371 ERK1_2	extracellular signal-regulated kinase 1/2 [EC:2.7.11.24]
LOC_Os03g17700	No	No	No	Yes	No	No	No	No	No	No	No	No	K04371 ERK1_2	extracellular signal-regulated kinase 1/2 [EC:2.7.11.24]
LOC_Os06g48590	No	Yes	No	No	No	No	No	Yes	No	No	No	No	K04371 ERK1_2	extracellular signal-regulated kinase 1/2 [EC:2.7.11.24]
LOC_Os03g13950	No	No	Yes	No	No	No	No	No	No	No	No	No	K05765 CFL	cofilin
LOC_Os03g60580	No	No	Yes	No	No	No	No	No	Yes	No	No	No	K05765 CFL	cofilin
04380 Osteoclast differentiation [PATH:ko04380]	No	No	No	No	No	No	No	No	No	No	No	No
LOC_Os02g05480	Yes	No	No	No	No	No	No	No	No	No	No	No	K04371 ERK1_2	extracellular signal-regulated kinase 1/2 [EC:2.7.11.24]
LOC_Os03g17700	No	No	No	Yes	No	No	No	No	No	No	No	No	K04371 ERK1_2	extracellular signal-regulated kinase 1/2 [EC:2.7.11.24]
LOC_Os06g48590	No	Yes	No	No	No	No	No	Yes	No	No	No	No	K04371 ERK1_2	extracellular signal-regulated kinase 1/2 [EC:2.7.11.24]
LOC_Os02g50860	No	Yes	No	No	No	No	No	No	No	No	No	No	K04392 RAC1	Ras-related C3 botulinum toxin substrate 1
Environmental adaptation	No	No	No	No	No	No	No	No	No	No	No	No
04710 Circadian rhythm [PATH:ko04710]	No	No	No	No	No	No	No	No	No	No	No	No
LOC_Os02g10990	Yes	No	No	No	No	No	No	No	No	No	No	No	K02295 CRY	cryptochrome
LOC_Os07g43240	No	No	Yes	No	No	No	No	No	No	No	No	No	K03094 SKP1, CBF3D	S-phase kinase-associated protein 1
04713 Circadian entrainment [PATH:ko04713]	No	No	No	No	No	No	No	No	No	No	No	No
LOC_Os02g05480	Yes	No	No	No	No	No	No	No	No	No	No	No	K04371 ERK1_2	extracellular signal-regulated kinase 1/2 [EC:2.7.11.24]
LOC_Os03g17700	No	No	No	Yes	No	No	No	No	No	No	No	No	K04371 ERK1_2	extracellular signal-regulated kinase 1/2 [EC:2.7.11.24]
LOC_Os06g48590	No	Yes	No	No	No	No	No	Yes	No	No	No	No	K04371 ERK1_2	extracellular signal-regulated kinase 1/2 [EC:2.7.11.24]
04711 Circadian rhythm - fly [PATH:ko04711]	No	No	No	No	No	No	No	No	No	No	No	No
04712 Circadian rhythm - plant [PATH:ko04712]	No	No	No	No	No	No	No	No	No	No	No	No
LOC_Os03g17570	No	No	No	No	Yes	No	Yes	No	Yes	No	Yes	Yes	K12129 PRR7	pseudo-response regulator 7
LOC_Os07g49460	No	No	No	No	Yes	No	Yes	No	Yes	No	Yes	Yes	K12129 PRR7	pseudo-response regulator 7
LOC_Os09g36220	Yes	No	No	No	No	No	Yes	No	No	No	No	No	K12130 PRR5	pseudo-response regulator 5
LOC_Os02g40510	Yes	No	No	No	No	No	Yes	No	No	No	No	No	K12127 TOC1, APRR1	pseudo-response regulator 1
LOC_Os01g08700	No	No	No	No	Yes	No	Yes	No	Yes	No	Yes	Yes	K12124 GI	GIGANTEA
LOC_Os11g32650	No	No	No	No	No	Yes	No	Yes	No	Yes	No	No	K00660 CHS	chalcone synthase [EC:2.3.1.74]
LOC_Os02g02380	No	No	No	Yes	No	No	No	No	No	Yes	No	No	K10143 RFWD2, COP1	E3 ubiquitin-protein ligase RFWD2 [EC:6.3.2.19]
LOC_Os11g34460	No	No	No	No	Yes	No	Yes	No	Yes	No	No	No	K12116 FKF1	flavin-binding kelch repeat F-box protein 1
04626 Plant-pathogen interaction [PATH:ko04626]	No	No	No	No	No	No	No	No	No	No	No	No
LOC_Os01g25820	No	Yes	No	No	No	No	No	Yes	No	No	No	No	K13447 RBOH	respiratory burst oxidase [EC:1.6.3.- 1.11.1.-]
LOC_Os05g42250	No	No	No	No	No	Yes	No	No	No	No	Yes	Yes	K05391 CNGF	cyclic nucleotide gated channel, other eukaryote
LOC_Os01g04330	No	No	No	Yes	No	No	No	No	No	No	No	No	K13448 CML	calcium-binding protein CML
LOC_Os01g32120	No	No	Yes	No	No	No	No	No	Yes	No	No	No	K13448 CML	calcium-binding protein CML
LOC_Os02g10470	No	Yes	Yes	No	No	No	No	Yes	No	No	No	No	K13448 CML	calcium-binding protein CML
LOC_Os03g55960	Yes	No	No	No	No	No	No	No	No	No	No	No	K13448 CML	calcium-binding protein CML
LOC_Os05g13580	No	Yes	No	No	No	No	No	No	No	No	No	No	K13448 CML	calcium-binding protein CML
LOC_Os05g31620	No	Yes	No	No	No	No	No	No	No	No	No	No	K13448 CML	calcium-binding protein CML
LOC_Os07g48340	No	No	No	No	No	Yes	No	No	No	No	No	No	K13448 CML	calcium-binding protein CML
LOC_Os02g54600	Yes	No	No	No	No	No	Yes	No	No	No	No	No	K13413 MKK4_5P	mitogen-activated protein kinase kinase 4/5, plant [EC:2.7.12.2]
LOC_Os01g61080	No	No	No	Yes	No	No	No	No	No	No	No	No	K13424 WRKY33	WRKY transcription factor 33
LOC_Os04g55410	No	No	Yes	No	No	No	No	No	No	No	No	No	K00864 E2.7.1.30, glpK	glycerol kinase [EC:2.7.1.30]
LOC_Os01g28450	No	No	No	No	Yes	No	No	No	No	No	No	No	K13449 PR1	pathogenesis-related protein 1
LOC_Os06g48520	No	No	Yes	No	No	No	No	No	No	No	No	No	K13457 RPM1, RPS3	disease resistance protein RPM1
LOC_Os07g08890	No	Yes	No	No	No	No	No	Yes	No	No	No	No	K13457 RPM1, RPS3	disease resistance protein RPM1
LOC_Os06g50300	No	Yes	No	No	No	No	No	Yes	No	No	No	No	K09487 HSP90B, TRA1	heat shock protein 90kDa beta
LOC_Os04g01740	No	No	Yes	No	No	No	No	No	Yes	No	No	No	K04079 htpG, HSP90A	molecular chaperone HtpG
LOC_Os08g39140	No	Yes	No	No	No	No	No	Yes	No	No	No	No	K04079 htpG, HSP90A	molecular chaperone HtpG
LOC_Os01g57870	No	Yes	No	No	No	No	No	No	No	No	No	No	K13459 RPS2	disease resistance protein RPS2
LOC_Os04g43440	No	No	No	Yes	No	No	No	No	No	No	No	No	K13459 RPS2	disease resistance protein RPS2
LOC_Os02g02040	No	No	No	No	No	Yes	No	Yes	No	Yes	No	No	K13430 PBS1	serine/threonine-protein kinase PBS1 [EC:2.7.11.1]
LOC_Os03g08320	No	No	No	No	Yes	No	Yes	No	No	No	No	No	K13464 JAZ	jasmonate ZIM domain-containing protein
LOC_Os03g08330	No	No	No	Yes	No	No	No	No	No	No	No	No	K13464 JAZ	jasmonate ZIM domain-containing protein
LOC_Os03g28940	Yes	No	No	No	No	No	Yes	No	No	No	No	No	K13464 JAZ	jasmonate ZIM domain-containing protein
LOC_Os09g26780	No	No	Yes	No	No	No	No	No	No	No	No	No	K13464 JAZ	jasmonate ZIM domain-containing protein
LOC_Os10g25230	No	No	No	Yes	No	No	No	No	No	No	No	No	K13464 JAZ	jasmonate ZIM domain-containing protein
LOC_Os10g25290	Yes	No	No	No	No	No	No	No	No	No	No	No	K13464 JAZ	jasmonate ZIM domain-containing protein
LOC_Os03g04110	Yes	No	No	No	No	No	Yes	No	No	No	No	No	K13473 CEBIP	chitin elicitor-binding protein
Human Diseases	No	No	No	No	No	No	No	No	No	No	No	No
Cancers	No	No	No	No	No	No	No	No	No	No	No	No
05200 Pathways in cancer [PATH:ko05200]	No	No	No	No	No	No	No	No	No	No	No	No
LOC_Os02g05480	Yes	No	No	No	No	No	No	No	No	No	No	No	K04371 ERK1_2	extracellular signal-regulated kinase 1/2 [EC:2.7.11.24]
LOC_Os03g17700	No	No	No	Yes	No	No	No	No	No	No	No	No	K04371 ERK1_2	extracellular signal-regulated kinase 1/2 [EC:2.7.11.24]
LOC_Os06g48590	No	Yes	No	No	No	No	No	Yes	No	No	No	No	K04371 ERK1_2	extracellular signal-regulated kinase 1/2 [EC:2.7.11.24]
LOC_Os02g50860	No	Yes	No	No	No	No	No	No	No	No	No	No	K04392 RAC1	Ras-related C3 botulinum toxin substrate 1
LOC_Os02g33430	Yes	No	No	No	No	No	No	No	No	No	No	No	K06620 E2F1_3	E2F transcription factor 1/3
LOC_Os01g65920	No	No	Yes	No	No	No	No	No	Yes	No	No	No	K03875 SKP2, FBXL1	F-box and leucine-rich repeat protein 1 (S-phase kinase-associated protein 2)
LOC_Os02g12380	No	No	Yes	No	No	No	No	No	No	No	No	No	K06067 HDAC1_2	histone deacetylase 1/2 [EC:3.5.1.98]
LOC_Os12g31370	Yes	No	No	No	No	No	No	No	No	No	No	No	K04482 RAD51	DNA repair protein RAD51
LOC_Os11g48030	No	Yes	No	No	No	No	No	Yes	No	No	No	No	K03872 TCEB1	transcription elongation factor B, polypeptide 1
LOC_Os04g01740	No	No	Yes	No	No	No	No	No	Yes	No	No	No	K04079 htpG, HSP90A	molecular chaperone HtpG
LOC_Os08g39140	No	Yes	No	No	No	No	No	Yes	No	No	No	No	K04079 htpG, HSP90A	molecular chaperone HtpG
LOC_Os06g50300	No	Yes	No	No	No	No	No	Yes	No	No	No	No	K09487 HSP90B, TRA1	heat shock protein 90kDa beta
05202 Transcriptional misregulation in cancers [PATH:ko05202]	No	No	No	No	No	No	No	No	No	No	No	No
LOC_Os02g12380	No	No	Yes	No	No	No	No	No	No	No	No	No	K06067 HDAC1_2	histone deacetylase 1/2 [EC:3.5.1.98]
LOC_Os06g06490	No	Yes	No	No	No	No	No	Yes	No	No	No	No	K11253 H3	histone H3
05205 Proteoglycans in cancer [PATH:ko05205]	No	No	No	No	No	No	No	No	No	No	No	No
LOC_Os02g05480	Yes	No	No	No	No	No	No	No	No	No	No	No	K04371 ERK1_2	extracellular signal-regulated kinase 1/2 [EC:2.7.11.24]
LOC_Os03g17700	No	No	No	Yes	No	No	No	No	No	No	No	No	K04371 ERK1_2	extracellular signal-regulated kinase 1/2 [EC:2.7.11.24]
LOC_Os06g48590	No	Yes	No	No	No	No	No	Yes	No	No	No	No	K04371 ERK1_2	extracellular signal-regulated kinase 1/2 [EC:2.7.11.24]
LOC_Os02g50860	No	Yes	No	No	No	No	No	No	No	No	No	No	K04392 RAC1	Ras-related C3 botulinum toxin substrate 1
LOC_Os03g21620	No	No	Yes	No	No	No	No	No	No	No	No	No	K04688 RPS6KB	p70 ribosomal S6 kinase [EC:2.7.11.1]
05204 Chemical carciNogenesis [PATH:ko05204]	No	No	No	No	No	No	No	No	No	No	No	No
LOC_Os01g27340	Yes	No	No	No	No	No	No	No	No	No	No	No	K00799 GST, gst	glutathione S-transferase [EC:2.5.1.18]
LOC_Os01g72120	No	No	Yes	No	No	No	No	No	No	No	No	No	K00799 GST, gst	glutathione S-transferase [EC:2.5.1.18]
LOC_Os01g72130	No	No	Yes	No	No	No	No	No	No	No	No	No	K00799 GST, gst	glutathione S-transferase [EC:2.5.1.18]
LOC_Os03g04260	No	Yes	No	No	No	No	No	No	No	No	No	No	K00799 GST, gst	glutathione S-transferase [EC:2.5.1.18]
LOC_Os03g50130	No	Yes	No	No	No	No	No	No	No	No	No	No	K00799 GST, gst	glutathione S-transferase [EC:2.5.1.18]
LOC_Os10g38580	No	No	No	No	No	Yes	No	Yes	No	Yes	Yes	No	K00799 GST, gst	glutathione S-transferase [EC:2.5.1.18]
LOC_Os10g38590	No	No	Yes	No	No	No	No	No	No	No	No	No	K00799 GST, gst	glutathione S-transferase [EC:2.5.1.18]
LOC_Os10g38700	No	Yes	No	No	No	No	No	Yes	No	No	No	No	K00799 GST, gst	glutathione S-transferase [EC:2.5.1.18]
LOC_Os10g38710	No	No	No	No	No	Yes	No	Yes	No	Yes	No	No	K00799 GST, gst	glutathione S-transferase [EC:2.5.1.18]
LOC_Os03g09020	No	No	Yes	No	No	No	No	No	Yes	No	No	No	K00121 frmA, ADH5, adhC	S-(hydroxymethyl)glutathione dehydrogenase / alcohol dehydrogenase [EC:1.1.1.284 1.1.1.1]
05203 Viral carciNogenesis [PATH:ko05203]	No	No	No	No	No	No	No	No	No	No	No	No
LOC_Os02g05480	Yes	No	No	No	No	No	No	No	No	No	No	No	K04371 ERK1_2	extracellular signal-regulated kinase 1/2 [EC:2.7.11.24]
LOC_Os03g17700	No	No	No	Yes	No	No	No	No	No	No	No	No	K04371 ERK1_2	extracellular signal-regulated kinase 1/2 [EC:2.7.11.24]
LOC_Os06g48590	No	Yes	No	No	No	No	No	Yes	No	No	No	No	K04371 ERK1_2	extracellular signal-regulated kinase 1/2 [EC:2.7.11.24]
LOC_Os03g59050	Yes	No	No	No	No	No	Yes	No	No	No	No	No	K11594 DDX3X, bel	ATP-dependent RNA helicase [EC:3.6.4.13]
LOC_Os08g38300	No	Yes	No	No	No	No	No	Yes	No	No	No	No	K11252 H2B	histone H2B
LOC_Os05g39050	No	Yes	No	No	No	No	No	No	No	No	No	No	K11254 H4	histone H4
LOC_Os07g36500	No	Yes	No	No	No	No	No	No	No	No	No	No	K11254 H4	histone H4
LOC_Os03g07930	Yes	No	No	No	No	No	Yes	No	No	No	No	No	K03137 TFIIE2, GTF2E2, TFA2	transcription initiation factor TFIIE subunit beta
LOC_Os04g32960	No	No	Yes	No	No	No	No	No	No	No	No	No	K15979 SND1	staphylococcal nuclease domain-containing protein 1
LOC_Os03g10070	No	Yes	No	No	No	No	No	No	No	No	No	No	K03124 TFIIB, GTF2B, SUA7, tfb	transcription initiation factor TFIIB
LOC_Os01g65920	No	No	Yes	No	No	No	No	No	Yes	No	No	No	K03875 SKP2, FBXL1	F-box and leucine-rich repeat protein 1 (S-phase kinase-associated protein 2)
LOC_Os02g12380	No	No	Yes	No	No	No	No	No	No	No	No	No	K06067 HDAC1_2	histone deacetylase 1/2 [EC:3.5.1.98]
LOC_Os10g28040	No	Yes	No	No	No	No	No	Yes	No	No	No	No	K06062 PCAF, KAT2, GCN5	histone acetyltransferase [EC:2.3.1.48]
LOC_Os01g73890	Yes	No	No	No	No	No	Yes	No	No	No	No	No	K03123 TFIIA2, GTF2A2, TOA2	transcription initiation factor TFIIA small subunit
LOC_Os02g50860	No	Yes	No	No	No	No	No	No	No	No	No	No	K04392 RAC1	Ras-related C3 botulinum toxin substrate 1
05210 Colorectal cancer [PATH:ko05210]	No	No	No	No	No	No	No	No	No	No	No	No
LOC_Os02g05480	Yes	No	No	No	No	No	No	No	No	No	No	No	K04371 ERK1_2	extracellular signal-regulated kinase 1/2 [EC:2.7.11.24]
LOC_Os03g17700	No	No	No	Yes	No	No	No	No	No	No	No	No	K04371 ERK1_2	extracellular signal-regulated kinase 1/2 [EC:2.7.11.24]
LOC_Os06g48590	No	Yes	No	No	No	No	No	Yes	No	No	No	No	K04371 ERK1_2	extracellular signal-regulated kinase 1/2 [EC:2.7.11.24]
LOC_Os02g50860	No	Yes	No	No	No	No	No	No	No	No	No	No	K04392 RAC1	Ras-related C3 botulinum toxin substrate 1
05212 Pancreatic cancer [PATH:ko05212]	No	No	No	No	No	No	No	No	No	No	No	No
LOC_Os02g50860	No	Yes	No	No	No	No	No	No	No	No	No	No	K04392 RAC1	Ras-related C3 botulinum toxin substrate 1
LOC_Os02g05480	Yes	No	No	No	No	No	No	No	No	No	No	No	K04371 ERK1_2	extracellular signal-regulated kinase 1/2 [EC:2.7.11.24]
LOC_Os03g17700	No	No	No	Yes	No	No	No	No	No	No	No	No	K04371 ERK1_2	extracellular signal-regulated kinase 1/2 [EC:2.7.11.24]
LOC_Os06g48590	No	Yes	No	No	No	No	No	Yes	No	No	No	No	K04371 ERK1_2	extracellular signal-regulated kinase 1/2 [EC:2.7.11.24]
LOC_Os02g33430	Yes	No	No	No	No	No	No	No	No	No	No	No	K06620 E2F1_3	E2F transcription factor 1/3
LOC_Os12g31370	Yes	No	No	No	No	No	No	No	No	No	No	No	K04482 RAD51	DNA repair protein RAD51
05214 Glioma [PATH:ko05214]	No	No	No	No	No	No	No	No	No	No	No	No
LOC_Os02g05480	Yes	No	No	No	No	No	No	No	No	No	No	No	K04371 ERK1_2	extracellular signal-regulated kinase 1/2 [EC:2.7.11.24]
LOC_Os03g17700	No	No	No	Yes	No	No	No	No	No	No	No	No	K04371 ERK1_2	extracellular signal-regulated kinase 1/2 [EC:2.7.11.24]
LOC_Os06g48590	No	Yes	No	No	No	No	No	Yes	No	No	No	No	K04371 ERK1_2	extracellular signal-regulated kinase 1/2 [EC:2.7.11.24]
LOC_Os02g33430	Yes	No	No	No	No	No	No	No	No	No	No	No	K06620 E2F1_3	E2F transcription factor 1/3
05216 Thyroid cancer [PATH:ko05216]	No	No	No	No	No	No	No	No	No	No	No	No
LOC_Os02g05480	Yes	No	No	No	No	No	No	No	No	No	No	No	K04371 ERK1_2	extracellular signal-regulated kinase 1/2 [EC:2.7.11.24]
LOC_Os03g17700	No	No	No	Yes	No	No	No	No	No	No	No	No	K04371 ERK1_2	extracellular signal-regulated kinase 1/2 [EC:2.7.11.24]
LOC_Os06g48590	No	Yes	No	No	No	No	No	Yes	No	No	No	No	K04371 ERK1_2	extracellular signal-regulated kinase 1/2 [EC:2.7.11.24]
05221 Acute myeloid leukemia [PATH:ko05221]	No	No	No	No	No	No	No	No	No	No	No	No
LOC_Os03g21620	No	No	Yes	No	No	No	No	No	No	No	No	No	K04688 RPS6KB	p70 ribosomal S6 kinase [EC:2.7.11.1]
LOC_Os02g05480	Yes	No	No	No	No	No	No	No	No	No	No	No	K04371 ERK1_2	extracellular signal-regulated kinase 1/2 [EC:2.7.11.24]
LOC_Os03g17700	No	No	No	Yes	No	No	No	No	No	No	No	No	K04371 ERK1_2	extracellular signal-regulated kinase 1/2 [EC:2.7.11.24]
LOC_Os06g48590	No	Yes	No	No	No	No	No	Yes	No	No	No	No	K04371 ERK1_2	extracellular signal-regulated kinase 1/2 [EC:2.7.11.24]
05220 Chronic myeloid leukemia [PATH:ko05220]	No	No	No	No	No	No	No	No	No	No	No	No
LOC_Os02g05480	Yes	No	No	No	No	No	No	No	No	No	No	No	K04371 ERK1_2	extracellular signal-regulated kinase 1/2 [EC:2.7.11.24]
LOC_Os03g17700	No	No	No	Yes	No	No	No	No	No	No	No	No	K04371 ERK1_2	extracellular signal-regulated kinase 1/2 [EC:2.7.11.24]
LOC_Os06g48590	No	Yes	No	No	No	No	No	Yes	No	No	No	No	K04371 ERK1_2	extracellular signal-regulated kinase 1/2 [EC:2.7.11.24]
LOC_Os02g33430	Yes	No	No	No	No	No	No	No	No	No	No	No	K06620 E2F1_3	E2F transcription factor 1/3
LOC_Os02g12380	No	No	Yes	No	No	No	No	No	No	No	No	No	K06067 HDAC1_2	histone deacetylase 1/2 [EC:3.5.1.98]
05217 Basal cell carciNoma [PATH:ko05217]	No	No	No	No	No	No	No	No	No	No	No	No
05218 MelaNoma [PATH:ko05218]	No	No	No	No	No	No	No	No	No	No	No	No
LOC_Os02g05480	Yes	No	No	No	No	No	No	No	No	No	No	No	K04371 ERK1_2	extracellular signal-regulated kinase 1/2 [EC:2.7.11.24]
LOC_Os03g17700	No	No	No	Yes	No	No	No	No	No	No	No	No	K04371 ERK1_2	extracellular signal-regulated kinase 1/2 [EC:2.7.11.24]
LOC_Os06g48590	No	Yes	No	No	No	No	No	Yes	No	No	No	No	K04371 ERK1_2	extracellular signal-regulated kinase 1/2 [EC:2.7.11.24]
LOC_Os02g33430	Yes	No	No	No	No	No	No	No	No	No	No	No	K06620 E2F1_3	E2F transcription factor 1/3
05211 Renal cell carciNoma [PATH:ko05211]	No	No	No	No	No	No	No	No	No	No	No	No
LOC_Os11g48030	No	Yes	No	No	No	No	No	Yes	No	No	No	No	K03872 TCEB1	transcription elongation factor B, polypeptide 1
LOC_Os02g05480	Yes	No	No	No	No	No	No	No	No	No	No	No	K04371 ERK1_2	extracellular signal-regulated kinase 1/2 [EC:2.7.11.24]
LOC_Os03g17700	No	No	No	Yes	No	No	No	No	No	No	No	No	K04371 ERK1_2	extracellular signal-regulated kinase 1/2 [EC:2.7.11.24]
LOC_Os06g48590	No	Yes	No	No	No	No	No	Yes	No	No	No	No	K04371 ERK1_2	extracellular signal-regulated kinase 1/2 [EC:2.7.11.24]
LOC_Os02g50860	No	Yes	No	No	No	No	No	No	No	No	No	No	K04392 RAC1	Ras-related C3 botulinum toxin substrate 1
05219 Bladder cancer [PATH:ko05219]	No	No	No	No	No	No	No	No	No	No	No	No
LOC_Os02g05480	Yes	No	No	No	No	No	No	No	No	No	No	No	K04371 ERK1_2	extracellular signal-regulated kinase 1/2 [EC:2.7.11.24]
LOC_Os03g17700	No	No	No	Yes	No	No	No	No	No	No	No	No	K04371 ERK1_2	extracellular signal-regulated kinase 1/2 [EC:2.7.11.24]
LOC_Os06g48590	No	Yes	No	No	No	No	No	Yes	No	No	No	No	K04371 ERK1_2	extracellular signal-regulated kinase 1/2 [EC:2.7.11.24]
LOC_Os02g33430	Yes	No	No	No	No	No	No	No	No	No	No	No	K06620 E2F1_3	E2F transcription factor 1/3
05215 Prostate cancer [PATH:ko05215]	No	No	No	No	No	No	No	No	No	No	No	No
LOC_Os02g33430	Yes	No	No	No	No	No	No	No	No	No	No	No	K06620 E2F1_3	E2F transcription factor 1/3
LOC_Os02g05480	Yes	No	No	No	No	No	No	No	No	No	No	No	K04371 ERK1_2	extracellular signal-regulated kinase 1/2 [EC:2.7.11.24]
LOC_Os03g17700	No	No	No	Yes	No	No	No	No	No	No	No	No	K04371 ERK1_2	extracellular signal-regulated kinase 1/2 [EC:2.7.11.24]
LOC_Os06g48590	No	Yes	No	No	No	No	No	Yes	No	No	No	No	K04371 ERK1_2	extracellular signal-regulated kinase 1/2 [EC:2.7.11.24]
LOC_Os04g01740	No	No	Yes	No	No	No	No	No	Yes	No	No	No	K04079 htpG, HSP90A	molecular chaperone HtpG
LOC_Os08g39140	No	Yes	No	No	No	No	No	Yes	No	No	No	No	K04079 htpG, HSP90A	molecular chaperone HtpG
LOC_Os06g50300	No	Yes	No	No	No	No	No	Yes	No	No	No	No	K09487 HSP90B, TRA1	heat shock protein 90kDa beta
05213 Endometrial cancer [PATH:ko05213]	No	No	No	No	No	No	No	No	No	No	No	No
LOC_Os02g05480	Yes	No	No	No	No	No	No	No	No	No	No	No	K04371 ERK1_2	extracellular signal-regulated kinase 1/2 [EC:2.7.11.24]
LOC_Os03g17700	No	No	No	Yes	No	No	No	No	No	No	No	No	K04371 ERK1_2	extracellular signal-regulated kinase 1/2 [EC:2.7.11.24]
LOC_Os06g48590	No	Yes	No	No	No	No	No	Yes	No	No	No	No	K04371 ERK1_2	extracellular signal-regulated kinase 1/2 [EC:2.7.11.24]
05222 Small cell lung cancer [PATH:ko05222]	No	No	No	No	No	No	No	No	No	No	No	No
LOC_Os01g65920	No	No	Yes	No	No	No	No	No	Yes	No	No	No	K03875 SKP2, FBXL1	F-box and leucine-rich repeat protein 1 (S-phase kinase-associated protein 2)
LOC_Os02g33430	Yes	No	No	No	No	No	No	No	No	No	No	No	K06620 E2F1_3	E2F transcription factor 1/3
05223 Non-small cell lung cancer [PATH:ko05223]	No	No	No	No	No	No	No	No	No	No	No	No
LOC_Os02g33430	Yes	No	No	No	No	No	No	No	No	No	No	No	K06620 E2F1_3	E2F transcription factor 1/3
LOC_Os02g05480	Yes	No	No	No	No	No	No	No	No	No	No	No	K04371 ERK1_2	extracellular signal-regulated kinase 1/2 [EC:2.7.11.24]
LOC_Os03g17700	No	No	No	Yes	No	No	No	No	No	No	No	No	K04371 ERK1_2	extracellular signal-regulated kinase 1/2 [EC:2.7.11.24]
LOC_Os06g48590	No	Yes	No	No	No	No	No	Yes	No	No	No	No	K04371 ERK1_2	extracellular signal-regulated kinase 1/2 [EC:2.7.11.24]
Immune diseases	No	No	No	No	No	No	No	No	No	No	No	No
05310 Asthma [PATH:ko05310]	No	No	No	No	No	No	No	No	No	No	No	No
05322 Systemic lupus erythematosus [PATH:ko05322]	No	No	No	No	No	No	No	No	No	No	No	No
LOC_Os03g17100	No	Yes	No	No	No	No	No	Yes	No	No	No	No	K11251 H2A	histone H2A
LOC_Os05g38640	No	Yes	No	No	No	No	No	Yes	No	No	No	No	K11251 H2A	histone H2A
LOC_Os08g38300	No	Yes	No	No	No	No	No	Yes	No	No	No	No	K11252 H2B	histone H2B
LOC_Os06g06490	No	Yes	No	No	No	No	No	Yes	No	No	No	No	K11253 H3	histone H3
LOC_Os05g39050	No	Yes	No	No	No	No	No	No	No	No	No	No	K11254 H4	histone H4
LOC_Os07g36500	No	Yes	No	No	No	No	No	No	No	No	No	No	K11254 H4	histone H4
05323 Rheumatoid arthritis [PATH:ko05323]	No	No	No	No	No	No	No	No	No	No	No	No
LOC_Os01g51380	No	No	Yes	No	No	No	No	No	No	No	No	No	K02147 ATPeVB, ATP6B1	V-type H+-transporting ATPase subunit B [EC:3.6.3.14]
LOC_Os04g51270	No	No	Yes	No	No	No	No	No	No	No	No	No	K02152 ATPeVG, ATP6G1	V-type H+-transporting ATPase subunit G [EC:3.6.3.14]
05320 Autoimmune thyroid disease [PATH:ko05320]	No	No	No	No	No	No	No	No	No	No	No	No
05330 Allograft rejection [PATH:ko05330]	No	No	No	No	No	No	No	No	No	No	No	No
05332 Graft-versus-host disease [PATH:ko05332]	No	No	No	No	No	No	No	No	No	No	No	No
05340 Primary immuNodeficiency [PATH:ko05340]	No	No	No	No	No	No	No	No	No	No	No	No
LOC_Os07g46630	No	Yes	Yes	No	No	No	No	No	No	No	No	No	K01488 E3.5.4.4, ADA, add	adeNosine deaminase [EC:3.5.4.4]
Neurodegenerative diseases	No	No	No	No	No	No	No	No	No	No	No	No
05010 Alzheimer's disease [PATH:ko05010]	No	No	No	No	No	No	No	No	No	No	No	No
LOC_Os03g60550	No	Yes	No	No	No	No	No	No	No	No	No	No	K04532 APPBP1	amyloid beta precursor protein binding protein 1
LOC_Os06g45590	No	No	No	Yes	No	No	No	No	No	No	No	No	K00134 GAPDH, gapA	glyceraldehyde 3-phosphate dehydrogenase [EC:1.2.1.12]
LOC_Os02g57180	No	Yes	No	No	No	No	No	Yes	No	No	No	No	K03953 NDUFA9	NADH dehydrogenase (ubiquiNone) 1 alpha subcomplex 9 [EC:1.6.5.3 1.6.99.3]
LOC_Os12g33958	Yes	No	No	No	No	No	No	No	No	No	No	No	K03935 NDUFS2	NADH dehydrogenase (ubiquiNone) Fe-S protein 2 [EC:1.6.5.3 1.6.99.3]
LOC_Os12g39930	Yes	No	No	No	No	No	No	No	No	No	No	No	K02262 COX3	cytochrome c oxidase subunit 3
LOC_Os12g33946	Yes	No	No	No	No	No	No	No	No	No	No	No	K02256 COX1	cytochrome c oxidase subunit 1 [EC:1.9.3.1]
LOC_Os01g67364	Yes	No	No	No	No	No	No	No	No	No	No	No	K02261 COX2	cytochrome c oxidase subunit 2
LOC_Os02g05480	Yes	No	No	No	No	No	No	No	No	No	No	No	K04371 ERK1_2	extracellular signal-regulated kinase 1/2 [EC:2.7.11.24]
LOC_Os03g17700	No	No	No	Yes	No	No	No	No	No	No	No	No	K04371 ERK1_2	extracellular signal-regulated kinase 1/2 [EC:2.7.11.24]
LOC_Os06g48590	No	Yes	No	No	No	No	No	Yes	No	No	No	No	K04371 ERK1_2	extracellular signal-regulated kinase 1/2 [EC:2.7.11.24]
05012 Parkinson's disease [PATH:ko05012]	No	No	No	No	No	No	No	No	No	No	No	No
LOC_Os11g01510	Yes	No	No	No	No	No	Yes	No	No	No	No	No	K03178 UBE1, UBA1	ubiquitin-activating enzyme E1 [EC:6.3.2.19]
LOC_Os02g57180	No	Yes	No	No	No	No	No	Yes	No	No	No	No	K03953 NDUFA9	NADH dehydrogenase (ubiquiNone) 1 alpha subcomplex 9 [EC:1.6.5.3 1.6.99.3]
LOC_Os12g33958	Yes	No	No	No	No	No	No	No	No	No	No	No	K03935 NDUFS2	NADH dehydrogenase (ubiquiNone) Fe-S protein 2 [EC:1.6.5.3 1.6.99.3]
LOC_Os12g39930	Yes	No	No	No	No	No	No	No	No	No	No	No	K02262 COX3	cytochrome c oxidase subunit 3
LOC_Os12g33946	Yes	No	No	No	No	No	No	No	No	No	No	No	K02256 COX1	cytochrome c oxidase subunit 1 [EC:1.9.3.1]
LOC_Os01g67364	Yes	No	No	No	No	No	No	No	No	No	No	No	K02261 COX2	cytochrome c oxidase subunit 2
05014 Amyotrophic lateral sclerosis (ALS) [PATH:ko05014]	No	No	No	No	No	No	No	No	No	No	No	No
LOC_Os08g44770	No	Yes	No	No	No	No	No	Yes	No	No	No	No	K04565 SOD1	superoxide dismutase, Cu-Zn family [EC:1.15.1.1]
LOC_Os06g51150	No	No	Yes	No	No	No	No	No	No	No	No	No	K03781 katE, CAT, catB, srpA	catalase [EC:1.11.1.6]
LOC_Os02g50860	No	Yes	No	No	No	No	No	No	No	No	No	No	K04392 RAC1	Ras-related C3 botulinum toxin substrate 1
05016 Huntington's disease [PATH:ko05016]	No	No	No	No	No	No	No	No	No	No	No	No
LOC_Os02g12380	No	No	Yes	No	No	No	No	No	No	No	No	No	K06067 HDAC1_2	histone deacetylase 1/2 [EC:3.5.1.98]
LOC_Os05g05860	Yes	No	No	No	No	No	Yes	No	No	No	No	No	K03006 RPB1, POLR2A	DNA-directed RNA polymerase II subunit RPB1 [EC:2.7.7.6]
LOC_Os11g45080	Yes	No	No	No	No	No	No	No	No	No	No	No	K03017 RPB9, POLR2I	DNA-directed RNA polymerase II subunit RPB9
LOC_Os12g37370	No	Yes	No	No	No	No	No	Yes	No	No	No	No	K03017 RPB9, POLR2I	DNA-directed RNA polymerase II subunit RPB9
LOC_Os01g34614	No	Yes	No	No	No	No	No	Yes	No	No	No	No	K03009 RPB12, POLR2K	DNA-directed RNA polymerases I, II, and III subunit RPABC4
LOC_Os08g44770	No	Yes	No	No	No	No	No	Yes	No	No	No	No	K04565 SOD1	superoxide dismutase, Cu-Zn family [EC:1.15.1.1]
LOC_Os06g02500	No	Yes	No	No	No	No	No	Yes	No	No	No	No	K04564 SOD2	superoxide dismutase, Fe-Mn family [EC:1.15.1.1]
LOC_Os02g57180	No	Yes	No	No	No	No	No	Yes	No	No	No	No	K03953 NDUFA9	NADH dehydrogenase (ubiquiNone) 1 alpha subcomplex 9 [EC:1.6.5.3 1.6.99.3]
LOC_Os12g33958	Yes	No	No	No	No	No	No	No	No	No	No	No	K03935 NDUFS2	NADH dehydrogenase (ubiquiNone) Fe-S protein 2 [EC:1.6.5.3 1.6.99.3]
LOC_Os12g39930	Yes	No	No	No	No	No	No	No	No	No	No	No	K02262 COX3	cytochrome c oxidase subunit 3
LOC_Os12g33946	Yes	No	No	No	No	No	No	No	No	No	No	No	K02256 COX1	cytochrome c oxidase subunit 1 [EC:1.9.3.1]
LOC_Os01g67364	Yes	No	No	No	No	No	No	No	No	No	No	No	K02261 COX2	cytochrome c oxidase subunit 2
05020 Prion diseases [PATH:ko05020]	No	No	No	No	No	No	No	No	No	No	No	No
LOC_Os08g44770	No	Yes	No	No	No	No	No	Yes	No	No	No	No	K04565 SOD1	superoxide dismutase, Cu-Zn family [EC:1.15.1.1]
LOC_Os02g43020	No	Yes	No	No	No	No	No	Yes	No	No	No	No	K09553 STIP1	stress-induced-phosphoprotein 1
LOC_Os04g45480	No	Yes	No	No	No	No	No	Yes	No	No	No	No	K09553 STIP1	stress-induced-phosphoprotein 1
LOC_Os02g05480	Yes	No	No	No	No	No	No	No	No	No	No	No	K04371 ERK1_2	extracellular signal-regulated kinase 1/2 [EC:2.7.11.24]
LOC_Os03g17700	No	No	No	Yes	No	No	No	No	No	No	No	No	K04371 ERK1_2	extracellular signal-regulated kinase 1/2 [EC:2.7.11.24]
LOC_Os06g48590	No	Yes	No	No	No	No	No	Yes	No	No	No	No	K04371 ERK1_2	extracellular signal-regulated kinase 1/2 [EC:2.7.11.24]
Substance dependence	No	No	No	No	No	No	No	No	No	No	No	No
05030 Cocaine addiction [PATH:ko05030]	No	No	No	No	No	No	No	No	No	No	No	No
05031 Amphetamine addiction [PATH:ko05031]	No	No	No	No	No	No	No	No	No	No	No	No
05032 Morphine addiction [PATH:ko05032]	No	No	No	No	No	No	No	No	No	No	No	No
LOC_Os04g38680	No	Yes	Yes	No	No	No	No	Yes	No	No	No	No	K15015 SLC32A, VGAT	solute carrier family 32 (vesicular inhibitory amiNo acid transporter)
05033 Nicotine addiction [PATH:ko05033]	No	No	No	No	No	No	No	No	No	No	No	No
LOC_Os04g38680	No	Yes	Yes	No	No	No	No	Yes	No	No	No	No	K15015 SLC32A, VGAT	solute carrier family 32 (vesicular inhibitory amiNo acid transporter)
05034 Alcoholism [PATH:ko05034]	No	No	No	No	No	No	No	No	No	No	No	No
LOC_Os02g12380	No	No	Yes	No	No	No	No	No	No	No	No	No	K06067 HDAC1_2	histone deacetylase 1/2 [EC:3.5.1.98]
LOC_Os03g17100	No	Yes	No	No	No	No	No	Yes	No	No	No	No	K11251 H2A	histone H2A
LOC_Os05g38640	No	Yes	No	No	No	No	No	Yes	No	No	No	No	K11251 H2A	histone H2A
LOC_Os08g38300	No	Yes	No	No	No	No	No	Yes	No	No	No	No	K11252 H2B	histone H2B
LOC_Os06g06490	No	Yes	No	No	No	No	No	Yes	No	No	No	No	K11253 H3	histone H3
LOC_Os05g39050	No	Yes	No	No	No	No	No	No	No	No	No	No	K11254 H4	histone H4
LOC_Os07g36500	No	Yes	No	No	No	No	No	No	No	No	No	No	K11254 H4	histone H4
LOC_Os02g05480	Yes	No	No	No	No	No	No	No	No	No	No	No	K04371 ERK1_2	extracellular signal-regulated kinase 1/2 [EC:2.7.11.24]
LOC_Os03g17700	No	No	No	Yes	No	No	No	No	No	No	No	No	K04371 ERK1_2	extracellular signal-regulated kinase 1/2 [EC:2.7.11.24]
LOC_Os06g48590	No	Yes	No	No	No	No	No	Yes	No	No	No	No	K04371 ERK1_2	extracellular signal-regulated kinase 1/2 [EC:2.7.11.24]
Cardiovascular diseases	No	No	No	No	No	No	No	No	No	No	No	No
05410 Hypertrophic cardiomyopathy (HCM) [PATH:ko05410]	No	No	No	No	No	No	No	No	No	No	No	No
05412 Arrhythmogenic right ventricular cardiomyopathy (ARVC) [PATH:ko05412]	No	No	No	No	No	No	No	No	No	No	No	No
05414 Dilated cardiomyopathy (DCM) [PATH:ko05414]	No	No	No	No	No	No	No	No	No	No	No	No
05416 Viral myocarditis [PATH:ko05416]	No	No	No	No	No	No	No	No	No	No	No	No
LOC_Os02g50860	No	Yes	No	No	No	No	No	No	No	No	No	No	K04392 RAC1	Ras-related C3 botulinum toxin substrate 1
Endocrine and metabolic diseases	No	No	No	No	No	No	No	No	No	No	No	No
04940 Type I diabetes mellitus [PATH:ko04940]	No	No	No	No	No	No	No	No	No	No	No	No
LOC_Os03g51080	No	No	Yes	No	No	No	No	No	No	No	No	No	K01580 E4.1.1.15, gadB, gadA, GAD	glutamate decarboxylase [EC:4.1.1.15]
LOC_Os04g37500	No	No	Yes	No	No	No	No	No	No	No	No	No	K01580 E4.1.1.15, gadB, gadA, GAD	glutamate decarboxylase [EC:4.1.1.15]
LOC_Os08g36320	No	Yes	No	No	No	No	No	Yes	No	No	No	No	K01580 E4.1.1.15, gadB, gadA, GAD	glutamate decarboxylase [EC:4.1.1.15]
04930 Type II diabetes mellitus [PATH:ko04930]	No	No	No	No	No	No	No	No	No	No	No	No
LOC_Os02g05480	Yes	No	No	No	No	No	No	No	No	No	No	No	K04371 ERK1_2	extracellular signal-regulated kinase 1/2 [EC:2.7.11.24]
LOC_Os03g17700	No	No	No	Yes	No	No	No	No	No	No	No	No	K04371 ERK1_2	extracellular signal-regulated kinase 1/2 [EC:2.7.11.24]
LOC_Os06g48590	No	Yes	No	No	No	No	No	Yes	No	No	No	No	K04371 ERK1_2	extracellular signal-regulated kinase 1/2 [EC:2.7.11.24]
LOC_Os05g09500	No	No	Yes	No	No	No	No	No	No	No	No	No	K00844 HK	hexokinase [EC:2.7.1.1]
04950 Maturity onset diabetes of the young [PATH:ko04950]	No	No	No	No	No	No	No	No	No	No	No	No
Infectious diseases	No	No	No	No	No	No	No	No	No	No	No	No
05110 Vibrio cholerae infection [PATH:ko05110]	No	No	No	No	No	No	No	No	No	No	No	No
LOC_Os01g51380	No	No	Yes	No	No	No	No	No	No	No	No	No	K02147 ATPeVB, ATP6B1	V-type H+-transporting ATPase subunit B [EC:3.6.3.14]
LOC_Os04g51270	No	No	Yes	No	No	No	No	No	No	No	No	No	K02152 ATPeVG, ATP6G1	V-type H+-transporting ATPase subunit G [EC:3.6.3.14]
LOC_Os11g28340	No	Yes	No	No	No	No	No	Yes	No	No	No	No	K10949 KDELR	ER lumen protein retaining receptor
05111 Vibrio cholerae pathogenic cycle [PATH:ko05111]	No	No	No	No	No	No	No	No	No	No	No	No
05120 Epithelial cell signaling in Helicobacter pylori infection [PATH:ko05120]	No	No	No	No	No	No	No	No	No	No	No	No
LOC_Os02g50860	No	Yes	No	No	No	No	No	No	No	No	No	No	K04392 RAC1	Ras-related C3 botulinum toxin substrate 1
LOC_Os01g51380	No	No	Yes	No	No	No	No	No	No	No	No	No	K02147 ATPeVB, ATP6B1	V-type H+-transporting ATPase subunit B [EC:3.6.3.14]
LOC_Os04g51270	No	No	Yes	No	No	No	No	No	No	No	No	No	K02152 ATPeVG, ATP6G1	V-type H+-transporting ATPase subunit G [EC:3.6.3.14]
05130 Pathogenic Escherichia coli infection [PATH:ko05130]	No	No	No	No	No	No	No	No	No	No	No	No
LOC_Os01g18050	No	No	No	Yes	No	No	No	No	No	Yes	No	No	K07375 TUBB	tubulin beta
LOC_Os01g59150	No	Yes	No	No	No	No	No	Yes	No	No	No	No	K07375 TUBB	tubulin beta
LOC_Os06g45990	Yes	No	No	No	No	No	Yes	No	No	No	No	No	K07375 TUBB	tubulin beta
05132 Salmonella infection [PATH:ko05132]	No	No	No	No	No	No	No	No	No	No	No	No
LOC_Os06g20430	No	No	Yes	No	No	No	No	No	No	No	No	No	K05399 LBP	lipopolysaccharide-binding protein
LOC_Os02g50860	No	Yes	No	No	No	No	No	No	No	No	No	No	K04392 RAC1	Ras-related C3 botulinum toxin substrate 1
LOC_Os02g05480	Yes	No	No	No	No	No	No	No	No	No	No	No	K04371 ERK1_2	extracellular signal-regulated kinase 1/2 [EC:2.7.11.24]
LOC_Os03g17700	No	No	No	Yes	No	No	No	No	No	No	No	No	K04371 ERK1_2	extracellular signal-regulated kinase 1/2 [EC:2.7.11.24]
LOC_Os06g48590	No	Yes	No	No	No	No	No	Yes	No	No	No	No	K04371 ERK1_2	extracellular signal-regulated kinase 1/2 [EC:2.7.11.24]
05131 Shigellosis [PATH:ko05131]	No	No	No	No	No	No	No	No	No	No	No	No
LOC_Os02g50860	No	Yes	No	No	No	No	No	No	No	No	No	No	K04392 RAC1	Ras-related C3 botulinum toxin substrate 1
LOC_Os02g05480	Yes	No	No	No	No	No	No	No	No	No	No	No	K04371 ERK1_2	extracellular signal-regulated kinase 1/2 [EC:2.7.11.24]
LOC_Os03g17700	No	No	No	Yes	No	No	No	No	No	No	No	No	K04371 ERK1_2	extracellular signal-regulated kinase 1/2 [EC:2.7.11.24]
LOC_Os06g48590	No	Yes	No	No	No	No	No	Yes	No	No	No	No	K04371 ERK1_2	extracellular signal-regulated kinase 1/2 [EC:2.7.11.24]
05133 Pertussis [PATH:ko05133]	No	No	No	No	No	No	No	No	No	No	No	No
LOC_Os03g13950	No	No	Yes	No	No	No	No	No	No	No	No	No	K05765 CFL	cofilin
LOC_Os03g60580	No	No	Yes	No	No	No	No	No	Yes	No	No	No	K05765 CFL	cofilin
LOC_Os02g05480	Yes	No	No	No	No	No	No	No	No	No	No	No	K04371 ERK1_2	extracellular signal-regulated kinase 1/2 [EC:2.7.11.24]
LOC_Os03g17700	No	No	No	Yes	No	No	No	No	No	No	No	No	K04371 ERK1_2	extracellular signal-regulated kinase 1/2 [EC:2.7.11.24]
LOC_Os06g48590	No	Yes	No	No	No	No	No	Yes	No	No	No	No	K04371 ERK1_2	extracellular signal-regulated kinase 1/2 [EC:2.7.11.24]
05134 Legionellosis [PATH:ko05134]	No	No	No	No	No	No	No	No	No	No	No	No
LOC_Os01g62290	No	Yes	No	No	No	No	No	Yes	No	No	No	No	K03283 HSPA1_8	heat shock 70kDa protein 1/8
LOC_Os03g16860	No	Yes	No	No	No	No	No	No	No	No	No	No	K03283 HSPA1_8	heat shock 70kDa protein 1/8
LOC_Os03g16880	Yes	No	No	No	No	No	Yes	No	No	No	No	No	K03283 HSPA1_8	heat shock 70kDa protein 1/8
LOC_Os03g16920	No	No	Yes	No	No	No	No	No	No	No	No	No	K03283 HSPA1_8	heat shock 70kDa protein 1/8
LOC_Os05g38530	No	Yes	No	No	No	No	No	Yes	No	No	No	No	K03283 HSPA1_8	heat shock 70kDa protein 1/8
LOC_Os02g12794	No	Yes	No	No	No	No	No	No	No	No	No	No	K03233 EEF1G	elongation factor 1-gamma
05150 Staphylococcus aureus infection [PATH:ko05150]	No	No	No	No	No	No	No	No	No	No	No	No
05152 Tuberculosis [PATH:ko05152]	No	No	No	No	No	No	No	No	No	No	No	No
LOC_Os03g07880	No	Yes	No	No	No	No	No	Yes	No	No	No	No	K08064 NFYA	nuclear transcription factor Y, alpha
LOC_Os08g09690	No	Yes	No	No	No	No	No	Yes	No	No	No	No	K08064 NFYA	nuclear transcription factor Y, alpha
LOC_Os03g02260	No	Yes	No	No	No	No	No	Yes	No	No	No	No	K04043 dnaK	molecular chaperone DnaK
LOC_Os06g20430	No	No	Yes	No	No	No	No	No	No	No	No	No	K05399 LBP	lipopolysaccharide-binding protein
LOC_Os02g05480	Yes	No	No	No	No	No	No	No	No	No	No	No	K04371 ERK1_2	extracellular signal-regulated kinase 1/2 [EC:2.7.11.24]
LOC_Os03g17700	No	No	No	Yes	No	No	No	No	No	No	No	No	K04371 ERK1_2	extracellular signal-regulated kinase 1/2 [EC:2.7.11.24]
LOC_Os06g48590	No	Yes	No	No	No	No	No	Yes	No	No	No	No	K04371 ERK1_2	extracellular signal-regulated kinase 1/2 [EC:2.7.11.24]
05100 Bacterial invasion of epithelial cells [PATH:ko05100]	No	No	No	No	No	No	No	No	No	No	No	No
LOC_Os02g50860	No	Yes	No	No	No	No	No	No	No	No	No	No	K04392 RAC1	Ras-related C3 botulinum toxin substrate 1
05166 HTLV-I infection [PATH:ko05166]	No	No	No	No	No	No	No	No	No	No	No	No
LOC_Os05g49890	Yes	No	No	No	No	No	Yes	No	No	No	No	No	K07936 RAN	GTP-binding nuclear protein Ran
LOC_Os03g61670	No	No	Yes	No	No	No	No	No	No	No	No	No	K08057 CALR	calreticulin
LOC_Os04g56230	No	No	No	Yes	No	No	No	No	No	Yes	No	No	K00787 FDPS	farnesyl diphosphate synthase [EC:2.5.1.1 2.5.1.10]
LOC_Os02g56130	No	Yes	No	No	No	No	No	Yes	No	No	No	No	K04802 PCNA	proliferating cell nuclear antigen
LOC_Os02g33430	Yes	No	No	No	No	No	No	No	No	No	No	No	K06620 E2F1_3	E2F transcription factor 1/3
LOC_Os10g28040	No	Yes	No	No	No	No	No	Yes	No	No	No	No	K06062 PCAF, KAT2, GCN5	histone acetyltransferase [EC:2.3.1.48]
05162 Measles [PATH:ko05162]	No	No	No	No	No	No	No	No	No	No	No	No
LOC_Os01g49290	No	Yes	No	No	No	No	No	Yes	No	No	No	No	K14753 RACK1	guanine nucleotide-binding protein subunit beta-2-like 1 protein
LOC_Os01g62290	No	Yes	No	No	No	No	No	Yes	No	No	No	No	K03283 HSPA1_8	heat shock 70kDa protein 1/8
LOC_Os03g16860	No	Yes	No	No	No	No	No	No	No	No	No	No	K03283 HSPA1_8	heat shock 70kDa protein 1/8
LOC_Os03g16880	Yes	No	No	No	No	No	Yes	No	No	No	No	No	K03283 HSPA1_8	heat shock 70kDa protein 1/8
LOC_Os03g16920	No	No	Yes	No	No	No	No	No	No	No	No	No	K03283 HSPA1_8	heat shock 70kDa protein 1/8
LOC_Os05g38530	No	Yes	No	No	No	No	No	Yes	No	No	No	No	K03283 HSPA1_8	heat shock 70kDa protein 1/8
LOC_Os01g52110	No	No	Yes	No	No	No	No	No	Yes	No	No	No	K10144 RCHY1, PIRH2	RING finger and CHY zinc finger domain-containing protein 1 [EC:6.3.2.19]
LOC_Os03g05270	No	No	Yes	No	No	No	No	No	No	No	No	No	K10144 RCHY1, PIRH2	RING finger and CHY zinc finger domain-containing protein 1 [EC:6.3.2.19]
LOC_Os03g22680	No	No	Yes	No	No	No	No	No	Yes	No	No	No	K10144 RCHY1, PIRH2	RING finger and CHY zinc finger domain-containing protein 1 [EC:6.3.2.19]
LOC_Os10g31850	Yes	No	No	No	No	No	Yes	No	No	No	No	No	K10144 RCHY1, PIRH2	RING finger and CHY zinc finger domain-containing protein 1 [EC:6.3.2.19]
05164 Influenza A [PATH:ko05164]	No	No	No	No	No	No	No	No	No	No	No	No
LOC_Os01g62290	No	Yes	No	No	No	No	No	Yes	No	No	No	No	K03283 HSPA1_8	heat shock 70kDa protein 1/8
LOC_Os03g16860	No	Yes	No	No	No	No	No	No	No	No	No	No	K03283 HSPA1_8	heat shock 70kDa protein 1/8
LOC_Os03g16880	Yes	No	No	No	No	No	Yes	No	No	No	No	No	K03283 HSPA1_8	heat shock 70kDa protein 1/8
LOC_Os03g16920	No	No	Yes	No	No	No	No	No	No	No	No	No	K03283 HSPA1_8	heat shock 70kDa protein 1/8
LOC_Os05g38530	No	Yes	No	No	No	No	No	Yes	No	No	No	No	K03283 HSPA1_8	heat shock 70kDa protein 1/8
LOC_Os02g05480	Yes	No	No	No	No	No	No	No	No	No	No	No	K04371 ERK1_2	extracellular signal-regulated kinase 1/2 [EC:2.7.11.24]
LOC_Os03g17700	No	No	No	Yes	No	No	No	No	No	No	No	No	K04371 ERK1_2	extracellular signal-regulated kinase 1/2 [EC:2.7.11.24]
LOC_Os06g48590	No	Yes	No	No	No	No	No	Yes	No	No	No	No	K04371 ERK1_2	extracellular signal-regulated kinase 1/2 [EC:2.7.11.24]
LOC_Os04g56230	No	No	No	Yes	No	No	No	No	No	Yes	No	No	K00787 FDPS	farnesyl diphosphate synthase [EC:2.5.1.1 2.5.1.10]
LOC_Os12g06870	Yes	No	No	No	No	No	Yes	No	No	No	No	No	K14297 NUP98, ADAR2	nuclear pore complex protein Nup98-Nup96
05161 Hepatitis B [PATH:ko05161]	No	No	No	No	No	No	No	No	No	No	No	No
LOC_Os02g56130	No	Yes	No	No	No	No	No	Yes	No	No	No	No	K04802 PCNA	proliferating cell nuclear antigen
LOC_Os02g05480	Yes	No	No	No	No	No	No	No	No	No	No	No	K04371 ERK1_2	extracellular signal-regulated kinase 1/2 [EC:2.7.11.24]
LOC_Os03g17700	No	No	No	Yes	No	No	No	No	No	No	No	No	K04371 ERK1_2	extracellular signal-regulated kinase 1/2 [EC:2.7.11.24]
LOC_Os06g48590	No	Yes	No	No	No	No	No	Yes	No	No	No	No	K04371 ERK1_2	extracellular signal-regulated kinase 1/2 [EC:2.7.11.24]
LOC_Os03g59050	Yes	No	No	No	No	No	Yes	No	No	No	No	No	K11594 DDX3X, bel	ATP-dependent RNA helicase [EC:3.6.4.13]
LOC_Os02g33430	Yes	No	No	No	No	No	No	No	No	No	No	No	K06620 E2F1_3	E2F transcription factor 1/3
05160 Hepatitis C [PATH:ko05160]	No	No	No	No	No	No	No	No	No	No	No	No
LOC_Os02g05480	Yes	No	No	No	No	No	No	No	No	No	No	No	K04371 ERK1_2	extracellular signal-regulated kinase 1/2 [EC:2.7.11.24]
LOC_Os03g17700	No	No	No	Yes	No	No	No	No	No	No	No	No	K04371 ERK1_2	extracellular signal-regulated kinase 1/2 [EC:2.7.11.24]
LOC_Os06g48590	No	Yes	No	No	No	No	No	Yes	No	No	No	No	K04371 ERK1_2	extracellular signal-regulated kinase 1/2 [EC:2.7.11.24]
05168 Herpes simplex infection [PATH:ko05168]	No	No	No	No	No	No	No	No	No	No	No	No
LOC_Os07g43240	No	No	Yes	No	No	No	No	No	No	No	No	No	K03094 SKP1, CBF3D	S-phase kinase-associated protein 1
LOC_Os01g65920	No	No	Yes	No	No	No	No	No	Yes	No	No	No	K03875 SKP2, FBXL1	F-box and leucine-rich repeat protein 1 (S-phase kinase-associated protein 2)
LOC_Os05g05860	Yes	No	No	No	No	No	Yes	No	No	No	No	No	K03006 RPB1, POLR2A	DNA-directed RNA polymerase II subunit RPB1 [EC:2.7.7.6]
LOC_Os02g03040	Yes	No	No	No	No	No	Yes	No	No	No	No	No	K12893 SFRS4_5_6	splicing factor, arginine/serine-rich 4/5/6
LOC_Os06g08840	No	No	Yes	No	No	No	No	No	No	No	No	No	K12896 SFRS7	splicing factor, arginine/serine-rich 7
LOC_Os03g17010	Yes	No	No	No	No	No	Yes	No	No	No	No	No	K12881 THOC4, ALY	THO complex subunit 4
05169 Epstein-Barr virus infection [PATH:ko05169]	No	No	No	No	No	No	No	No	No	No	No	No
LOC_Os05g05860	Yes	No	No	No	No	No	Yes	No	No	No	No	No	K03006 RPB1, POLR2A	DNA-directed RNA polymerase II subunit RPB1 [EC:2.7.7.6]
LOC_Os11g45080	Yes	No	No	No	No	No	No	No	No	No	No	No	K03017 RPB9, POLR2I	DNA-directed RNA polymerase II subunit RPB9
LOC_Os12g37370	No	Yes	No	No	No	No	No	Yes	No	No	No	No	K03017 RPB9, POLR2I	DNA-directed RNA polymerase II subunit RPB9
LOC_Os01g34614	No	Yes	No	No	No	No	No	Yes	No	No	No	No	K03009 RPB12, POLR2K	DNA-directed RNA polymerases I, II, and III subunit RPABC4
LOC_Os05g49890	Yes	No	No	No	No	No	Yes	No	No	No	No	No	K07936 RAN	GTP-binding nuclear protein Ran
LOC_Os01g62290	No	Yes	No	No	No	No	No	Yes	No	No	No	No	K03283 HSPA1_8	heat shock 70kDa protein 1/8
LOC_Os03g16860	No	Yes	No	No	No	No	No	No	No	No	No	No	K03283 HSPA1_8	heat shock 70kDa protein 1/8
LOC_Os03g16880	Yes	No	No	No	No	No	Yes	No	No	No	No	No	K03283 HSPA1_8	heat shock 70kDa protein 1/8
LOC_Os03g16920	No	No	Yes	No	No	No	No	No	No	No	No	No	K03283 HSPA1_8	heat shock 70kDa protein 1/8
LOC_Os05g38530	No	Yes	No	No	No	No	No	Yes	No	No	No	No	K03283 HSPA1_8	heat shock 70kDa protein 1/8
LOC_Os03g10070	No	Yes	No	No	No	No	No	No	No	No	No	No	K03124 TFIIB, GTF2B, SUA7, tfb	transcription initiation factor TFIIB
LOC_Os04g32960	No	No	Yes	No	No	No	No	No	No	No	No	No	K15979 SND1	staphylococcal nuclease domain-containing protein 1
LOC_Os03g07930	Yes	No	No	No	No	No	Yes	No	No	No	No	No	K03137 TFIIE2, GTF2E2, TFA2	transcription initiation factor TFIIE subunit beta
LOC_Os02g12380	No	No	Yes	No	No	No	No	No	No	No	No	No	K06067 HDAC1_2	histone deacetylase 1/2 [EC:3.5.1.98]
LOC_Os06g07630	No	Yes	No	No	No	No	No	Yes	No	No	No	No	K03065 PSMC3, RPT5	26S proteasome regulatory subunit T5
LOC_Os03g37950	No	Yes	No	No	No	No	No	No	No	No	No	No	K03036 PSMD11, RPN6	26S proteasome regulatory subunit N6
LOC_Os01g32800	No	Yes	No	No	No	No	No	Yes	No	No	No	No	K03039 PSMD13, RPN9	26S proteasome regulatory subunit N9
LOC_Os01g65920	No	No	Yes	No	No	No	No	No	Yes	No	No	No	K03875 SKP2, FBXL1	F-box and leucine-rich repeat protein 1 (S-phase kinase-associated protein 2)
05146 Amoebiasis [PATH:ko05146]	No	No	No	No	No	No	No	No	No	No	No	No
LOC_Os04g01590	No	No	Yes	No	No	No	No	No	No	No	No	No	K01476 E3.5.3.1, rocF, arg	arginase [EC:3.5.3.1]
LOC_Os11g11500	No	Yes	No	No	No	No	No	No	No	No	No	No	K13963 SERPINB	serpin B
05144 Malaria [PATH:ko05144]	No	No	No	No	No	No	No	No	No	No	No	No
05145 Toxoplasmosis [PATH:ko05145]	No	No	No	No	No	No	No	No	No	No	No	No
LOC_Os02g05480	Yes	No	No	No	No	No	No	No	No	No	No	No	K04371 ERK1_2	extracellular signal-regulated kinase 1/2 [EC:2.7.11.24]
LOC_Os03g17700	No	No	No	Yes	No	No	No	No	No	No	No	No	K04371 ERK1_2	extracellular signal-regulated kinase 1/2 [EC:2.7.11.24]
LOC_Os06g48590	No	Yes	No	No	No	No	No	Yes	No	No	No	No	K04371 ERK1_2	extracellular signal-regulated kinase 1/2 [EC:2.7.11.24]
LOC_Os01g62290	No	Yes	No	No	No	No	No	Yes	No	No	No	No	K03283 HSPA1_8	heat shock 70kDa protein 1/8
LOC_Os03g16860	No	Yes	No	No	No	No	No	No	No	No	No	No	K03283 HSPA1_8	heat shock 70kDa protein 1/8
LOC_Os03g16880	Yes	No	No	No	No	No	Yes	No	No	No	No	No	K03283 HSPA1_8	heat shock 70kDa protein 1/8
LOC_Os03g16920	No	No	Yes	No	No	No	No	No	No	No	No	No	K03283 HSPA1_8	heat shock 70kDa protein 1/8
LOC_Os05g38530	No	Yes	No	No	No	No	No	Yes	No	No	No	No	K03283 HSPA1_8	heat shock 70kDa protein 1/8
05140 Leishmaniasis [PATH:ko05140]	No	No	No	No	No	No	No	No	No	No	No	No
LOC_Os02g05480	Yes	No	No	No	No	No	No	No	No	No	No	No	K04371 ERK1_2	extracellular signal-regulated kinase 1/2 [EC:2.7.11.24]
LOC_Os03g17700	No	No	No	Yes	No	No	No	No	No	No	No	No	K04371 ERK1_2	extracellular signal-regulated kinase 1/2 [EC:2.7.11.24]
LOC_Os06g48590	No	Yes	No	No	No	No	No	Yes	No	No	No	No	K04371 ERK1_2	extracellular signal-regulated kinase 1/2 [EC:2.7.11.24]
05142 Chagas disease (American trypaNosomiasis) [PATH:ko05142]	No	No	No	No	No	No	No	No	No	No	No	No
LOC_Os02g05480	Yes	No	No	No	No	No	No	No	No	No	No	No	K04371 ERK1_2	extracellular signal-regulated kinase 1/2 [EC:2.7.11.24]
LOC_Os03g17700	No	No	No	Yes	No	No	No	No	No	No	No	No	K04371 ERK1_2	extracellular signal-regulated kinase 1/2 [EC:2.7.11.24]
LOC_Os06g48590	No	Yes	No	No	No	No	No	Yes	No	No	No	No	K04371 ERK1_2	extracellular signal-regulated kinase 1/2 [EC:2.7.11.24]
LOC_Os03g61670	No	No	Yes	No	No	No	No	No	No	No	No	No	K08057 CALR	calreticulin
05143 African trypaNosomiasis [PATH:ko05143]	No	No	No	No	No	No	No	No	No	No	No	No
	Note:
	Yes	Significantly involved in the pathway
	No	No involved in pathway
	T4	48 hrs late response phase of CTV
	T5	After 24 hrs recovery of CTV
	S4	48 hrs late response phase of CSV
	S5	After 24 hrs recovery of CSV
	DEGs	Differentially expressed genes
	T4_up_exl_T5	Exclusively up-regulated in T4 againt T5									`
	T4_dwn-exl_T5	Exclusively down-regulated in T4 against T5
	T5_up-exl_T4	Exclusively up-regulated in T5 against T4
	T5_dwn_exl_T4	Exclusively down-regulated in T5 againt T4
	T4_T5_up	Up-regulated commonly in T4 and T5
	T4_T5_dwn	Down-regulated commonly in T4 and T5
	S4_T4_up	Up-regulated commonly in S4 and T4
	S4_T4_dwn	Down-regulated commonly in S4 and T4
	S5_T5_up	Up-regulated commonly in S5 and T5
	S5_T5_dwn	Down-regulated commonly in S5 and T5
	T1-T5_DEGs	Commonly expressed in T1, T2, T3, T4 and T5
	Excl_T1-T5_S	Exclusively expressed in T1, T2, T3, T4 and T5 against CSV
